# Supplementary material
Source: publisher figshare collection journal article supplement (https://acs.figshare.com/ndownloader/files/17515445)
Supplement: Supplementary file 1 [file 17515445]

## Supporting Information

### Synthesis and Reactivity of Zr MOFs Assembled from P<sup>N</sup>N<sup>N</sup>P-Ru Pincer Complexes

Abebu A. Kassie<sup>†</sup>, Pu Duan<sup>‡</sup>, Matthew B. Gray<sup>†</sup>, Klaus Schmidt-Rohr<sup>‡</sup>, Patrick M. Woodward<sup>†</sup>, Casey R. Wade<sup>\*†</sup>

<sup>†</sup>Department of Chemistry and Biochemistry, The Ohio State University, Columbus, Ohio 43210, United States

<sup>‡</sup>Department of Chemistry, Brandeis University, Waltham, Massachusetts 02453, United States

#### Contents

|                                                                                                                                                  |     |
|--------------------------------------------------------------------------------------------------------------------------------------------------|-----|
| Figure S1. <sup>1</sup> H NMR spectrum of [Bu <sub>4</sub> L-RuH(CO)(PPh <sub>3</sub> )]Cl in DMSO-d <sub>6</sub> .                              | S3  |
| Figure S2. <sup>31</sup> P{ <sup>1</sup> H} NMR spectrum of [Bu <sub>4</sub> L-RuH(CO)(PPh <sub>3</sub> )]Cl in DMSO-d <sub>6</sub> .            | S4  |
| Figure S3. <sup>13</sup> C{ <sup>1</sup> H} NMR spectrum of [Bu <sub>4</sub> L-RuH(CO)(PPh <sub>3</sub> )]Cl in DMSO-d <sub>6</sub> .            | S5  |
| Figure S4. <sup>1</sup> H NMR spectrum of [Bu <sub>4</sub> L-RuH(CO)(PPh <sub>3</sub> )]TFA in DMSO-d <sub>6</sub> .                             | S6  |
| Figure S5. <sup>31</sup> P{ <sup>1</sup> H} NMR spectrum of [Bu <sub>4</sub> L-RuH(CO)(PPh <sub>3</sub> )]TFA in DMSO-d <sub>6</sub> .           | S7  |
| Figure S6. <sup>1</sup> H NMR spectrum of [H <sub>4</sub> L-Ru(TFA)(CO)(PPh <sub>3</sub> )]TFA in DMSO-d <sub>6</sub> .                          | S8  |
| Figure S7. <sup>31</sup> P{ <sup>1</sup> H} NMR spectrum of [H <sub>4</sub> L-Ru(TFA)(CO)(PPh <sub>3</sub> )]TFA in DMSO-d <sub>6</sub> .        | S9  |
| Figure S8. <sup>13</sup> C{ <sup>1</sup> H} NMR spectrum of [H <sub>4</sub> L-Ru(TFA)(CO)(PPh <sub>3</sub> )]TFA in DMSO-d <sub>6</sub> .        | S10 |
| Figure S9. <sup>1</sup> H NMR spectrum of [Bu <sub>4</sub> L-RuCl(CO) <sub>2</sub> ]Cl in DMSO-d <sub>6</sub> .                                  | S11 |
| Figure S10. <sup>31</sup> P{ <sup>1</sup> H} NMR spectrum of [Bu <sub>4</sub> L-RuCl(CO) <sub>2</sub> ]Cl in DMSO-d <sub>6</sub> .               | S12 |
| Figure S11. <sup>13</sup> C{ <sup>1</sup> H} NMR spectrum of [Bu <sub>4</sub> L-RuCl(CO) <sub>2</sub> ]Cl in DMSO-d <sub>6</sub> .               | S13 |
| Figure S12. <sup>1</sup> H NMR spectrum of [H <sub>4</sub> L-RuCl(CO) <sub>2</sub> ]TFA in DMSO-d <sub>6</sub> .                                 | S14 |
| Figure S13. <sup>31</sup> P{ <sup>1</sup> H} NMR spectrum of [H <sub>4</sub> L-RuCl(CO) <sub>2</sub> ]TFA in DMSO-d <sub>6</sub> .               | S15 |
| Figure S14. <sup>13</sup> C{ <sup>1</sup> H} NMR spectrum of [H <sub>4</sub> L-RuCl(CO) <sub>2</sub> ]TFA in DMSO-d <sub>6</sub> .               | S16 |
| Figure S15. <sup>31</sup> P{ <sup>1</sup> H} NMR spectrum of <i>cis/trans</i> -Bu <sub>4</sub> L-RuCl <sub>2</sub> (CO) in DMSO-d <sub>6</sub> . | S17 |
| Figure S16. <sup>1</sup> H NMR spectrum of <i>cis/trans</i> -Bu <sub>4</sub> L-RuCl <sub>2</sub> (CO) in DMSO-d <sub>6</sub> .                   | S18 |
| Figure S17. <sup>1</sup> H NMR spectrum of <i>cis/trans</i> -H <sub>4</sub> L-RuCl <sub>2</sub> (CO) in DMSO-d <sub>6</sub> .                    | S19 |
| Figure S18. <sup>31</sup> P{ <sup>1</sup> H} NMR spectrum of <i>cis/trans</i> -H <sub>4</sub> L-RuCl <sub>2</sub> (CO) in DMSO-d <sub>6</sub> .  | S20 |
| Figure S19. ATR-IR spectra of Bu <sub>4</sub> L-Ru-P <sup>N</sup> N <sup>N</sup> P pincer complexes                                              | S21 |
| Figure S20. ATR-IR spectra of H <sub>4</sub> L-Ru-P <sup>N</sup> N <sup>N</sup> P pincer complexes                                               | S22 |
| Figure S21. ATR-IR spectra of RuCl <sub>2</sub> (CO) <sub>3</sub> (HCO <sub>2</sub> H) and RuCl <sub>2</sub> (CO) <sub>3</sub> (THF)             | S23 |
| Synchrotron X-ray Powder Diffraction, Structure Solution, and Rietveld Refinement of 1                                                           | S24 |
| Table S1. Fractional coordinates of the asymmetric unit for framework structure 1.                                                               | S24 |
| Pawley refinement of 1.                                                                                                                          | S25 |
| Table S2. Pawley refinement parameters for 1 in <i>P6/mmm</i> space group.                                                                       | S25 |
| Figure S22. CsF- and acid-digested <sup>31</sup> P{ <sup>1</sup> H} NMR spectra of 1, 2 and 3.                                                   | S26 |
| Figure S23. CsF-digested <sup>1</sup> H NMR spectrum (DMSO-d <sub>6</sub> /D <sub>2</sub> O) of 1 after MeOH solvent exchange.                   | S27 |
| Figure S24. CsF-digested <sup>1</sup> H NMR spectrum (DMSO-d <sub>6</sub> /D <sub>2</sub> O) of 1 after activation.                              | S28 |
| Figure S25. CsF-digested <sup>31</sup> P{ <sup>1</sup> H} NMR spectrum (DMSO-d <sub>6</sub> /D <sub>2</sub> O) of 1 after activation.            | S29 |
| Figure S26. <sup>31</sup> P{ <sup>1</sup> H} NMR spectrum for MOF reaction supernatant of 1.                                                     | S30 |
| Figure S27. Solid-state NMR spectra of 1, 2 and 3.                                                                                               | S31 |

|                                                                                                                                                       |     |
|-------------------------------------------------------------------------------------------------------------------------------------------------------|-----|
| Figure S28. Acid-digested $^1\text{H}$ NMR spectrum ( $\text{CF}_3\text{CO}_2\text{H}/\text{DMSO}-d_6$ ) of 2 after THF washing. ....                 | S32 |
| Figure S29. Acid-digested $^1\text{H}$ NMR spectrum ( $\text{CF}_3\text{CO}_2\text{H}/\text{DMSO}-d_6$ ) of 2 after activation.....                   | S33 |
| Figure S30. Acid-digested $^{31}\text{P}\{^1\text{H}\}$ NMR spectrum ( $\text{CF}_3\text{CO}_2\text{H}/\text{DMSO}-d_6$ ) of 2 after activation. .... | S34 |
| Figure S31. Acid-digested $^1\text{H}$ NMR spectrum ( $\text{CF}_3\text{CO}_2\text{H}/\text{DMSO}-d_6$ ) of 3 after MeOH solvent exchange.....        | S35 |
| Figure S32. Solid-state $^{31}\text{P}$ and $^{13}\text{C}$ NMR spectra of MOF 3 synthesized with $\text{HCO}_2\text{H}$ as the modulator. ....       | S36 |
| Figure S33. TGA for MeOH soaked sample of 1 measured at a ramp rate of $5\text{ }^\circ\text{C}/\text{min}$ under flowing $\text{N}_2$ .....          | S37 |
| Figure S34. TGA for MeOH soaked sample of 3 measured at a ramp rate of $5\text{ }^\circ\text{C}/\text{min}$ under flowing $\text{N}_2$ .....          | S38 |
| Figure S35. TGA for THF-exchanged sample of 2 measured at ramp rate of $5\text{ }^\circ\text{C}/\text{min}$ under flowing $\text{N}_2$ .....          | S39 |
| Figure S36. XRPD patterns for as synthesized, THF and MeOH solvent exchanged samples of 2. ....                                                       | S40 |
| Figure S37. $\text{N}_2$ adsorption isotherm (77 K) for MeOH soaked sample of 1 .....                                                                 | S41 |
| Figure S38. $\text{N}_2$ adsorption isotherm (77 K) for THF soaked sample of 2 .....                                                                  | S42 |
| Figure S39. $\text{N}_2$ adsorption isotherm (77 K) for MeOH soaked sample of 3 .....                                                                 | S43 |
| Figure S40. XRPD patterns for activated samples of 1, 2 and 3.....                                                                                    | S44 |
| Figure S41. ATR-IR spectra for samples of 1, 3 (MeOH soaked), and 2 (THF soaked). ....                                                                | S45 |
| Figure S42. ATR-IR spectra for 2 before and after activation. ....                                                                                    | S46 |
| Figure S43. Diffuse reflectance IR spectra of 2 at room temperature and have heating to 100 and $150\text{ }^\circ\text{C}$ .....                     | S47 |
| Figure S44. ATR-IR spectra of 2, 2-a, and 2-b.....                                                                                                    | S48 |
| Figure S45. XRPD patterns of 2, 2-a and 2-b.....                                                                                                      | S49 |
| Figure S46. XRPD patterns of 1 and 1-KO <sup>t</sup> Bu.....                                                                                          | S50 |
| Figure S47. XRPD patterns of 3 and 3-KO <sup>t</sup> Bu.....                                                                                          | S51 |
| Figure S48. ATR-IR spectra for $[\text{tBu}_4\text{L-RuCl}(\text{CO})_2]\text{Cl}$ reaction with KO <sup>t</sup> Bu and $\text{Me}_3\text{NO}$ .....  | S52 |
| Figure S49. ATR-IR spectra for 2-b before and after catalysis, and regeneration of 2-b with $\text{Me}_3\text{NO}$ .....                              | S53 |
| Table S3. Hydrosilylation of aryl aldehydes catalyzed by 2-b .....                                                                                    | S54 |
| Figure S50. $^1\text{H}$ NMR spectrum for hydrosilylation of benzaldehyde with 2-b. ....                                                              | S55 |
| Figure S51. GC/MS chromatogram for the hydrosilylation of benzaldehyde with 2-b .....                                                                 | S56 |
| Figure S52. $^1\text{H}$ NMR spectrum for hydrosilylation of benzaldehyde with 2.....                                                                 | S57 |
| Figure S53. $^1\text{H}$ NMR spectrum for hydrosilylation of benzaldehyde with 2-a.....                                                               | S58 |
| Figure S54. $^1\text{H}$ NMR spectrum for hydrosilylation of benzaldehyde with 2 treated with $\text{Me}_3\text{NO}$ .....                            | S59 |
| Figure S55. $^1\text{H}$ NMR spectrum for hydrosilylation of benzaldehyde with 1 .....                                                                | S60 |
| Figure S56. $^1\text{H}$ NMR spectrum for hydrosilylation of benzaldehyde with 1-KO <sup>t</sup> Bu. ....                                             | S61 |
| Figure S57. $^1\text{H}$ NMR spectrum for hydrosilylation of benzaldehyde with 3.....                                                                 | S62 |
| Figure S58. $^1\text{H}$ NMR spectrum for hydrosilylation of benzaldehyde with 3-KO <sup>t</sup> Bu. ....                                             | S63 |
| Figure S59. $^1\text{H}$ NMR spectrum for hydrosilylation of benzaldehyde with $[\text{tBu}_4\text{L-RuCl}(\text{CO})_2]\text{Cl}$ .....              | S64 |
| Figure S60. $^1\text{H}$ NMR spectrum for hydrosilylation of benzaldehyde with <i>cis/trans</i> - $\text{tBu}_4\text{L-RuCl}_2(\text{CO})$ .....      | S65 |
| Figure S61. $^1\text{H}$ NMR spectrum for hydrosilylation of benzaldehyde with $\text{tBu}_4\text{L-RuCl}(\text{CO})$ .....                           | S66 |
| Figure S62. $^1\text{H}$ NMR spectra before and after hot filtration for hydrosilylation of benzaldehyde with 2-b.....                                | S67 |
| Figure S63. $^1\text{H}$ NMR spectrum for hydrosilylation of o-anisaldehyde with 2-b .....                                                            | S68 |
| Figure S64. GC/MS chromatogram for the hydrosilylation of O-anisaldehyde with 2-b.....                                                                | S69 |
| Figure S65. $^1\text{H}$ NMR spectrum for hydrosilylation of 4-methylbenzaldehyde with 2-b .....                                                      | S70 |

|                                                                                                               |     |
|---------------------------------------------------------------------------------------------------------------|-----|
| Figure S66. GC/MS chromatogram for the hydrosilylation of 4-methylbenzaldehyde with 2-b.....                  | S71 |
| Figure S67. <sup>1</sup> H NMR spectrum for hydrosilylation of 4-(Trifluoromethyl)benzaldehyde with 2-b. .... | S72 |
| Figure S68. GC/MS chromatogram for the hydrosilylation of 4-(Trifluoromethyl)benzaldehyde with 2-b .....      | S73 |
| Figure S69. <sup>1</sup> H NMR spectrum for for the hydrosilylation of 4-methoxybenzaldehyde with 2-b. ....   | S74 |
| Figure S70. GC/MS chromatogram for the hydrosilylation of 4-methoxybenzaldehyde with 2-b. ....                | S75 |
| Figure S71. <sup>1</sup> H NMR spectrum for the hydrosilylation of 3,5-dibenzyloxybenzaldehyde with 2-b.....  | S76 |
| Figure S72. GC/MS chromatogram for the hydrosilylation of 3,5-dibenzyloxybenzaldehyde with 2-b. ....          | S77 |
| Figure S73. <sup>1</sup> H NMR spectrum for the hydrosilylation of acetophenone with 2-b.....                 | S78 |
| Figure S74. GC/MS chromatogram for the hydrosilylation of acetophenone with 2-b. ....                         | S79 |
| REFERENCES. ....                                                                                              | S80 |

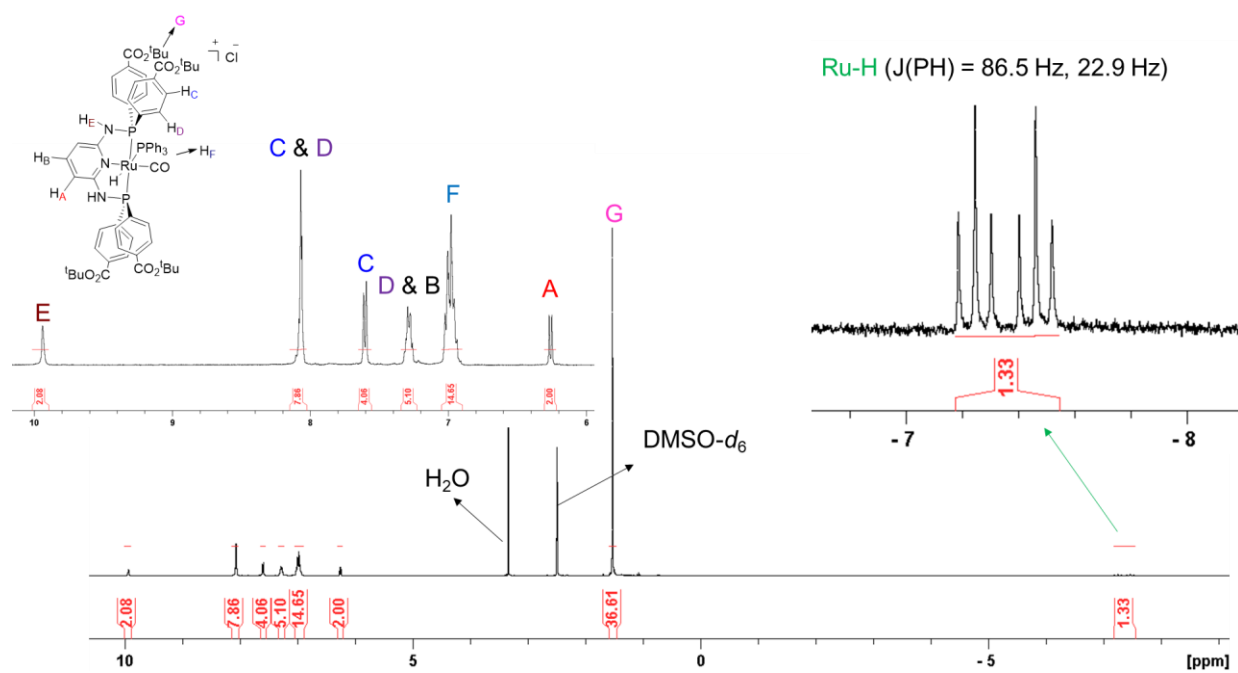

**Figure S1.**  $^1\text{H}$  NMR spectrum of  $[\text{tBu}_4\text{L-RuH(CO)(PPh}_3\text{)}]\text{Cl}$  in DMSO-d<sub>6</sub>.

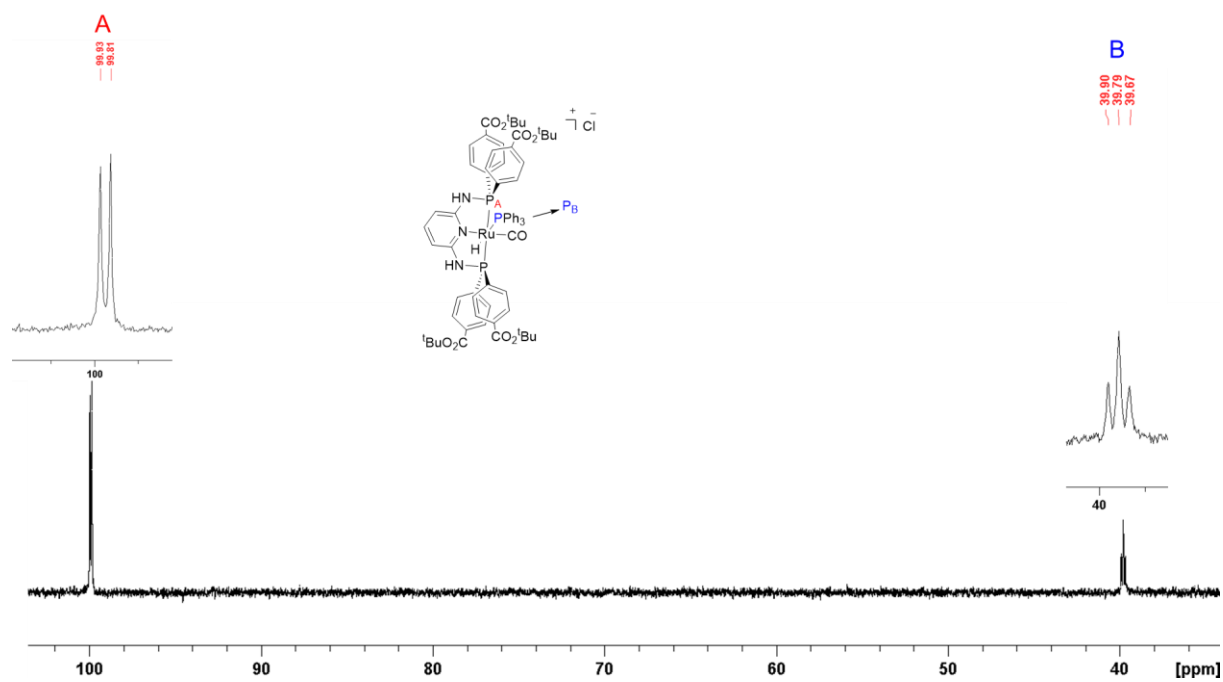

**Figure S2.**  $^{31}\text{P}\{^1\text{H}\}$  NMR spectrum of  $[\text{tBu}_4\text{L-RuH(CO)(PPh}_3\text{)}]\text{Cl}$  in  $\text{DMSO-d}_6$ .

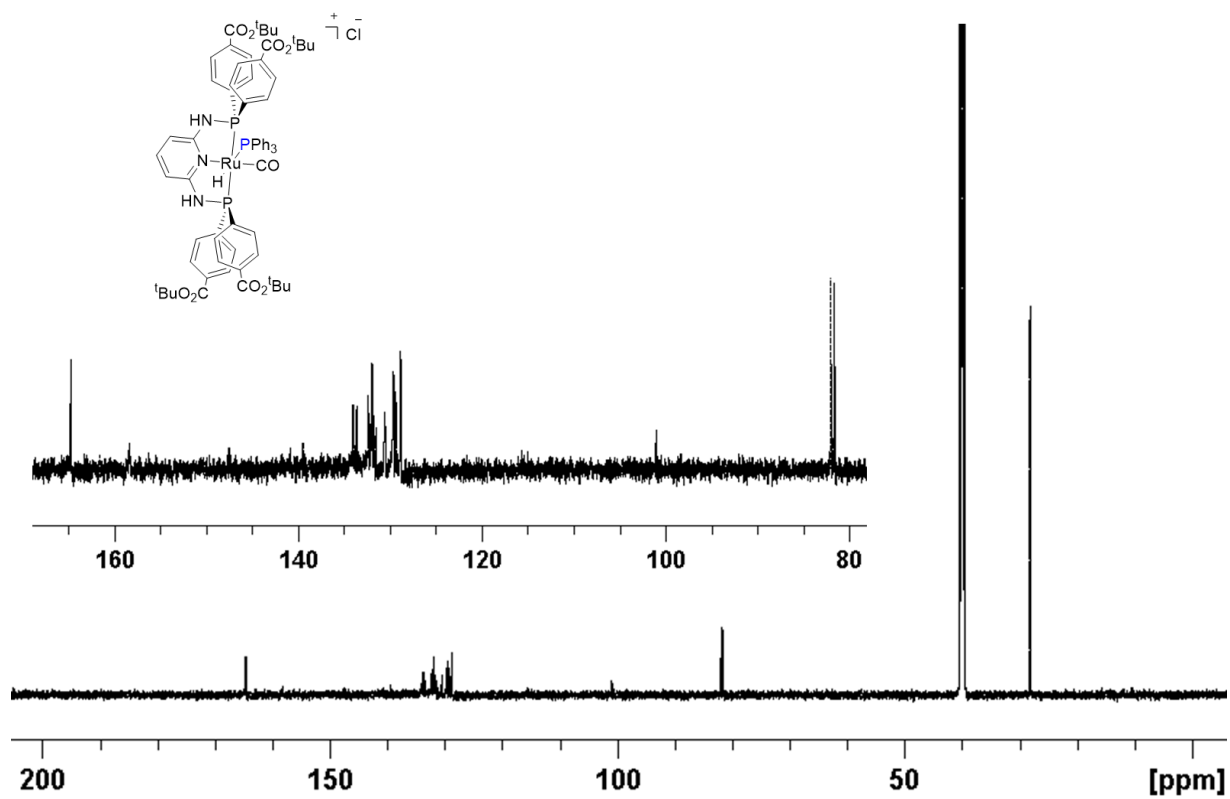

**Figure S3.**  $^{13}\text{C}\{^1\text{H}\}$  NMR spectrum of  $[\text{tBu}_4\text{L-RuH(CO)(PPh}_3\text{)]Cl}$  in  $\text{DMSO-d}_6$ .



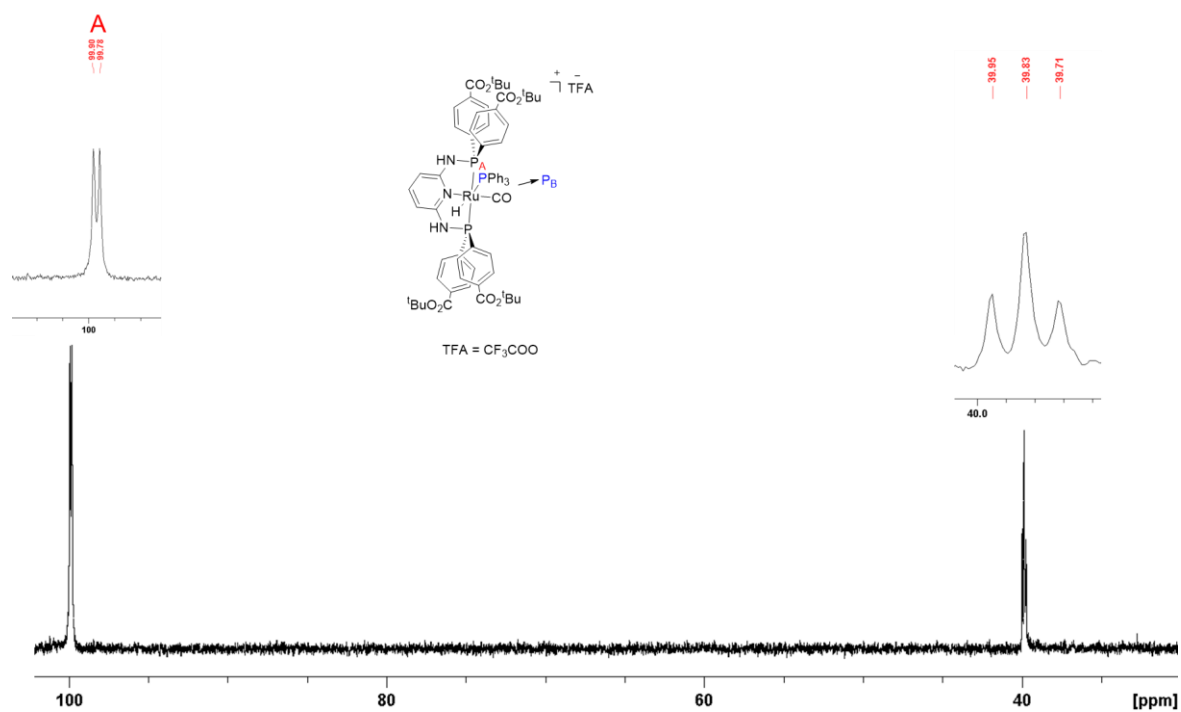

**Figure S5.**  $^{31}\text{P}\{^1\text{H}\}$  NMR spectrum of  $[\text{tBu}_4\text{L-RuH(CO)(PPh}_3\text{)]TFA}$  in  $\text{DMSO-d}_6$ .



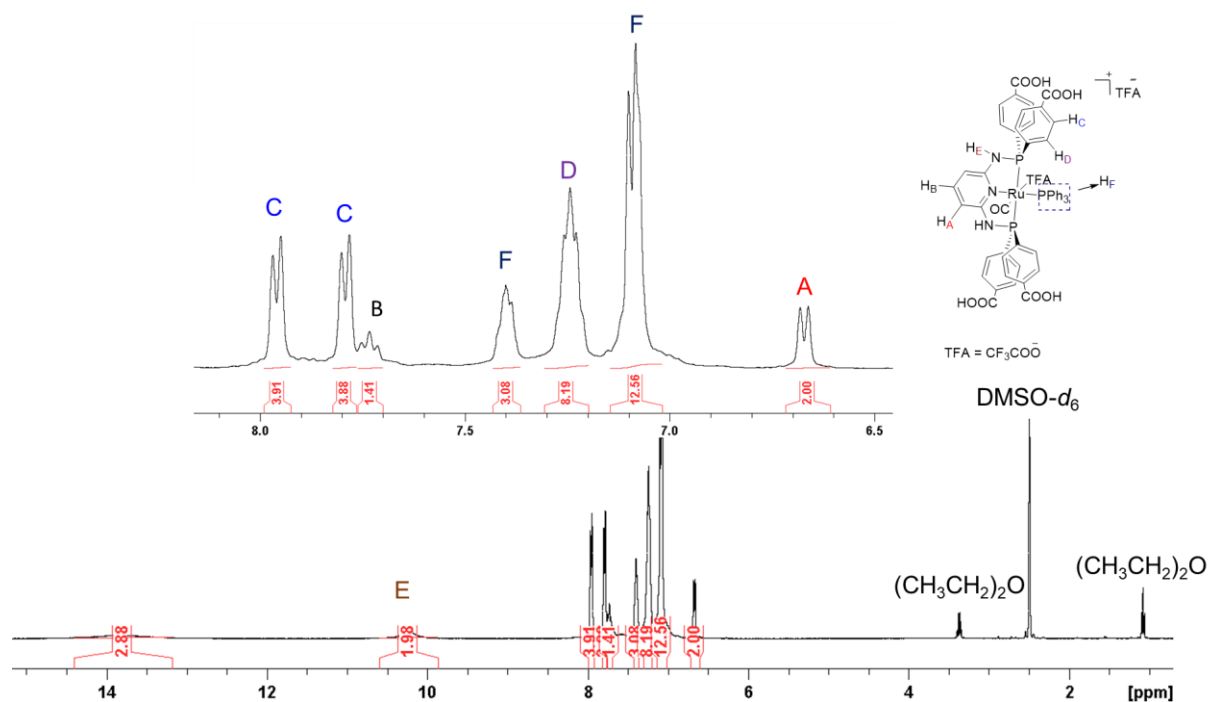

**Figure S6.**  $^1\text{H}$  NMR spectrum of  $[\text{H}_4\text{L-Ru}(\text{TFA})(\text{CO})(\text{PPh}_3)]\text{TFA}$  in  $\text{DMSO-}d_6$ .

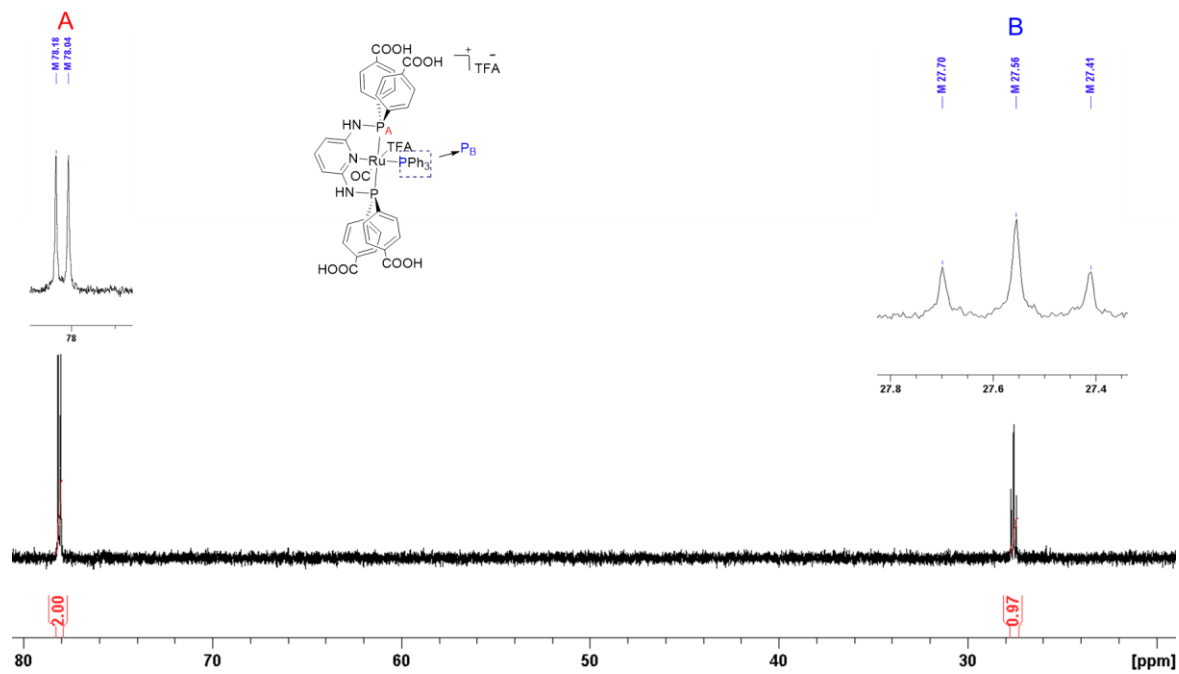

**Figure S7.**  $^{31}\text{P}$   $\{^1\text{H}\}$  NMR spectrum of  $[\text{H}_4\text{L-Ru}(\text{TFA})(\text{CO})(\text{PPh}_3)]\text{TFA}$  in  $\text{DMSO-d}_6$ .

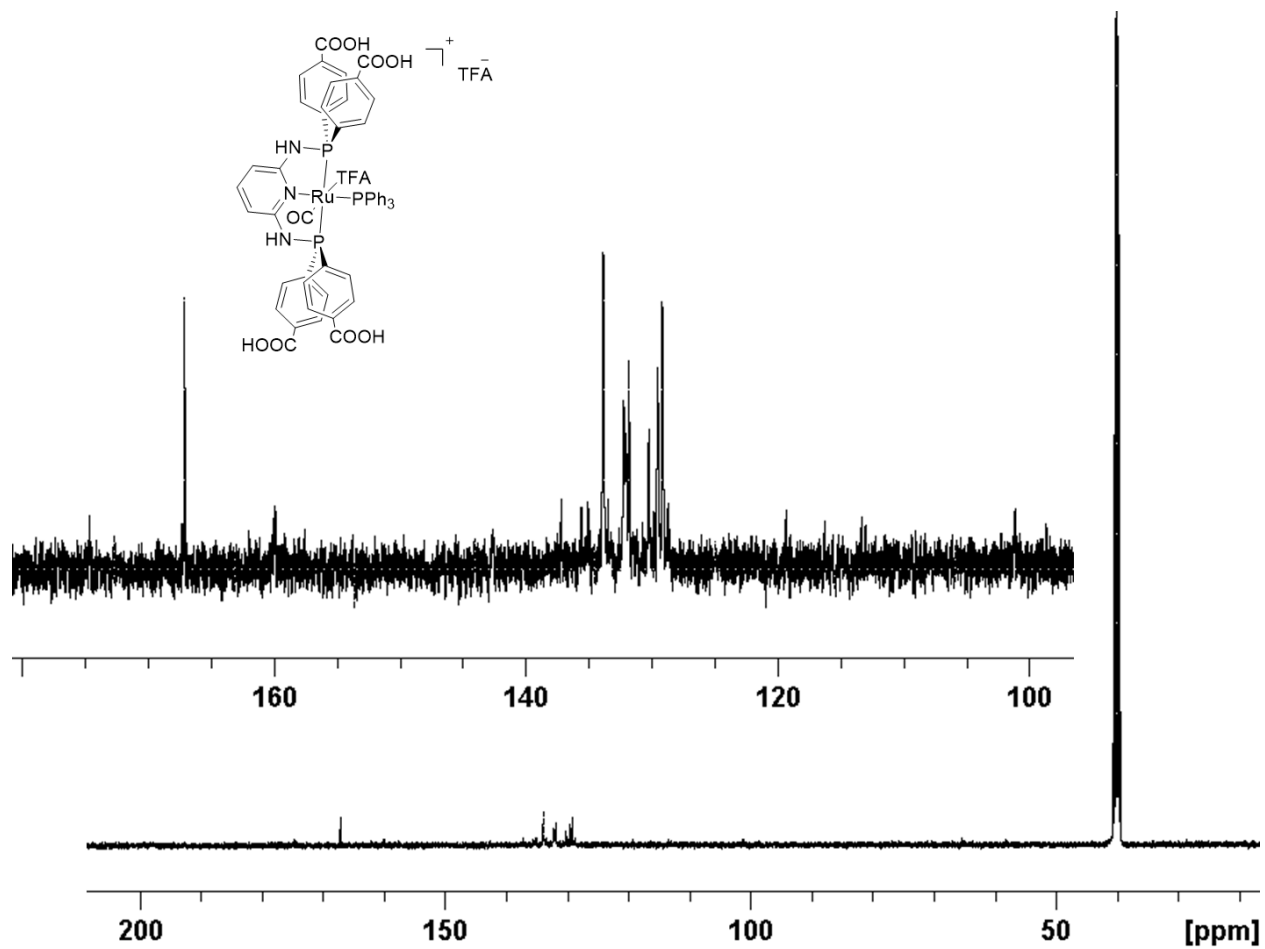

**Figure S8.**  $^{13}C$   $\{^1H\}$  NMR spectrum of  $[H_4L-Ru(TFA)(CO)(PPh_3)]TFA$  in  $DMSO-d_6$ .

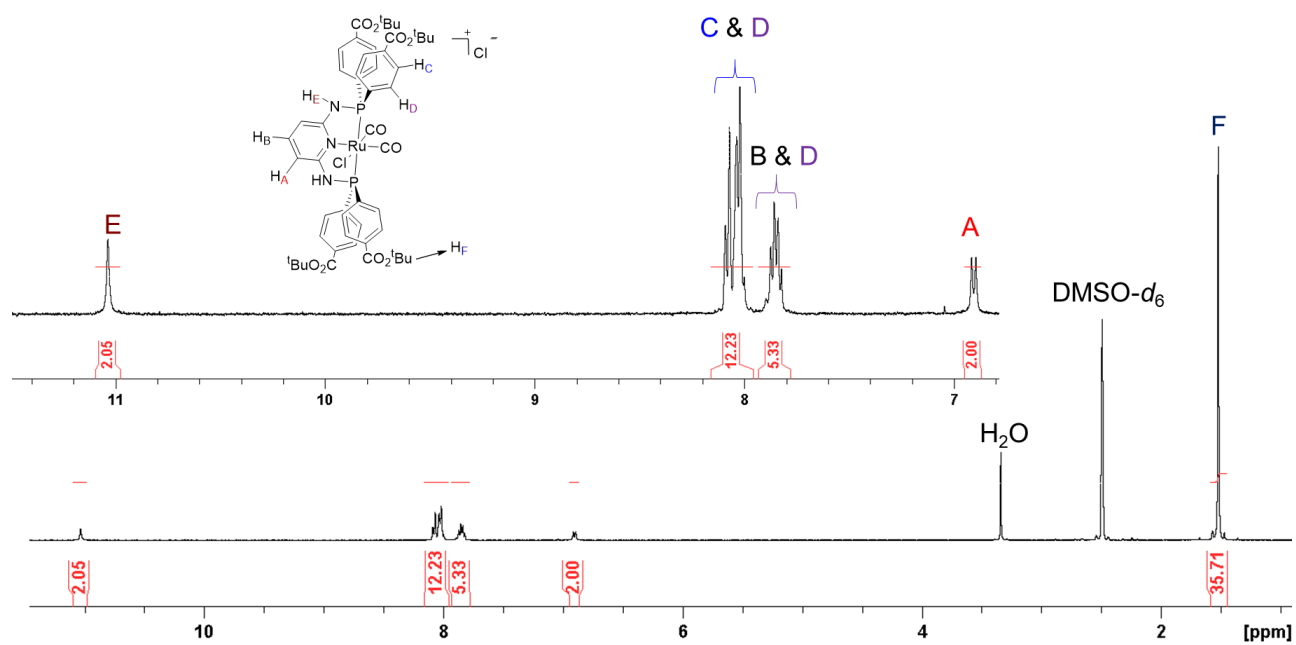

**Figure S9.**  $^1\text{H}$  NMR spectrum of  $[\text{tBu}_4\text{L-RuCl}(\text{CO})_2]\text{Cl}$  in  $\text{DMSO-}d_6$ .

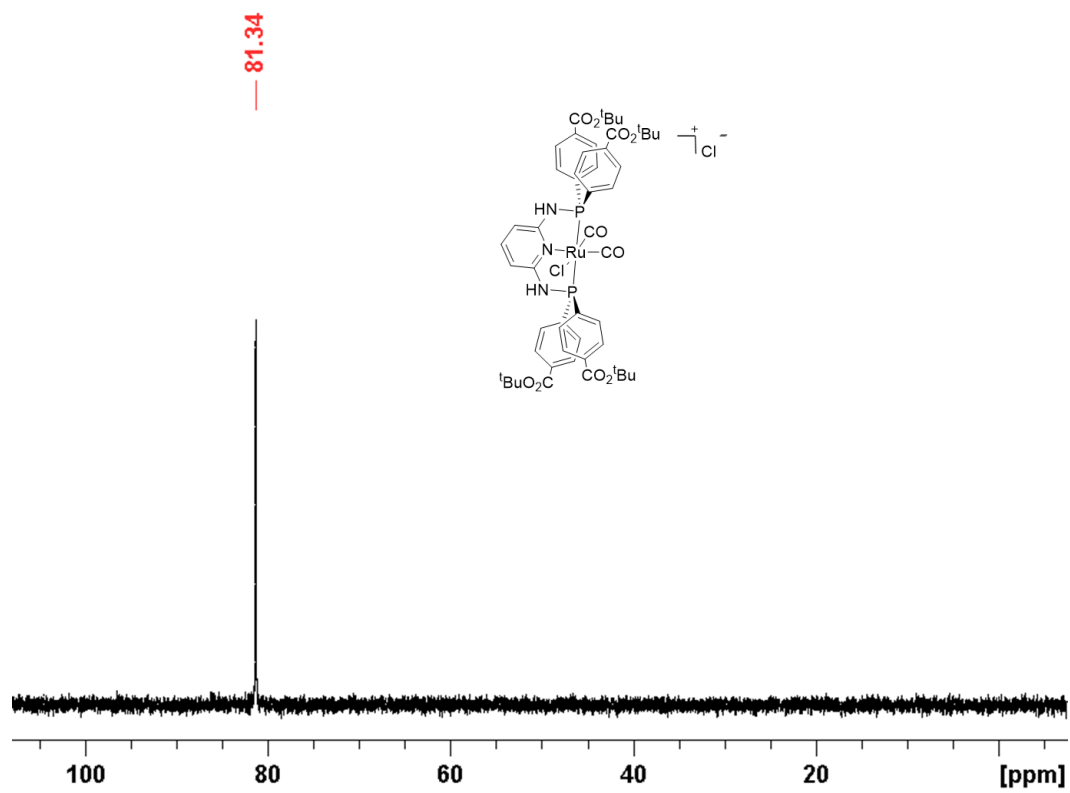

**Figure S10.**  $^{31}\text{P}$   $\{^1\text{H}\}$  NMR spectrum of  $[\text{tBu}_4\text{L-RuCl(CO)}_2]\text{Cl}$  in  $\text{DMSO-d}_6$

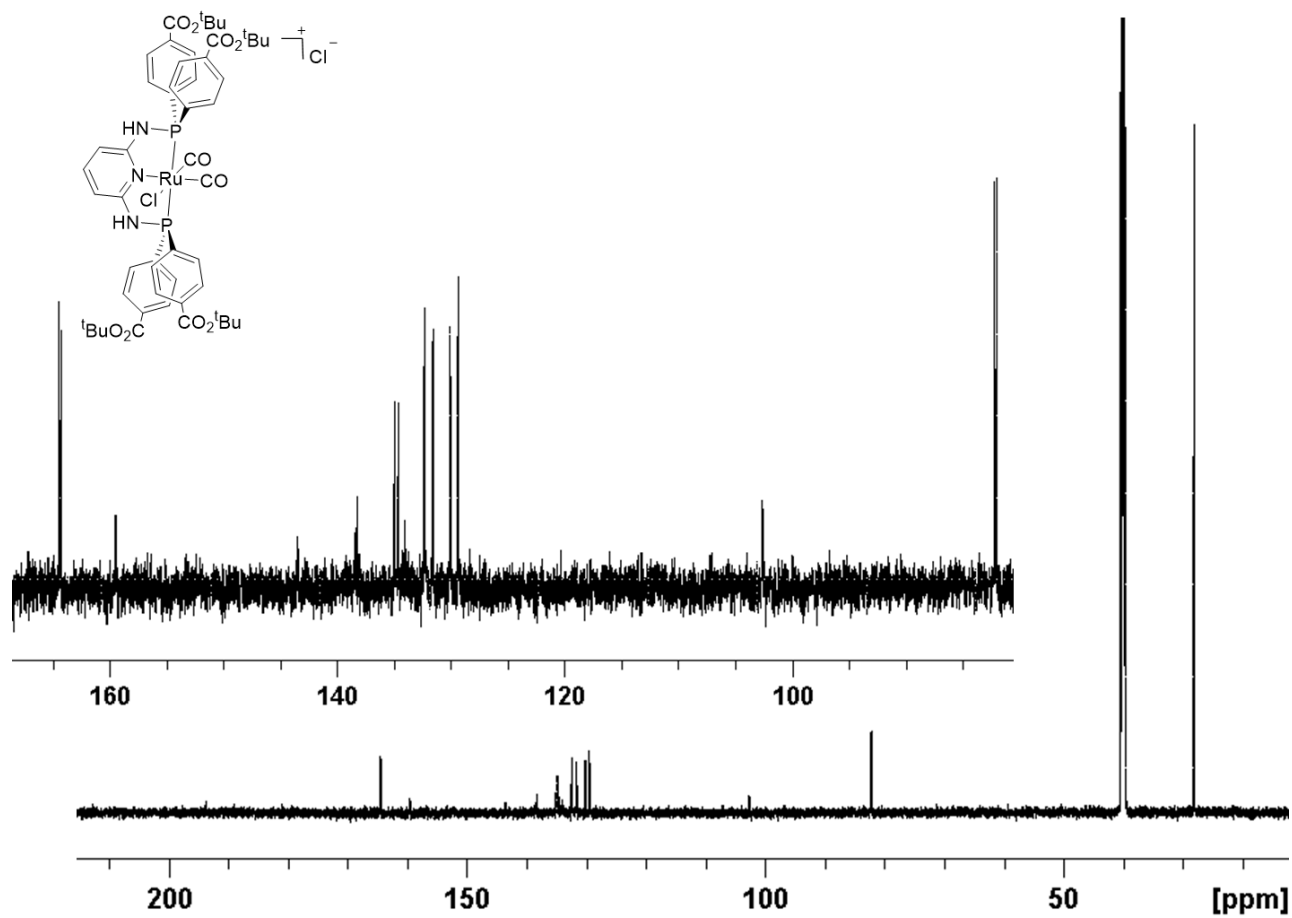

**Figure S11.**  $^{13}\text{C} \{^1\text{H}\}$  NMR spectrum of  $[\text{tBu}_4\text{L-RuCl}(\text{CO})_2]\text{Cl}$  in  $\text{DMSO-d}_6$

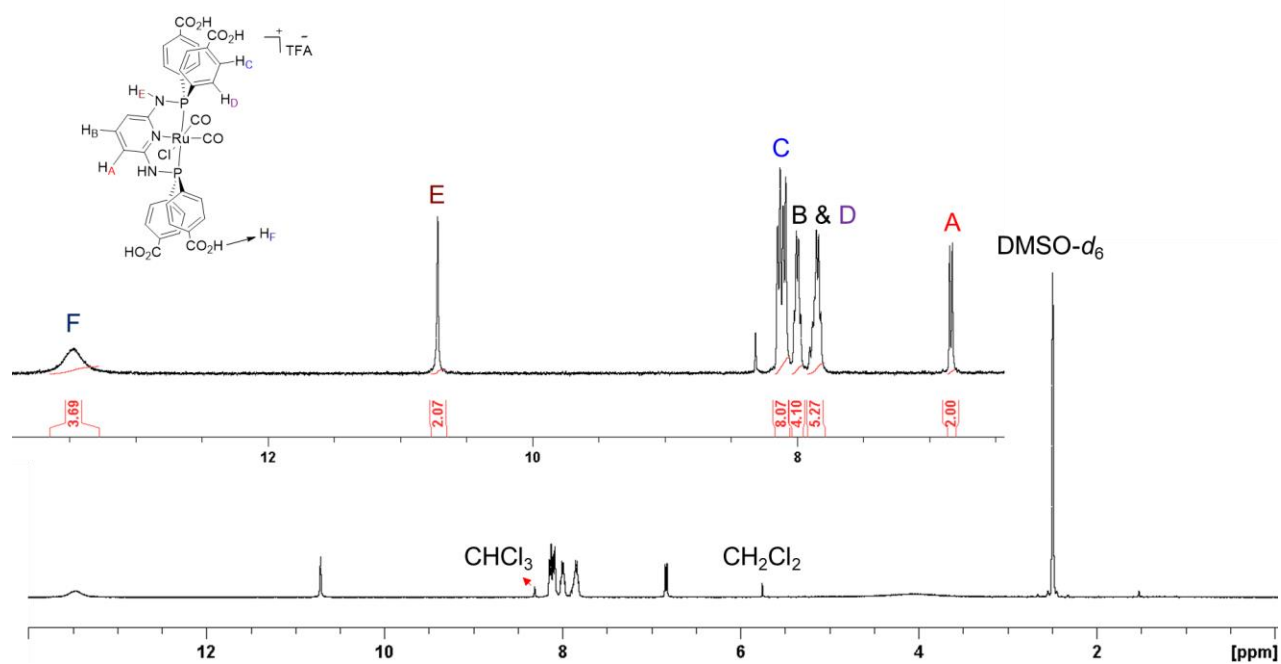

**Figure S12.**  $^1H$  NMR spectrum of  $[H_4L-RuCl(CO)_2]TFA$  in  $DMSO-d_6$ .

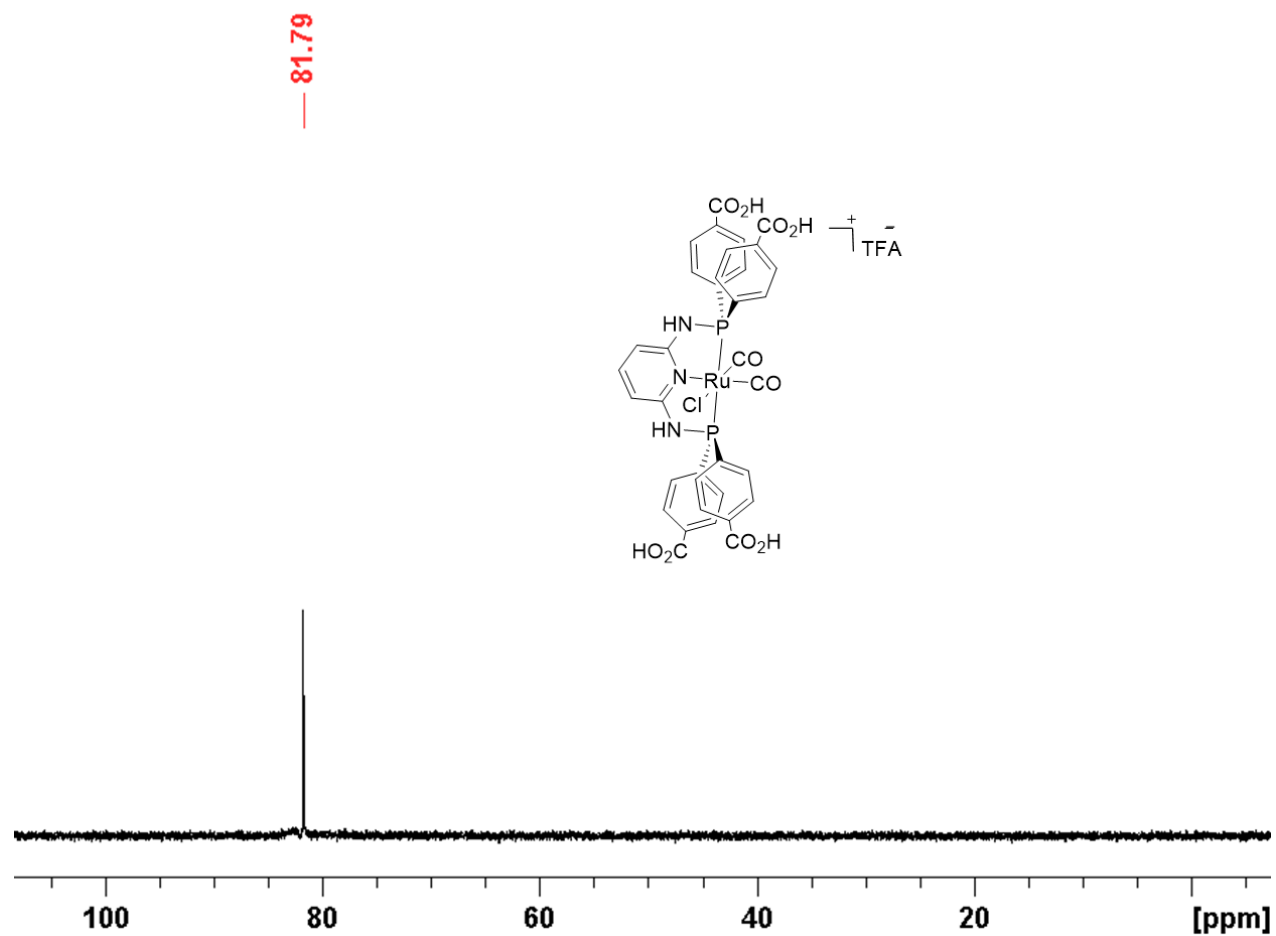

**Figure S13.**  $^{31}P \{^1H\}$  NMR spectrum of  $[H_4L-RuCl(CO)_2]TFA$  in  $DMSO-d_6$ .



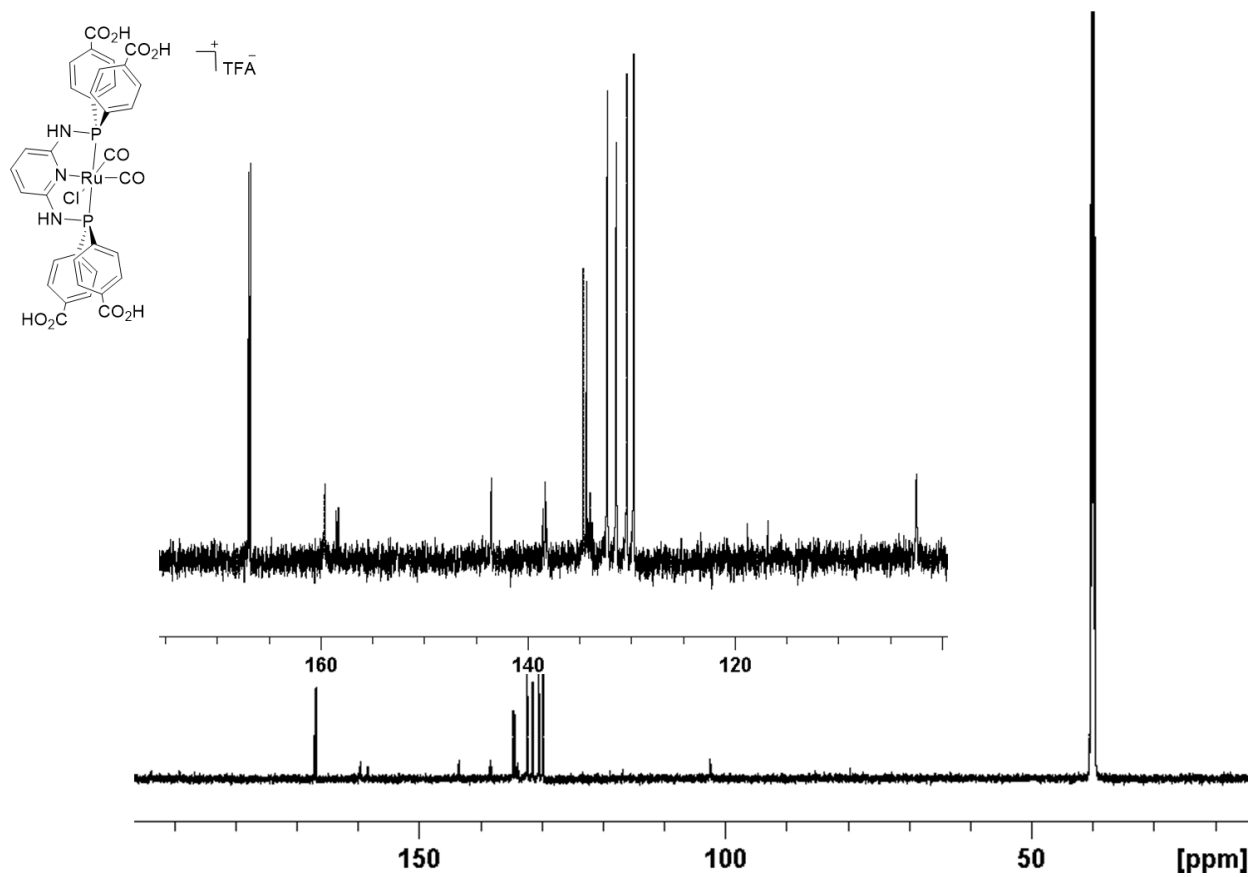

**Figure S14.**  $^{13}C \{^1H\}$  NMR spectrum of  $[H_4L-RuCl(CO)_2]TFA$  in DMSO- $d_6$ .

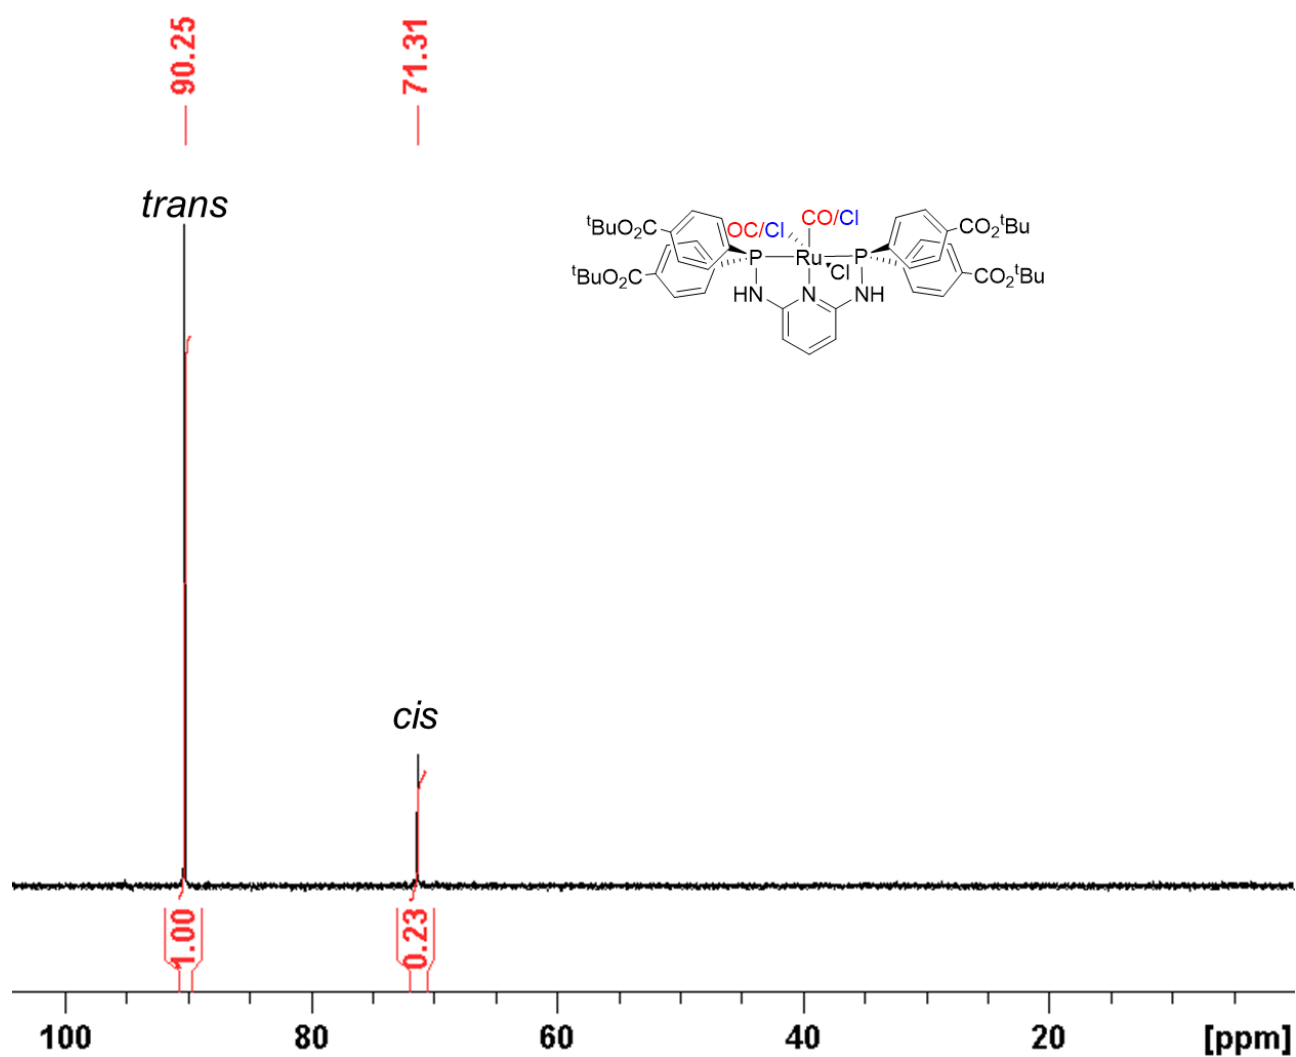

**Figure S15.**  $^{31}\text{P}$   $\{^1\text{H}\}$  NMR spectrum of *cis/trans*- $^t\text{Bu}_4\text{L-RuCl}_2(\text{CO})$  in  $\text{DMSO-d}_6$ .

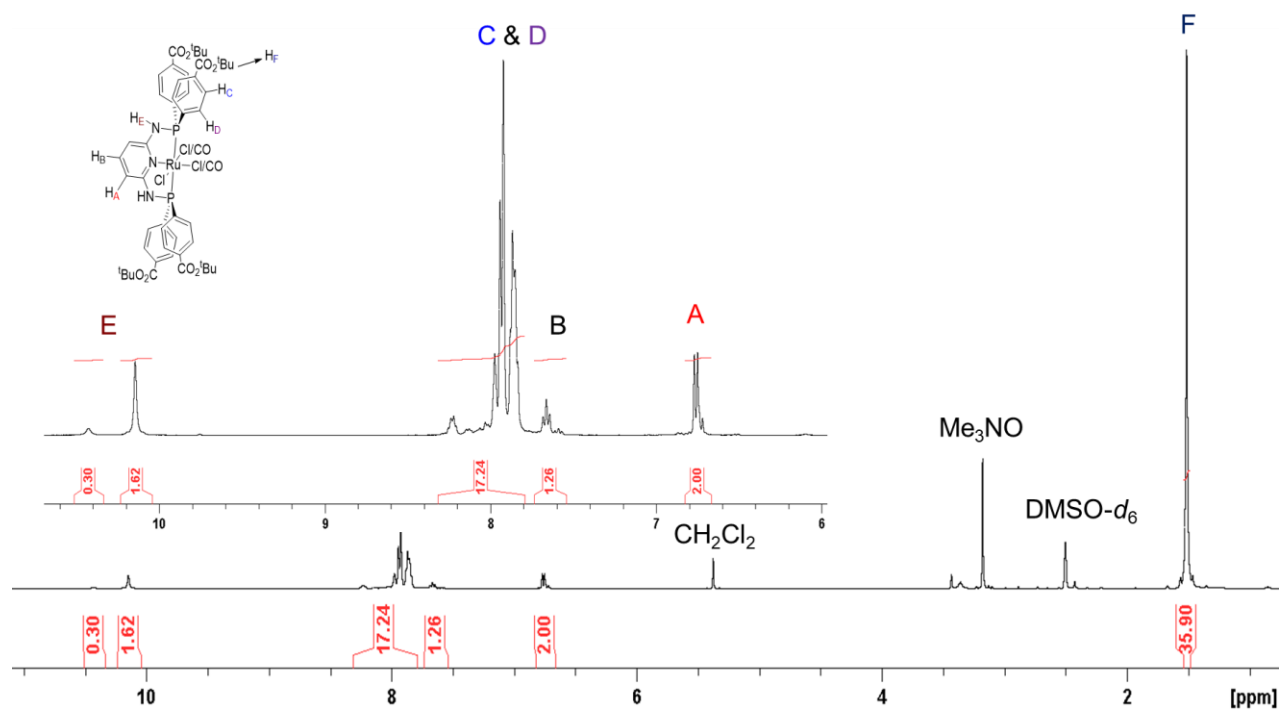

**Figure S16.**  $^1\text{H}$  NMR spectrum of *cis/trans*- $^t\text{Bu}_4\text{L-RuCl}_2(\text{CO})$  in  $\text{DMSO-}d_6$ .

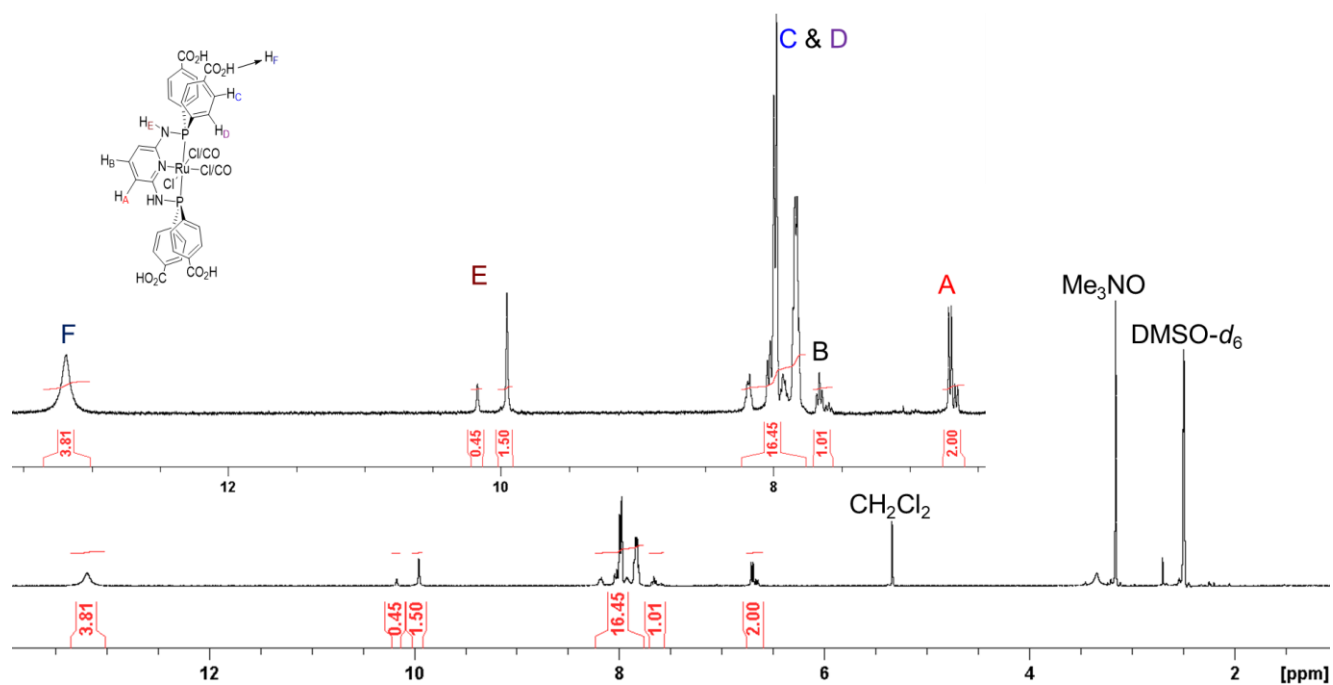

**Figure S17.**  $^1\text{H}$  NMR spectrum of  $\text{cis/trans-H}_4\text{L-RuCl}_2(\text{CO})$  in  $\text{DMSO-d}_6$

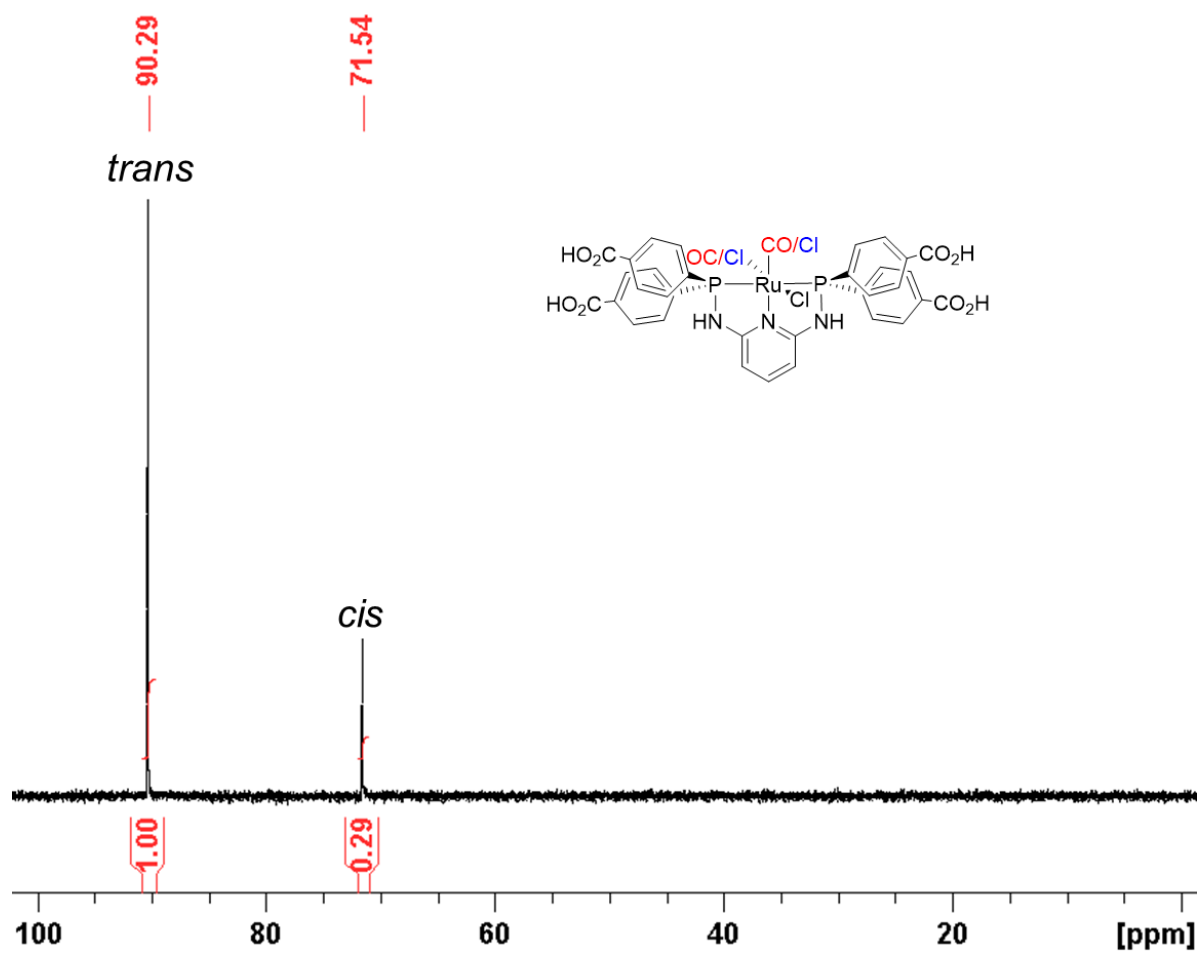

**Figure S18.**  $^{31}\text{P}$   $\{^1\text{H}\}$  NMR spectrum of *cis/trans*-  $\text{H}_4\text{L-RuCl}_2(\text{CO})$  in  $\text{DMSO-d}_6$

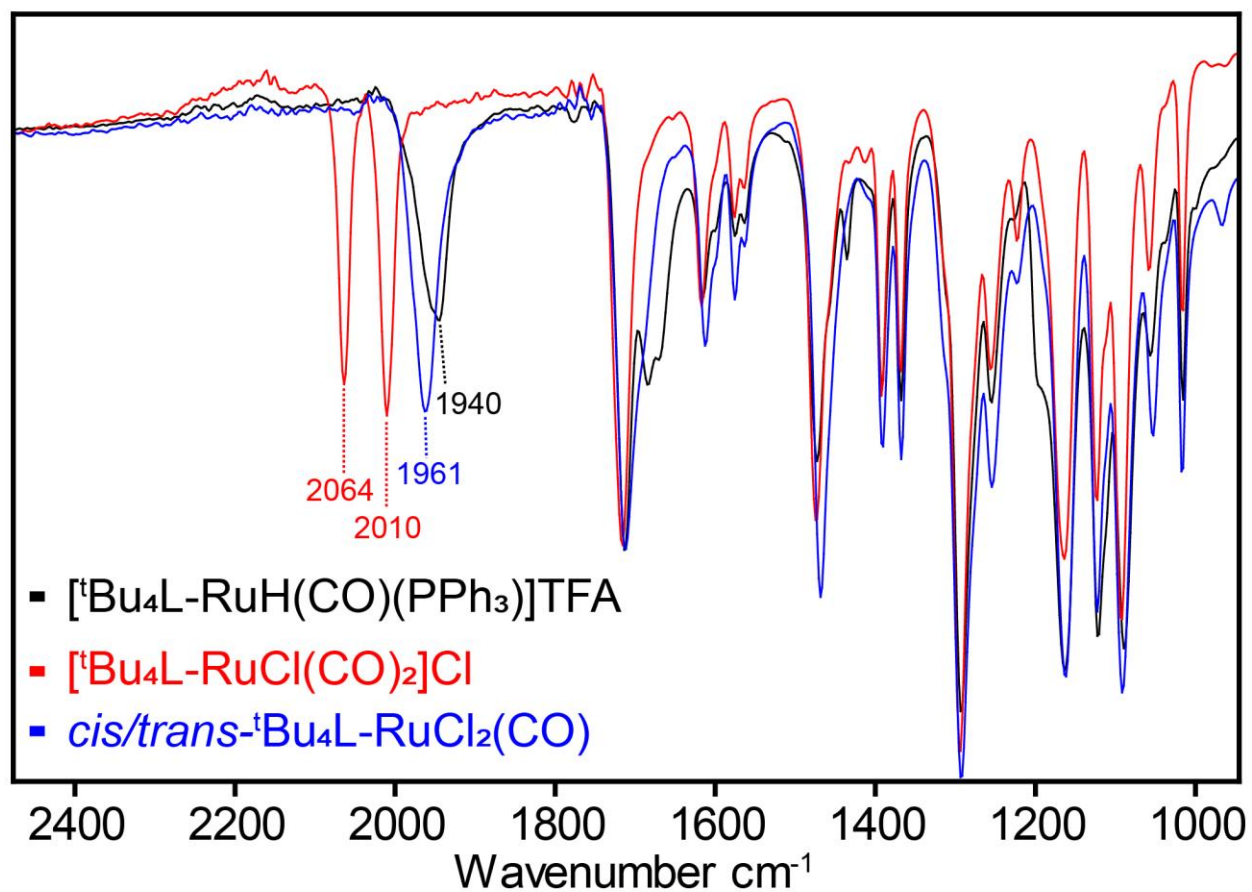

**Figure S19.** ATR-IR spectra of  $\text{tBu}_4\text{L-Ru-P}^{\text{N}}\text{N}^{\text{N}}\text{P}$  pincer complexes

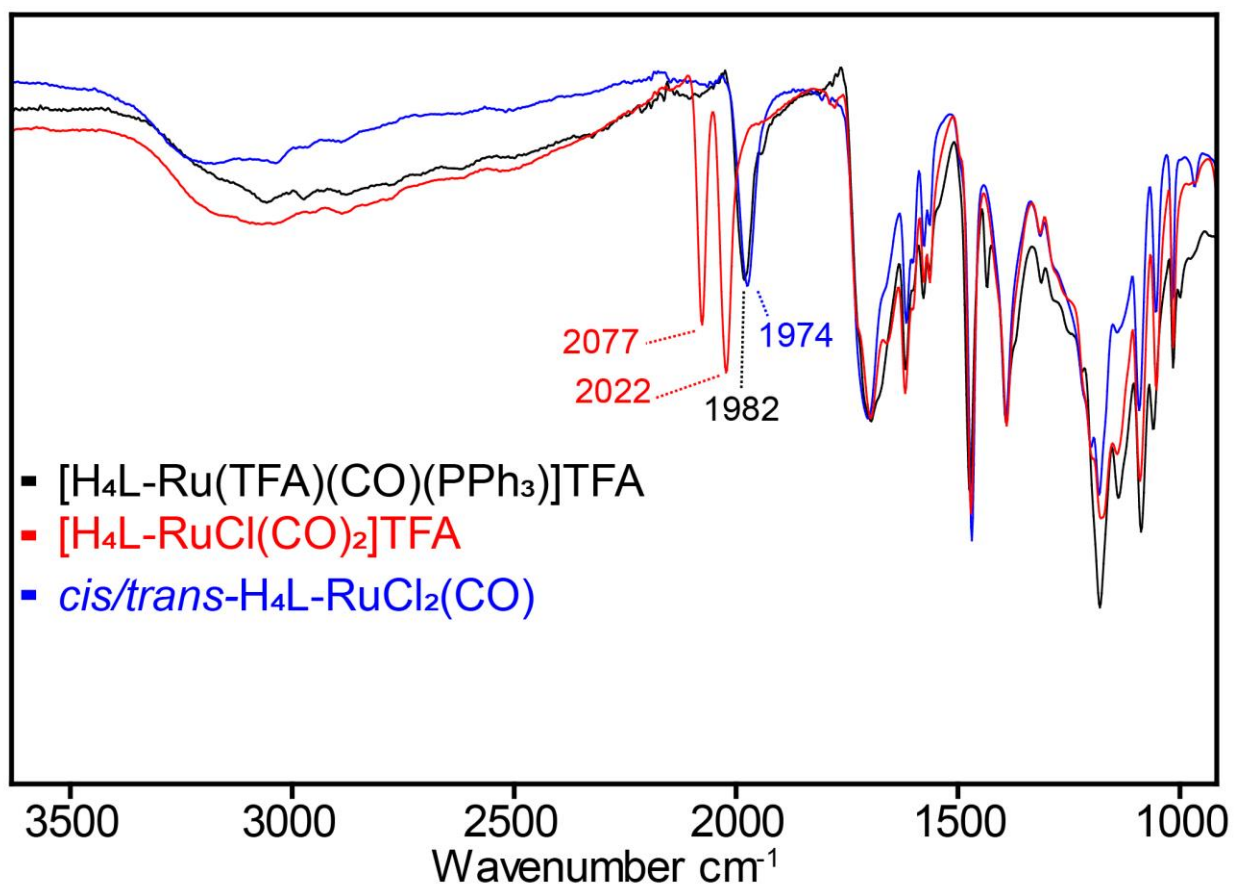

**Figure S20.** ATR-IR spectra of H<sub>4</sub>L-Ru-P<sup>N</sup>N<sup>N</sup>P pincer complexes

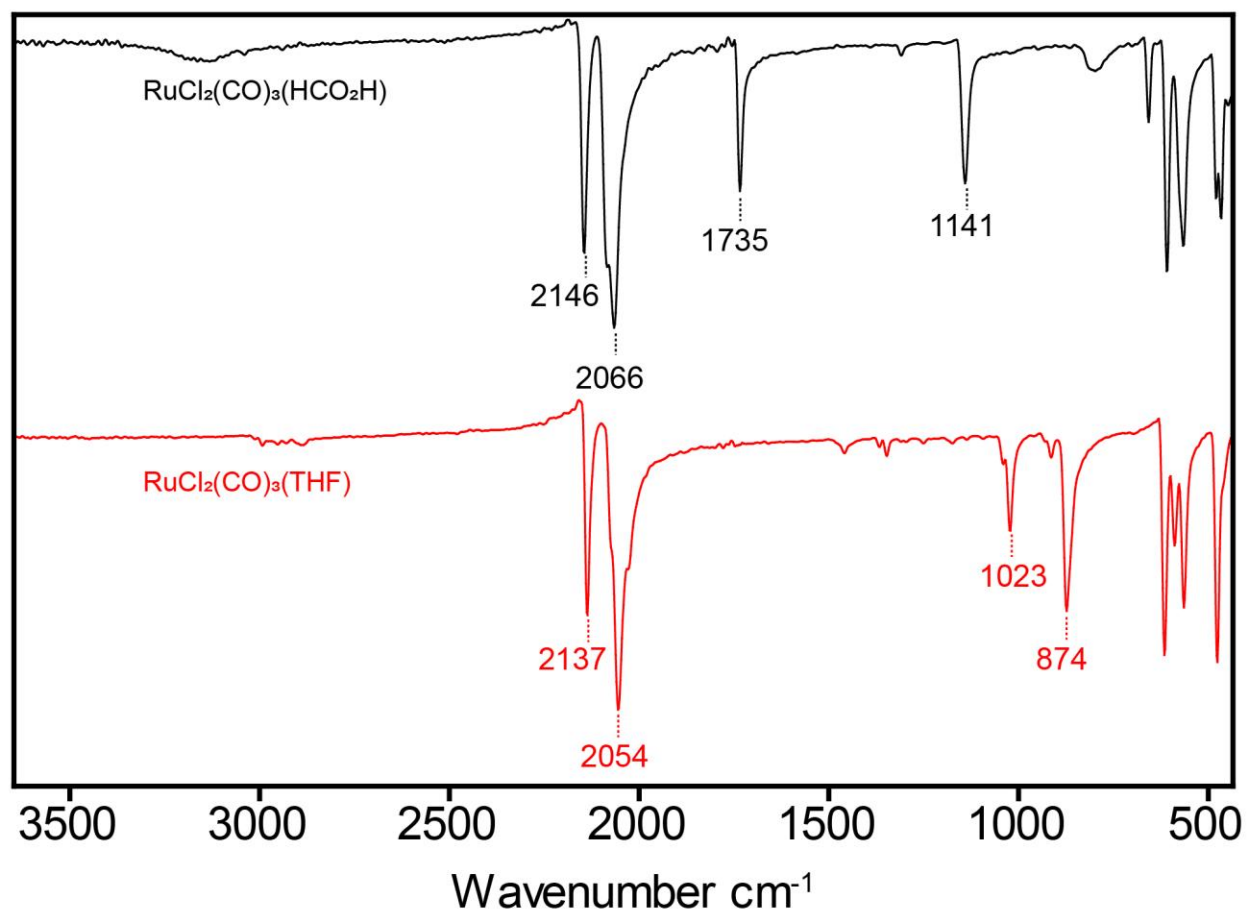

**Figure S21.** ATR-IR spectra of RuCl<sub>2</sub>(CO)<sub>3</sub>(HCO<sub>2</sub>H) and RuCl<sub>2</sub>(CO)<sub>3</sub>(THF)



### Synchrotron X-ray Powder Diffraction, Structure Solution, and Rietveld Refinement of **1**

Synchrotron X-ray Powder diffraction (SXPd) data for **1** was collected on the 11-BM beamline at the Advanced Photon Source (APS, Argonne National Laboratory). Measurements were taken on a powder sample sealed in a 0.8 mm ID Kapton capillary at 298 K using a photon wavelength of  $\lambda = 0.414536$  Å. Subsequent Pawley fits and Rietveld refinement were performed using TOPAS-Academic (v6) over the data range  $2\theta = 0.5 - 10.0^\circ$  and  $0.5 - 20.0^\circ$ , respectively. Indexing the SXPd data gave a hexagonal unit cell ( $a = 31.937(7)$  Å,  $c = 15.798(4)$  Å) with  $P6/mmm$  as a possible space group. An initial structure model was constructed with  $P6/mmm$  space group symmetry and Rietveld refinement was carried out using simulated annealing with two rigid bodies, a  $D_{4h}$   $Zr_6O_4(OH)_4(OAc)_4$  cluster and idealized  $[L-RuCl_3]^{4-}$  linker. The position and orientation of each rigid body is constrained by symmetry; the torsion angles of the benzoate group were allowed to freely refine, as described previously.<sup>1</sup> Constraints were placed on the Zr-acetate and Zr-benzoate bond distances, to guarantee chemically reasonable Zr-O bond lengths. The best fit to the data provided  $R_{wp} = 14.03$  with final lattice parameters of  $a = 31.9437(6)$  Å,  $c = 15.8051(3)$  Å.

**Table S1.** Fractional coordinates of the asymmetric unit for framework structure **1**.

| Label            | Element | Xfrac    | Yfrac    | Zfrac     |
|------------------|---------|----------|----------|-----------|
| Ru               | Ru      | 0.186100 | 0.372200 | 0.000000  |
| Cl <sub>a</sub>  | Cl      | 0.229870 | 0.459741 | 0.000000  |
| Cl <sub>b</sub>  | Cl      | 0.110287 | 0.372200 | 0.000000  |
| P1               | P       | 0.181952 | 0.363905 | -0.148726 |
| N1               | N       | 0.152066 | 0.304132 | -0.147269 |
| C1               | C       | 0.137403 | 0.274806 | -0.074540 |
| C2               | C       | 0.111950 | 0.223900 | -0.076341 |
| C3               | C       | 0.099062 | 0.198124 | 0.000274  |
| N2               | N       | 0.149818 | 0.299637 | 0.000101  |
| C11              | C       | 0.151269 | 0.390328 | 0.205106  |
| C12              | C       | 0.161653 | 0.437831 | 0.190923  |
| C13              | C       | 0.136862 | 0.456403 | 0.236143  |
| C14              | C       | 0.101685 | 0.427469 | 0.295546  |
| C15              | C       | 0.091301 | 0.379966 | 0.309729  |
| C16              | C       | 0.116093 | 0.361394 | 0.264509  |
| C17              | C       | 0.075075 | 0.447403 | 0.344083  |
| O11              | O       | 0.054313 | 0.430335 | 0.409705  |
| O12              | O       | 0.076722 | 0.485714 | 0.307436  |
| Zr1 <sub>a</sub> | Zr      | 0.422372 | 0.422372 | 0.500000  |
| Zr2 <sub>a</sub> | Zr      | 0.468309 | 0.531691 | 0.610953  |
| O1 <sub>a</sub>  | O       | 0.463860 | 0.463860 | 0.603326  |
| O2 <sub>a</sub>  | O       | 0.506627 | 0.565653 | 0.500000  |
| O3 <sub>a</sub>  | O       | 0.429834 | 0.570166 | 0.567662  |
| C3 <sub>a</sub>  | C       | 0.418676 | 0.581324 | 0.500000  |

|     |   |          |          |          |
|-----|---|----------|----------|----------|
| C3b | C | 0.391499 | 0.608501 | 0.500000 |
| O4a | O | 0.519326 | 0.480674 | 0.745654 |
| C4a | C | 0.500000 | 0.500000 | 0.784719 |
| C4b | C | 0.500000 | 0.500000 | 0.879866 |

### Pawley refinement of **1**

The Pawley refinement was performed using synchrotron X-ray powder diffraction data of **1**. The Pawley fits were carried out in  $P6$ ,  $P6/m$ , and  $P6/mmm$  space groups using a data range of  $0.5 - 10^\circ 2\theta$ , a 7 term Chebyshev polynomial, a  $1/x$  term (low angle scattering), a PVII peak profile, a simple axial model term, a zero-point correction, and cell parameter refinement. An  $R_{wp}$  of  $\sim 12.6$  was found for the Pawley fit, which is not significantly different than the Rietveld refined  $R_{wp}$  of 14.03 in  $P6/mmm$ , indicating the reasonableness of the Rietveld refined structure.

**Table S2.** Pawley refinement parameters for **1** in  $P6/mmm$  space group.

| Parameters                | Value     |
|---------------------------|-----------|
| $2\theta_{\min} (^\circ)$ | 0.5       |
| $2\theta_{\max} (^\circ)$ | 10.0      |
| $\lambda (^\circ)$        | 0.414536  |
| $a (\text{\AA})$          | 31.937(7) |
| $c (\text{\AA})$          | 15.798(4) |
| $R_{wp}$                  | 12.598    |
| <i>Goodness of Fit</i>    | 1.972     |

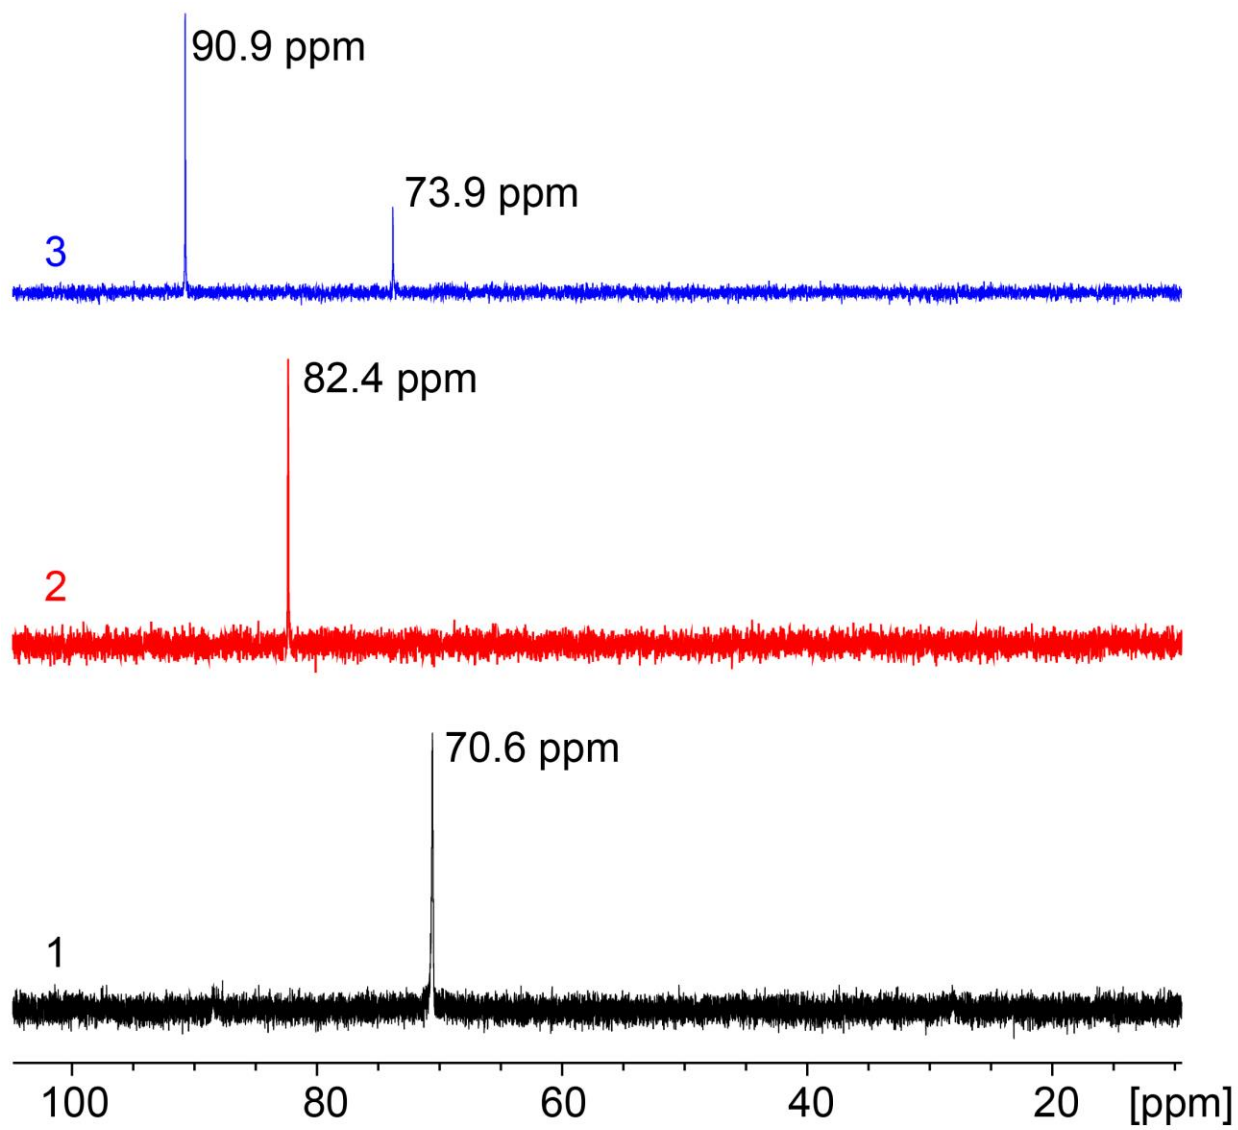

**Figure S22.** CsF- and acid-digested  $^{31}\text{P}$  { $^1\text{H}$ } NMR spectra of **1**, **2** and **3**. **1** was digested with CsF/DMSO- $\text{d}_6$ /D $_2\text{O}$  while **2** and **3** were digested with  $\text{CF}_3\text{CO}_2\text{H}$ /DMSO- $\text{d}_6$ .

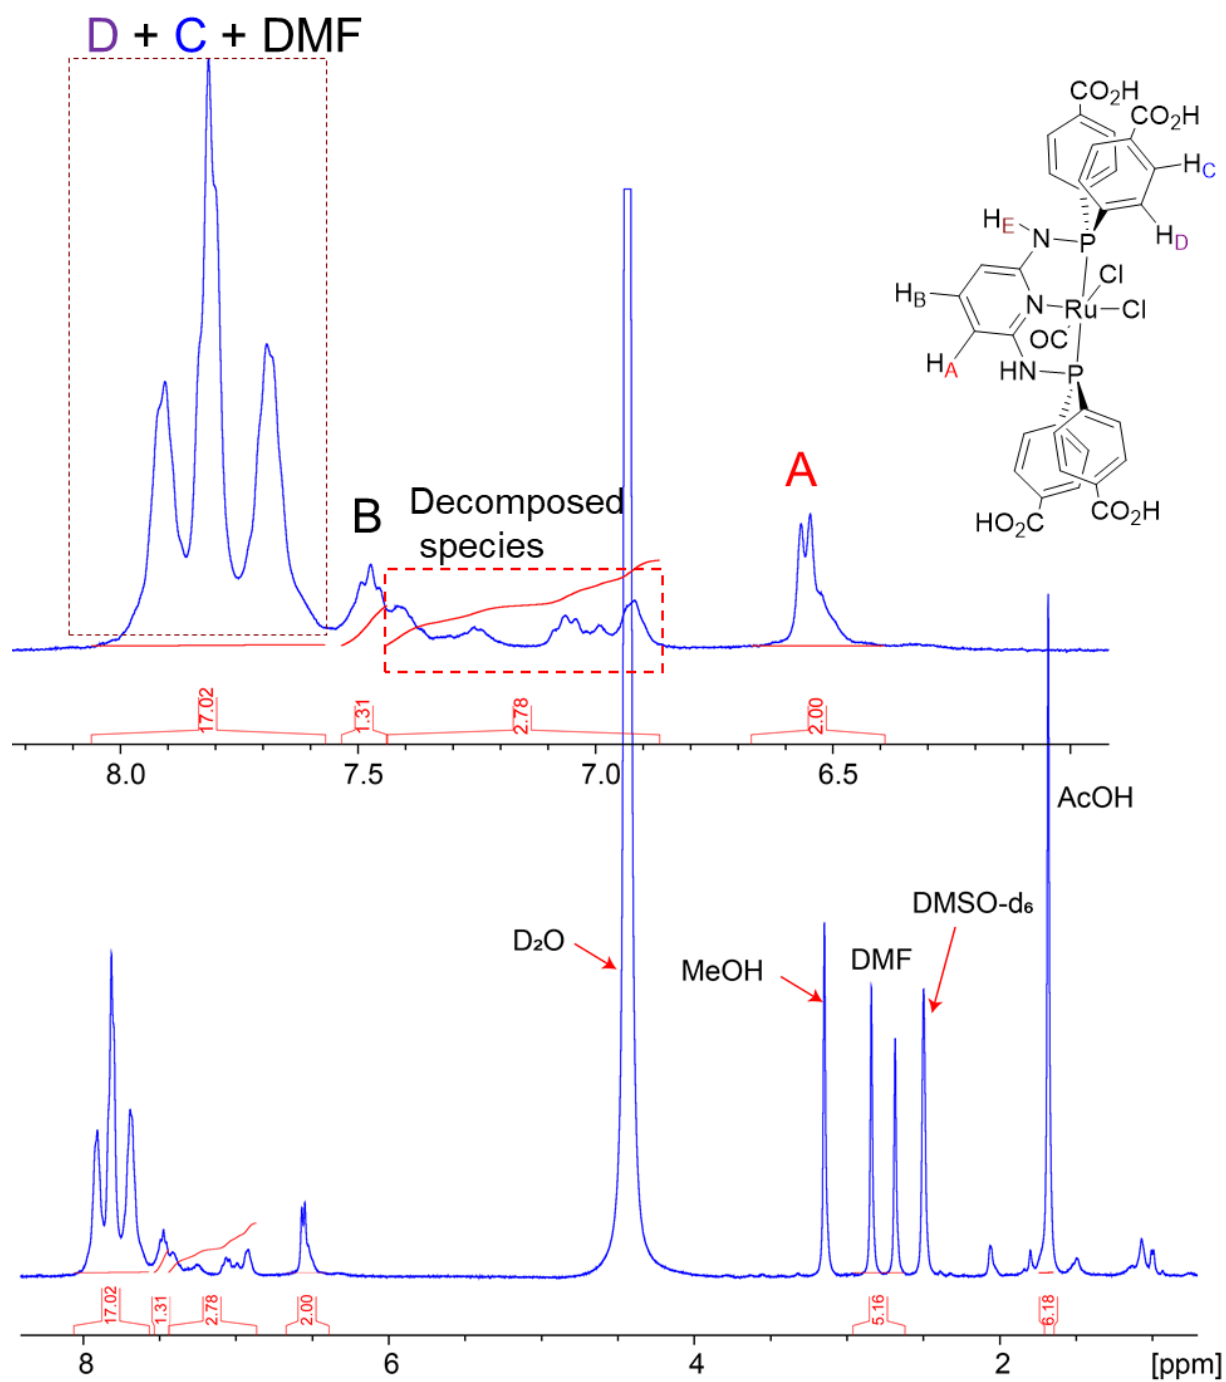

**Figure S23.** CsF-digested  $^1\text{H}$  NMR spectrum ( $\text{DMSO-d}_6/\text{D}_2\text{O}$ ) of **1** after MeOH solvent exchange.

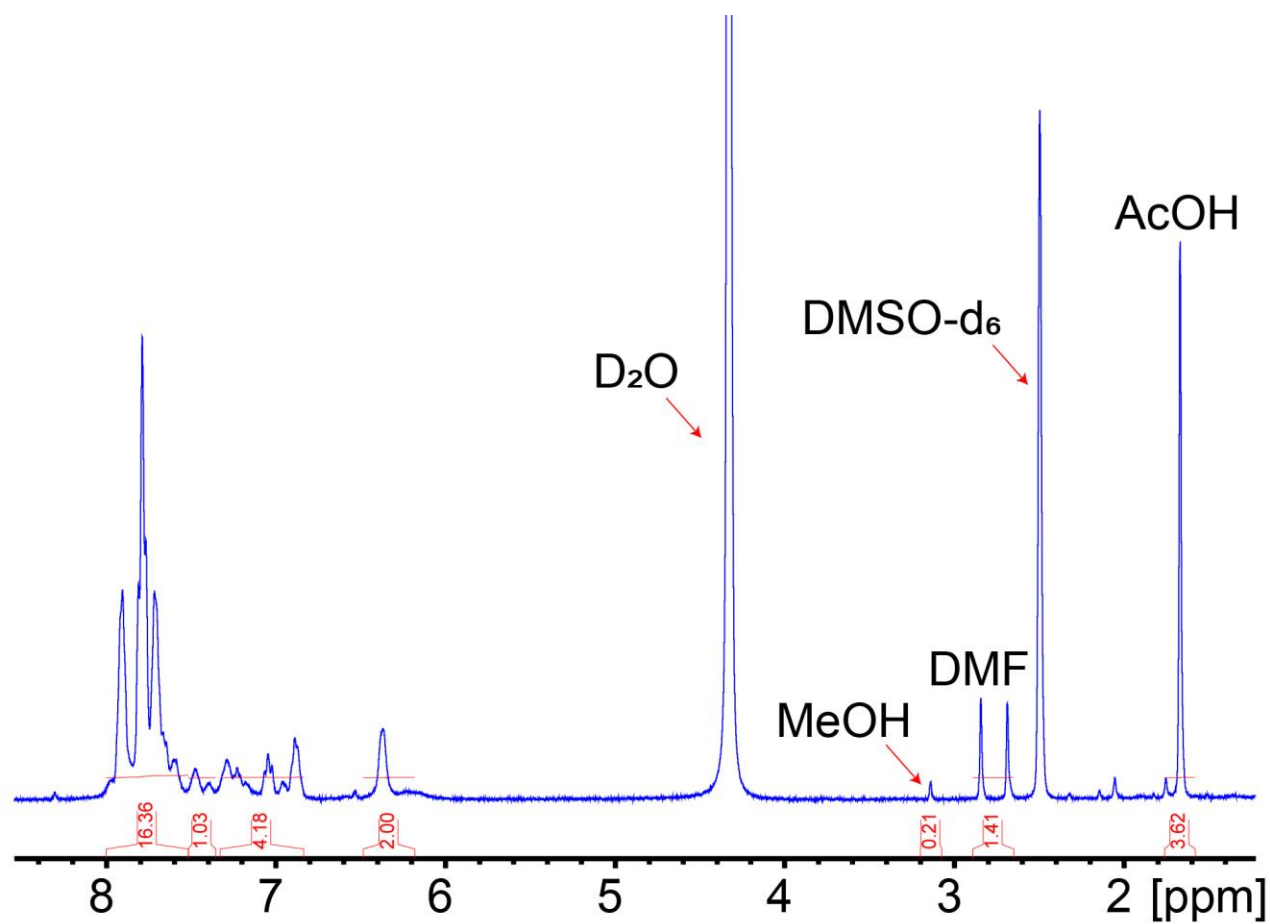

**Figure S24.** CsF-digested  $^1\text{H}$  NMR spectrum ( $\text{DMSO-d}_6/\text{D}_2\text{O}$ ) of **1** after activation.

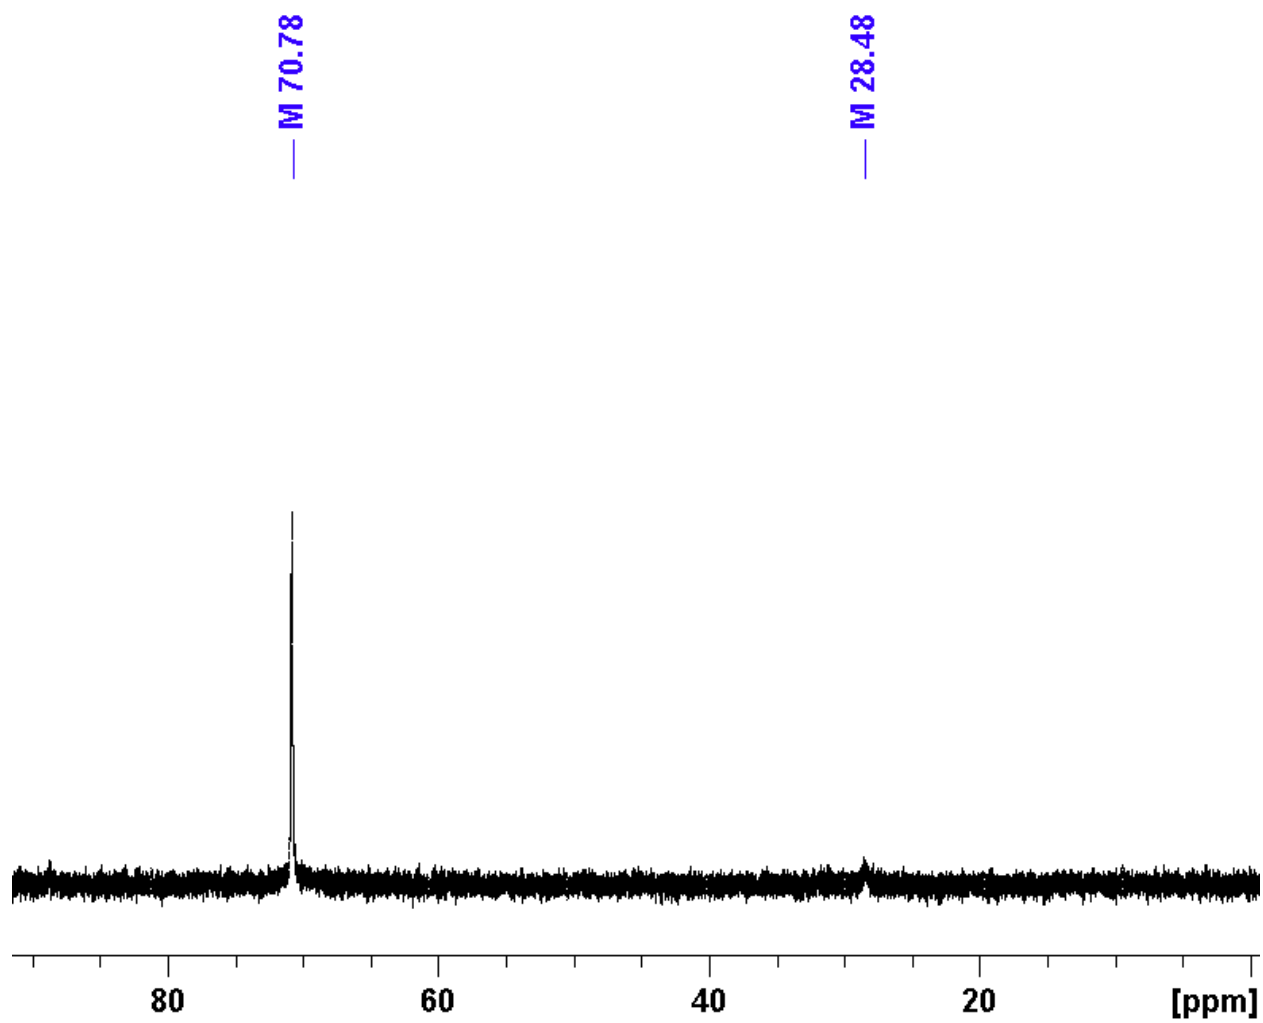

**Figure S25.** CsF-digested  $^{31}\text{P}\{^1\text{H}\}$  NMR spectrum (DMSO- $\text{d}_6/\text{D}_2\text{O}$ ) of **1** after activation.

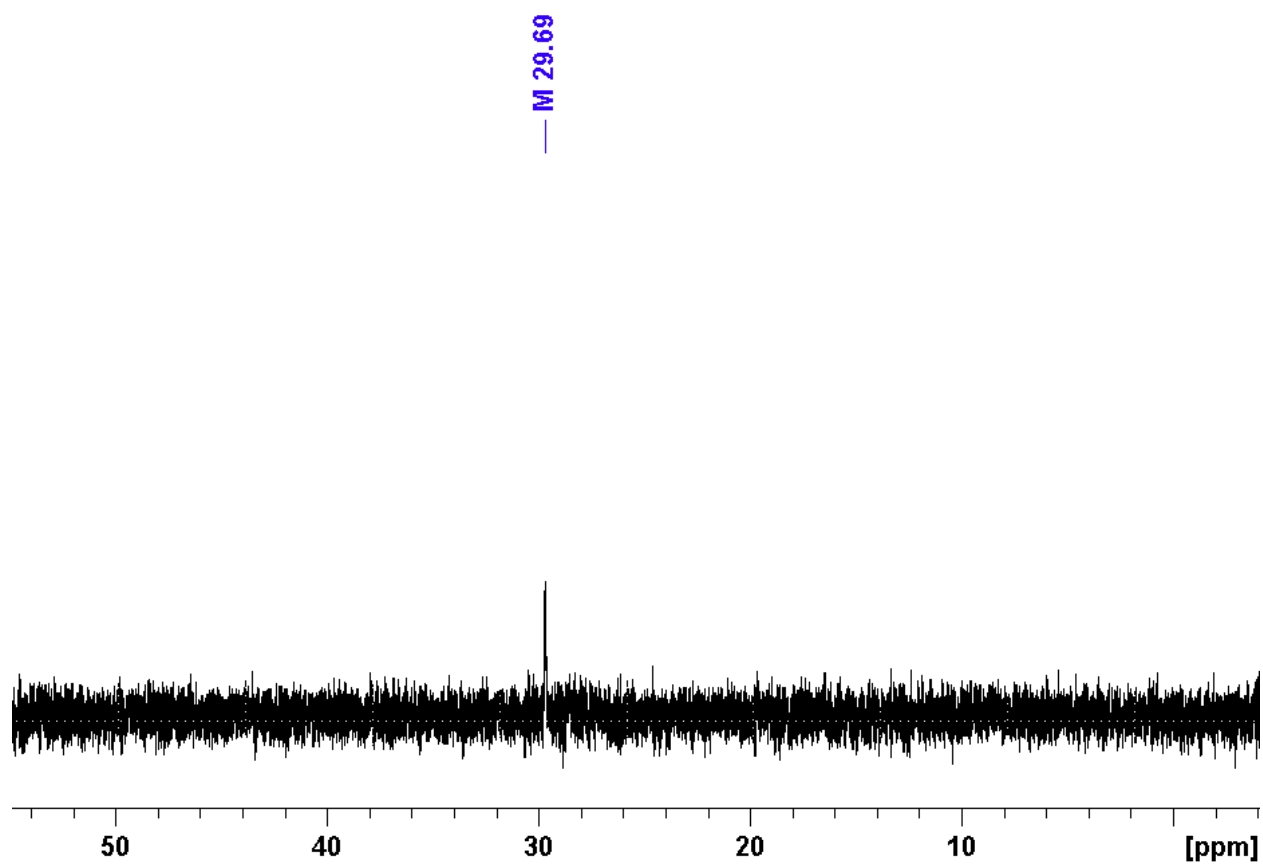

**Figure S26.**  $^{31}\text{P}\{^1\text{H}\}$  NMR spectrum for MOF reaction supernatant of **1**.

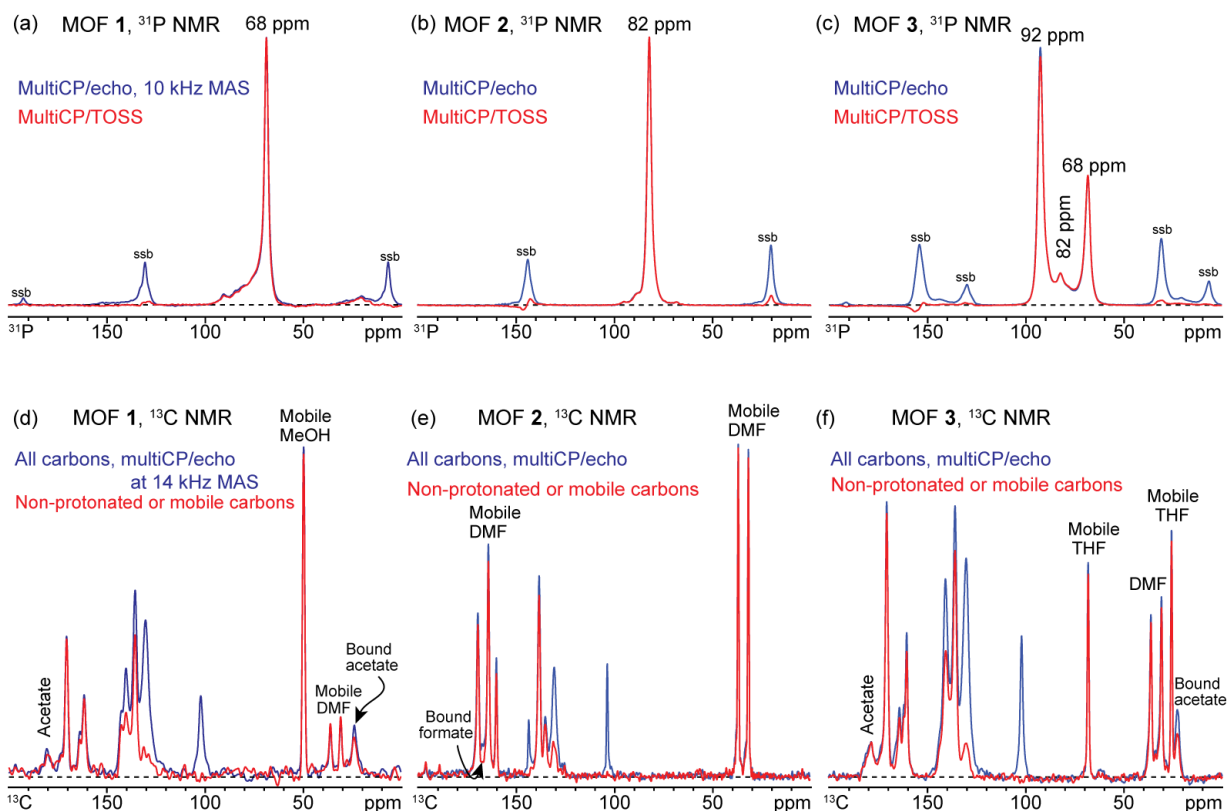

**Figure S27.** Solid-state NMR spectra of (a, d) 1, (b, e) 2 and (c, f) 3. (a-c):  $^{31}\text{P}$  NMR spectra recorded at 10 kHz MAS without (top blue line) and with (bottom red line) total suppression of spinning sidebands. “ssb”: spinning sideband. (d-f) Quantitative multiCP  $^{13}\text{C}$  NMR spectra without (top blue line) and with (bottom red line) recoupled  $^1\text{H}$  dipolar dephasing, recorded at 14 kHz MAS. The spectrum in red shows nonprotonated carbons and highly mobile segments. Bound acetate and formate are identified by the signal reduction of their  $\text{CH}_n$  groups after dipolar dephasing, and by inhomogeneous line broadening. For rotating  $\text{CH}_3$  groups in immobilized molecules, dephasing to 57% of the full signal is expected.



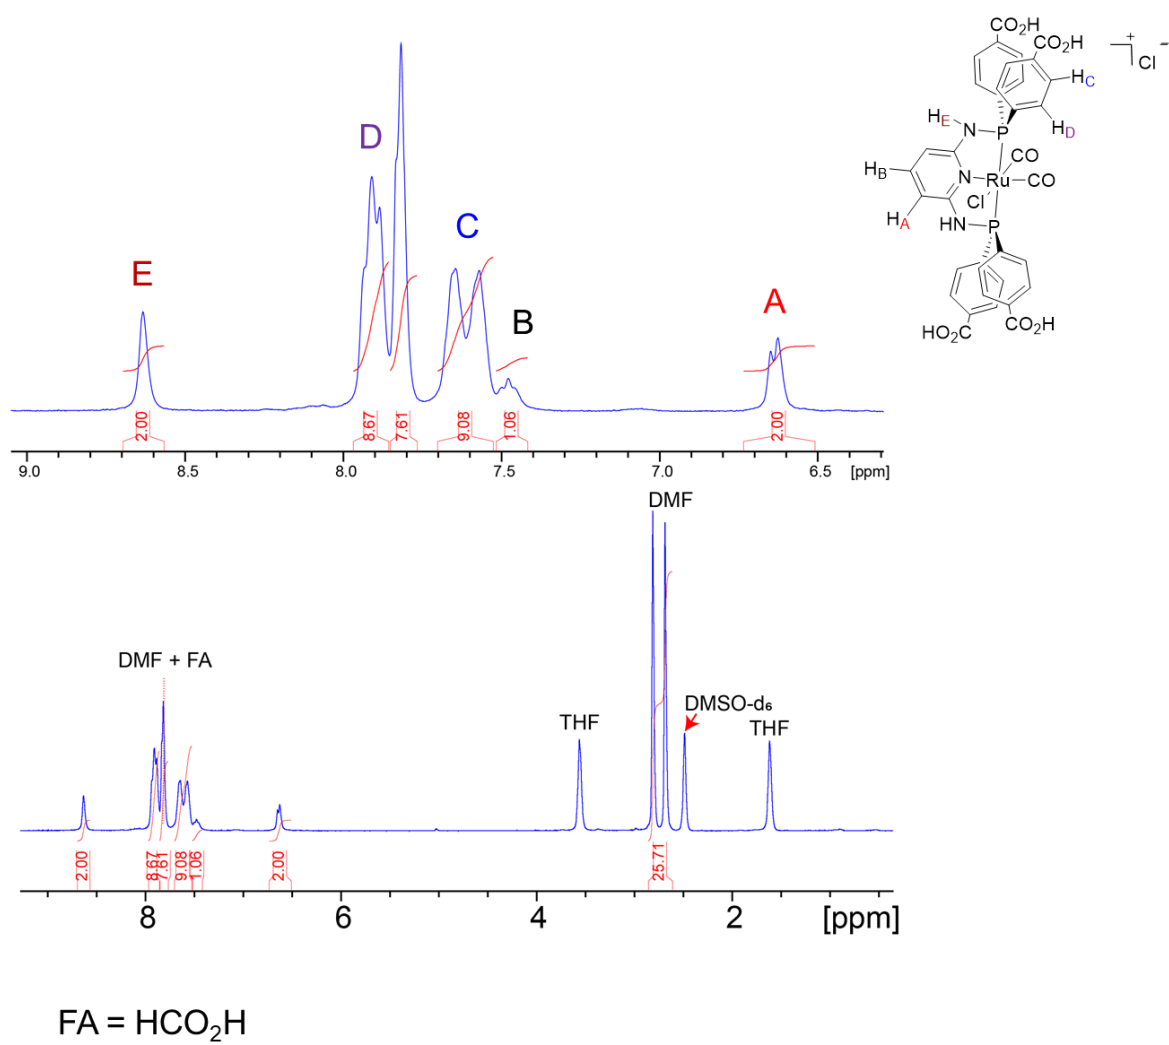

**Figure S28.** Acid-digested  $^1\text{H}$  NMR spectrum ( $\text{CF}_3\text{CO}_2\text{H}/\text{DMSO-d}_6$ ) of **2** after THF washing.

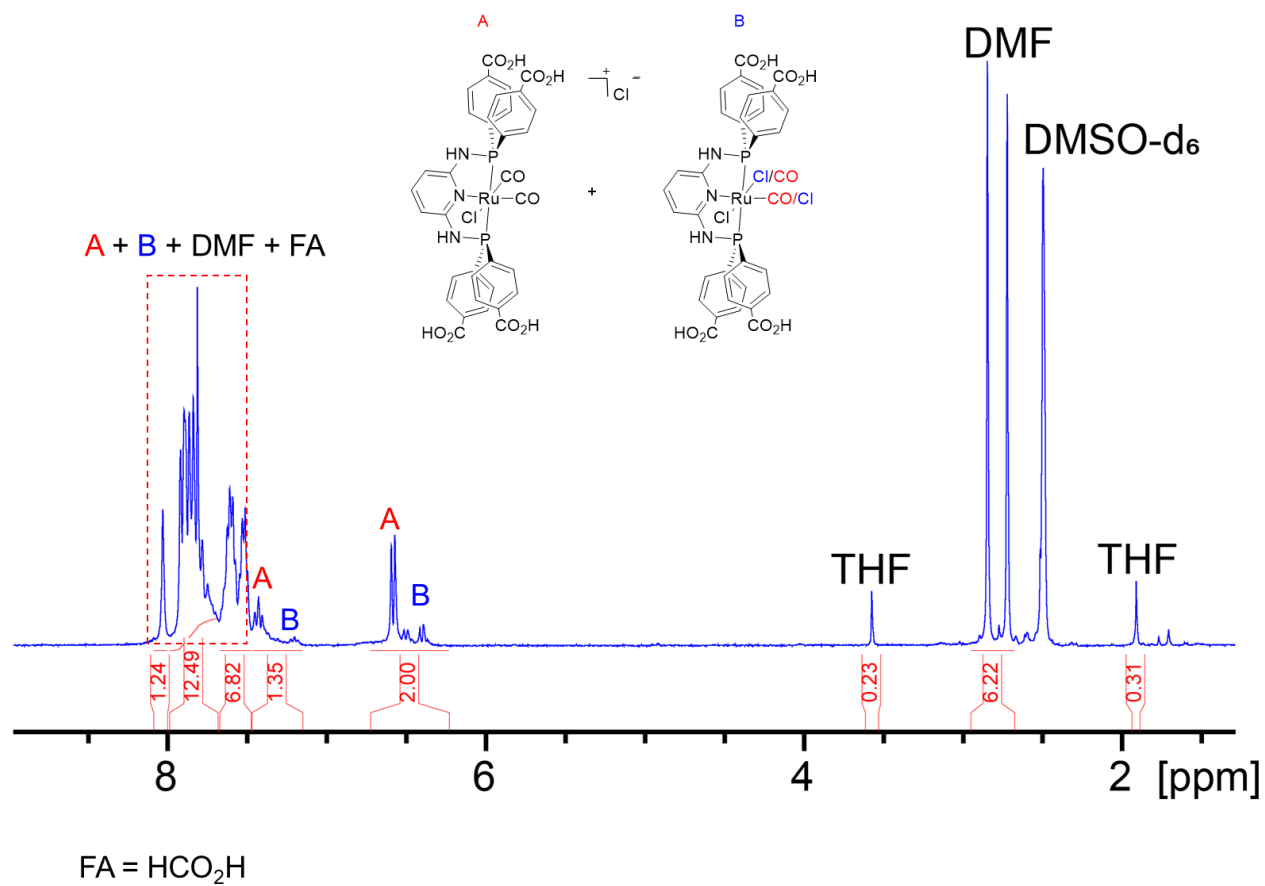

**Figure S29.** Acid-digested  $^1\text{H}$  NMR spectrum ( $\text{CF}_3\text{CO}_2\text{H}/\text{DMSO-}\text{d}_6$ ) of **2** after activation.

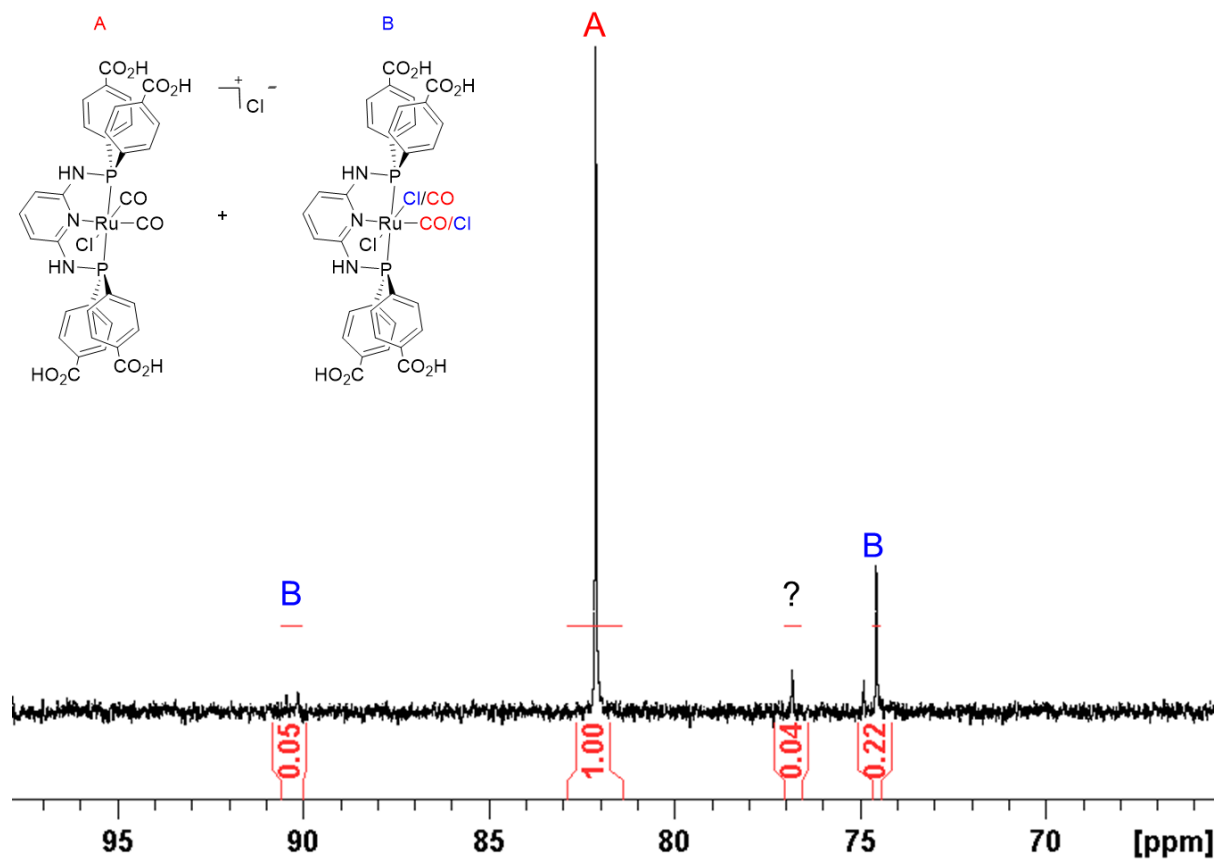

**Figure S30.** Acid-digested  $^{31}\text{P}\{^1\text{H}\}$  NMR spectrum (CF<sub>3</sub>CO<sub>2</sub>H/DMSO-d<sub>6</sub>) of **2** after activation.

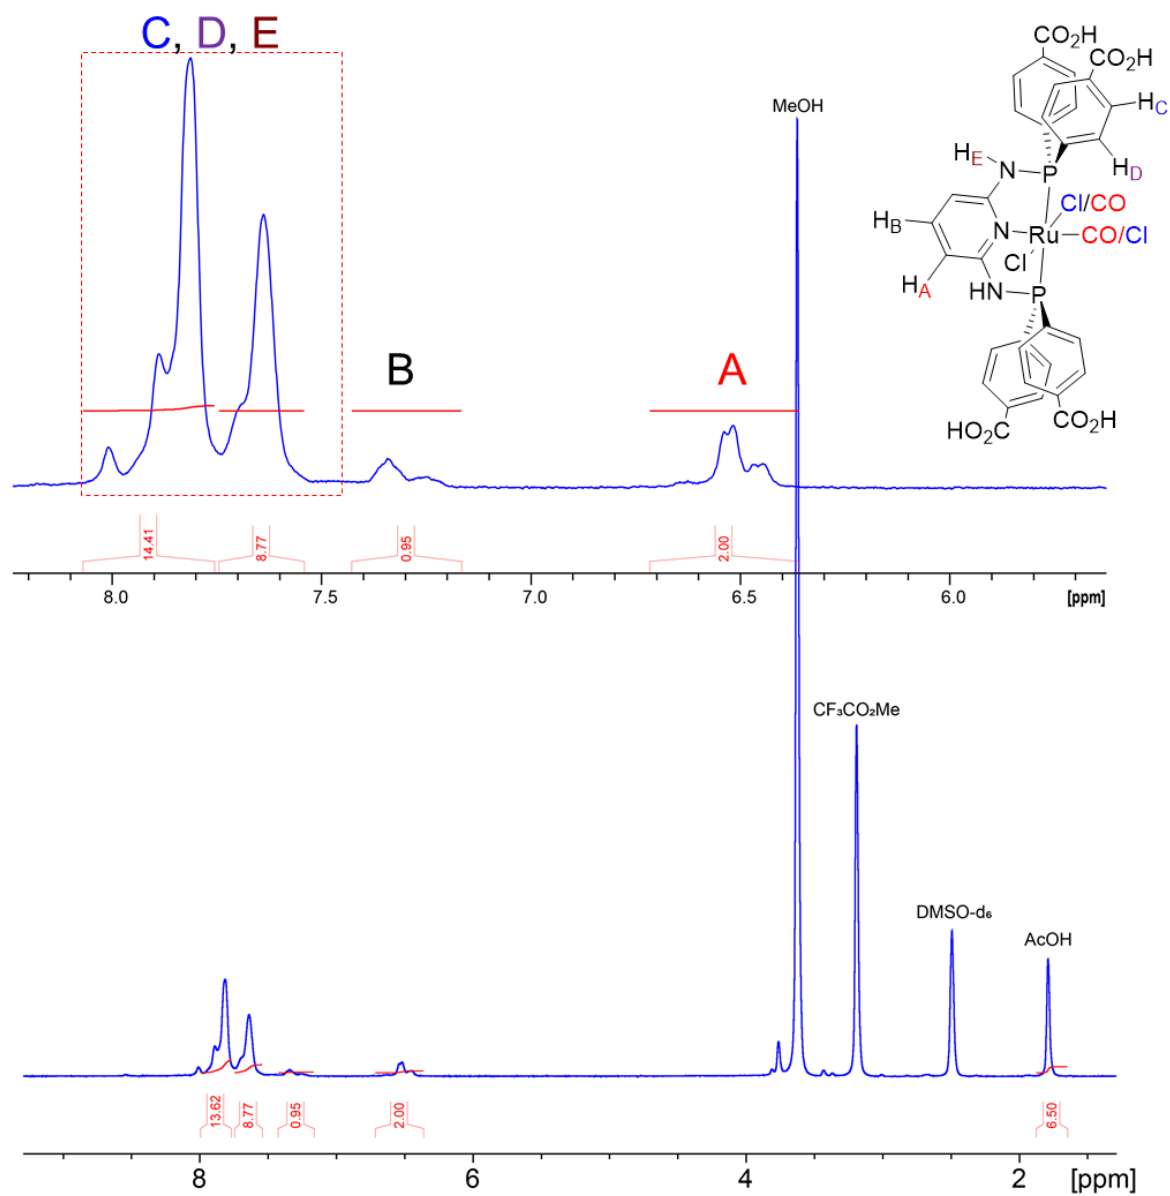

**Figure S31.** Acid-digested  $^1H$  NMR spectrum ( $CF_3CO_2H/DMSO-d_6$ ) of **3** after MeOH solvent exchange.

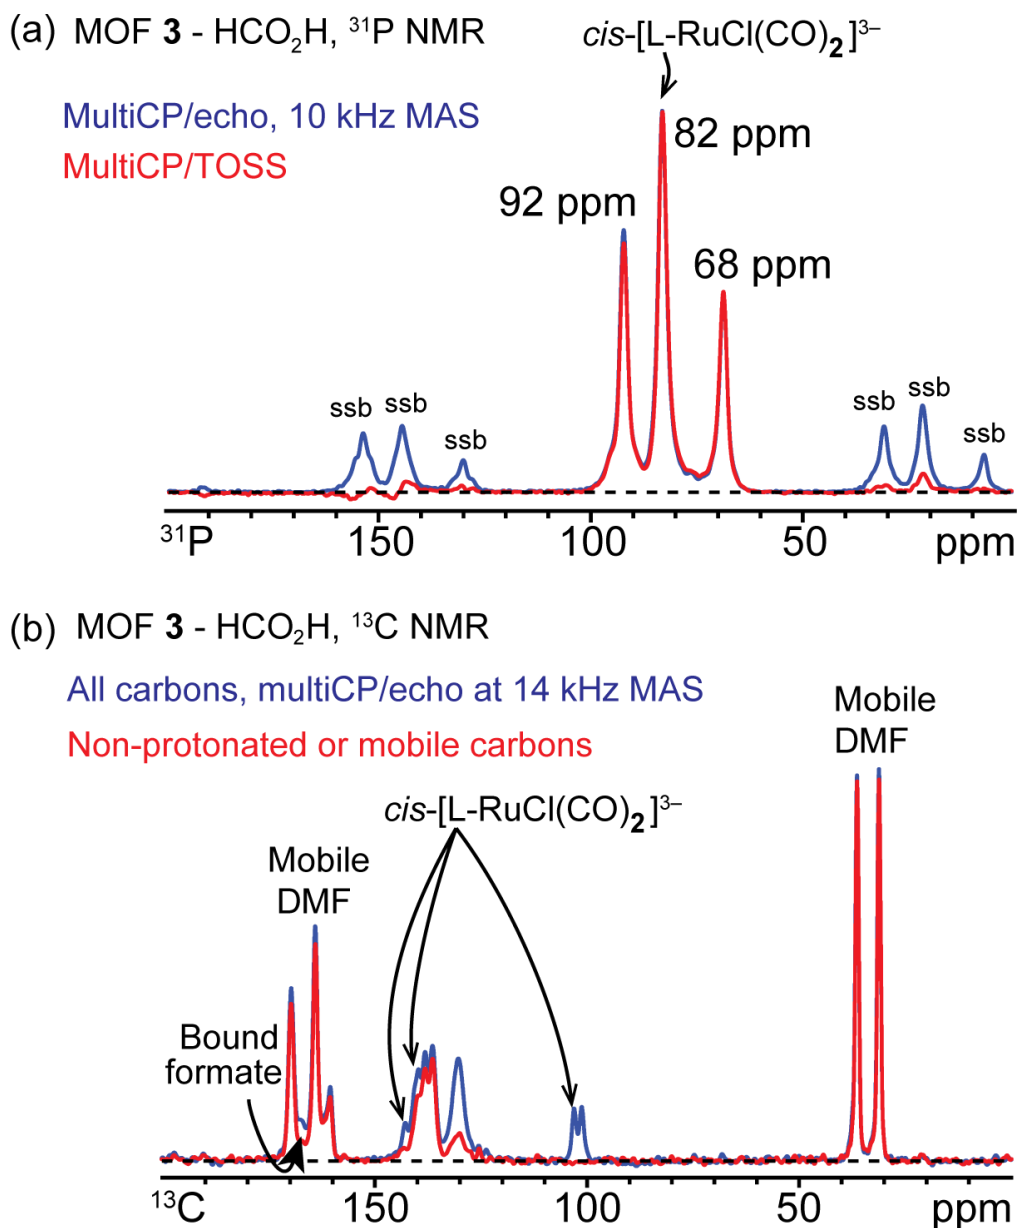

**Figure S32.** Solid-state <sup>31</sup>P and <sup>13</sup>C NMR spectra of MOF **3** synthesized with HCO<sub>2</sub>H as the modulator. (a): <sup>31</sup>P NMR spectra recorded at 10 kHz MAS without (top blue line) and with (bottom red line) total suppression of spinning sidebands. “ssb”: spinning sideband. (b) Quantitative multiCP <sup>13</sup>C NMR spectra without (top blue line) and with (bottom red line) recoupled <sup>1</sup>H dipolar dephasing, recorded at 14 kHz MAS. Bound formate is identified by the signal reduction after dipolar dephasing.

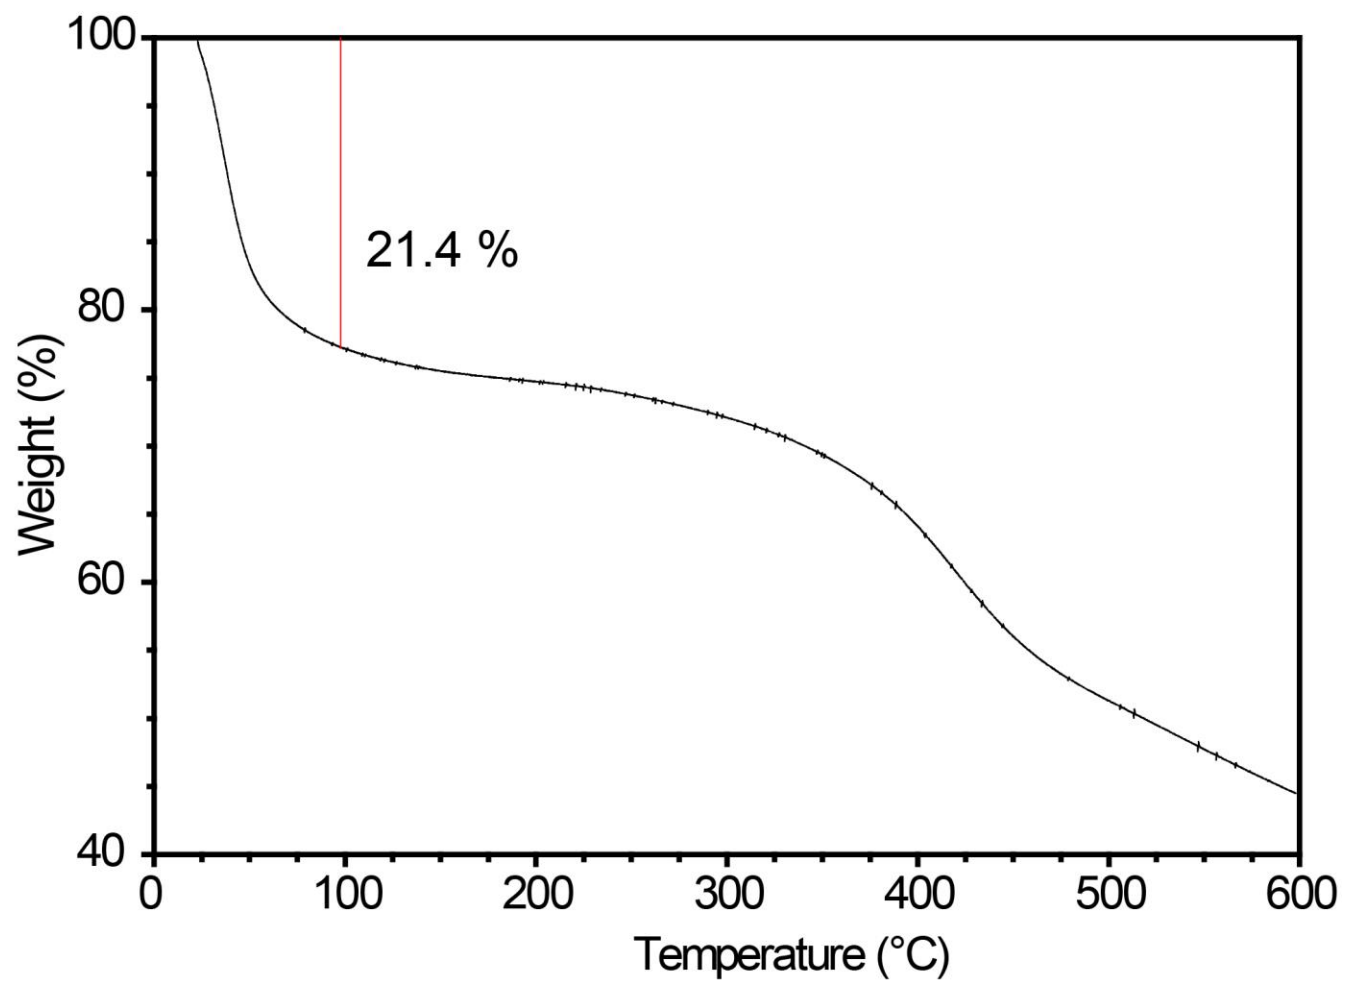

**Figure S33.** TGA for MeOH soaked sample of **1** measured at a ramp rate of 5 °C/min under flowing N<sub>2</sub> (50 mL/min).

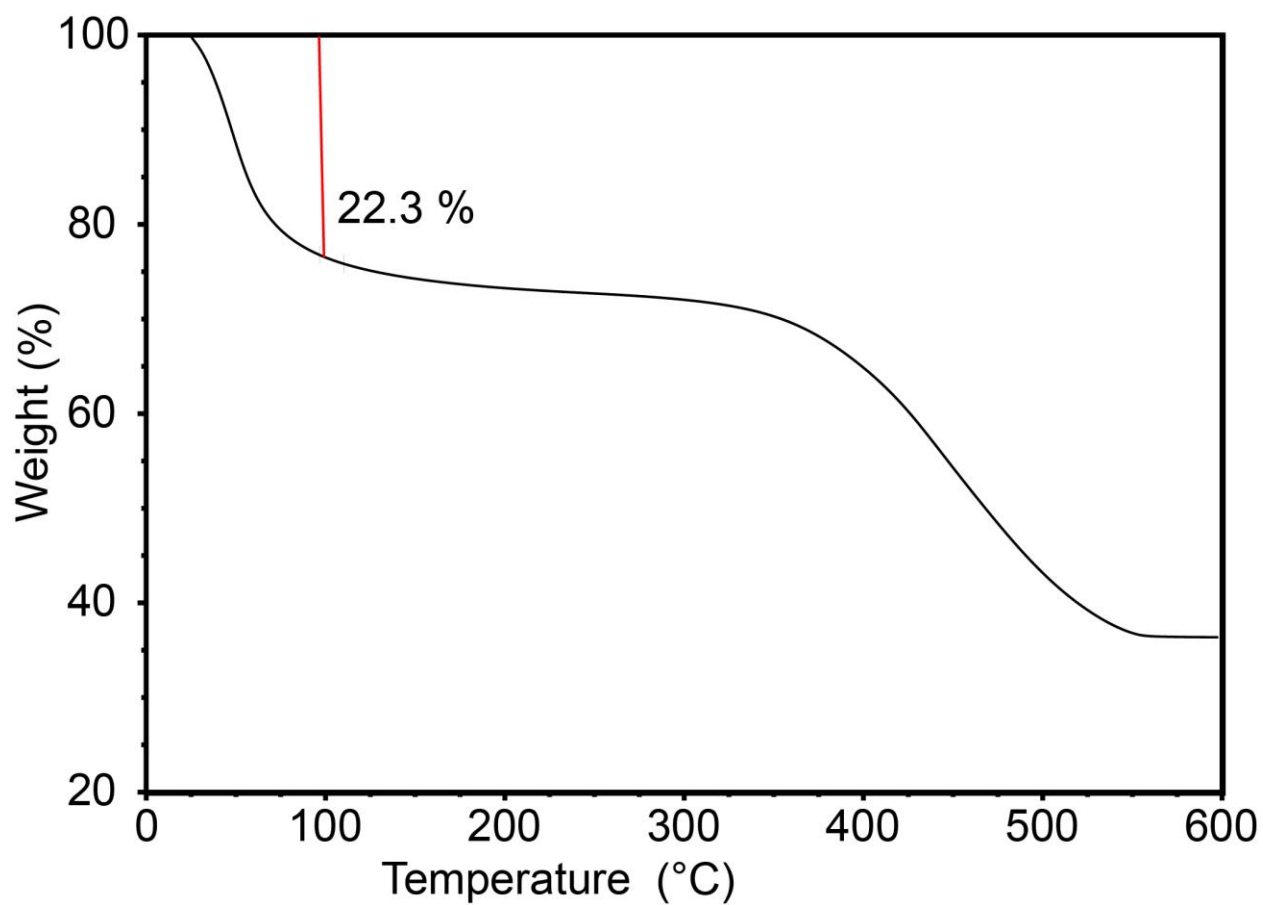

**Figure S34.** TGA for MeOH soaked sample of **3** measured at a ramp rate of 5 °C/min under flowing N<sub>2</sub> (50 mL/min).

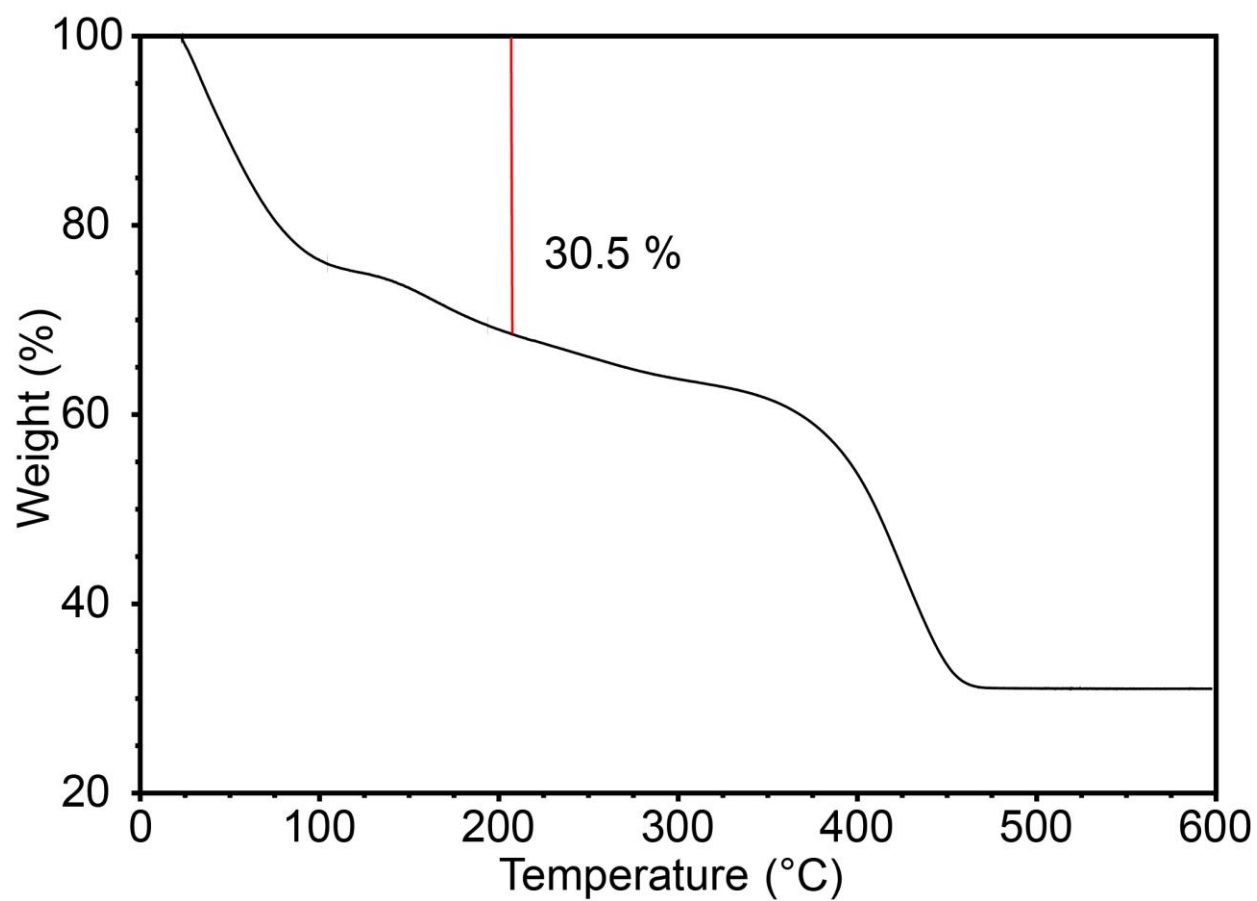

**Figure S35.** TGA for THF-exchanged sample of **2** measured at ramp rate of 5 °C/min under flowing N<sub>2</sub> (50 mL/min). <sup>1</sup>H NMR analysis of THF-exchanged MOF prior to TGA showed the presence of both THF and DMF solvents. As a result, 30.5 % mass loss up to 200 °C is attributed to volatilization of these solvents.



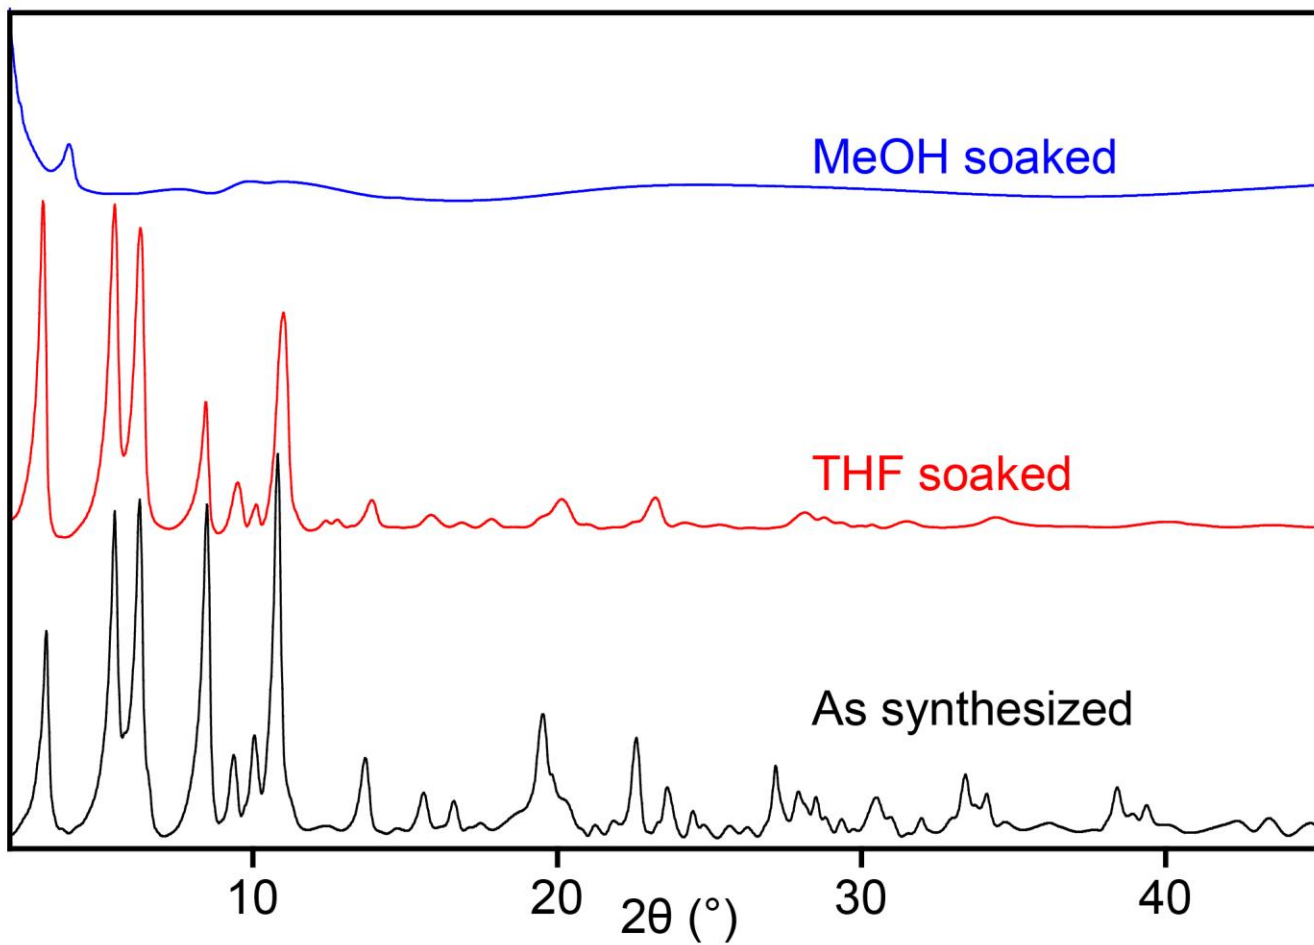

**Figure S36.** XRPD patterns (Cu-K $\alpha$  radiation,  $\lambda = 1.5418 \text{ \AA}$ ) for as synthesized, THF and MeOH solvent exchanged samples of **2**.

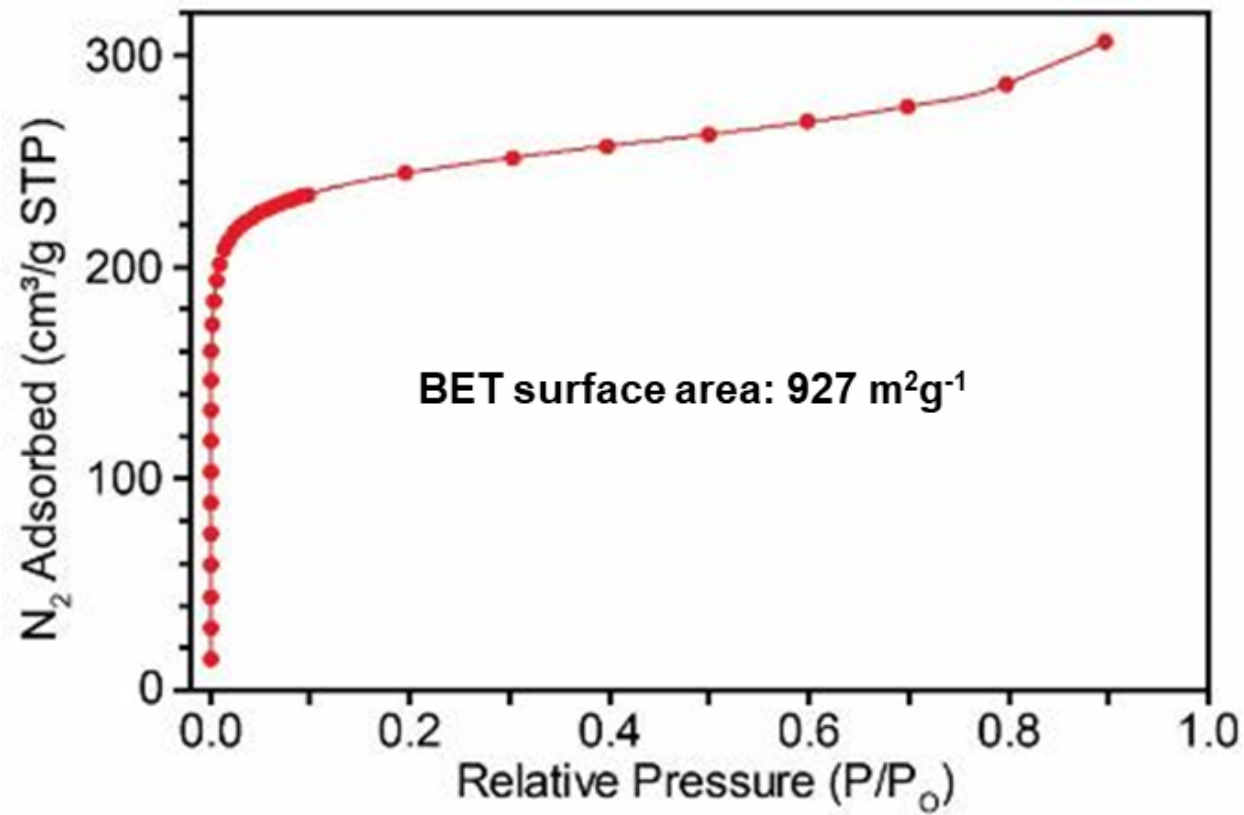

**Figure S37.**  $N_2$  adsorption isotherm (77 K) for MeOH soaked sample of **1** after desolvation at 100 °C and  $10^{-4}$  torr for 16 h.

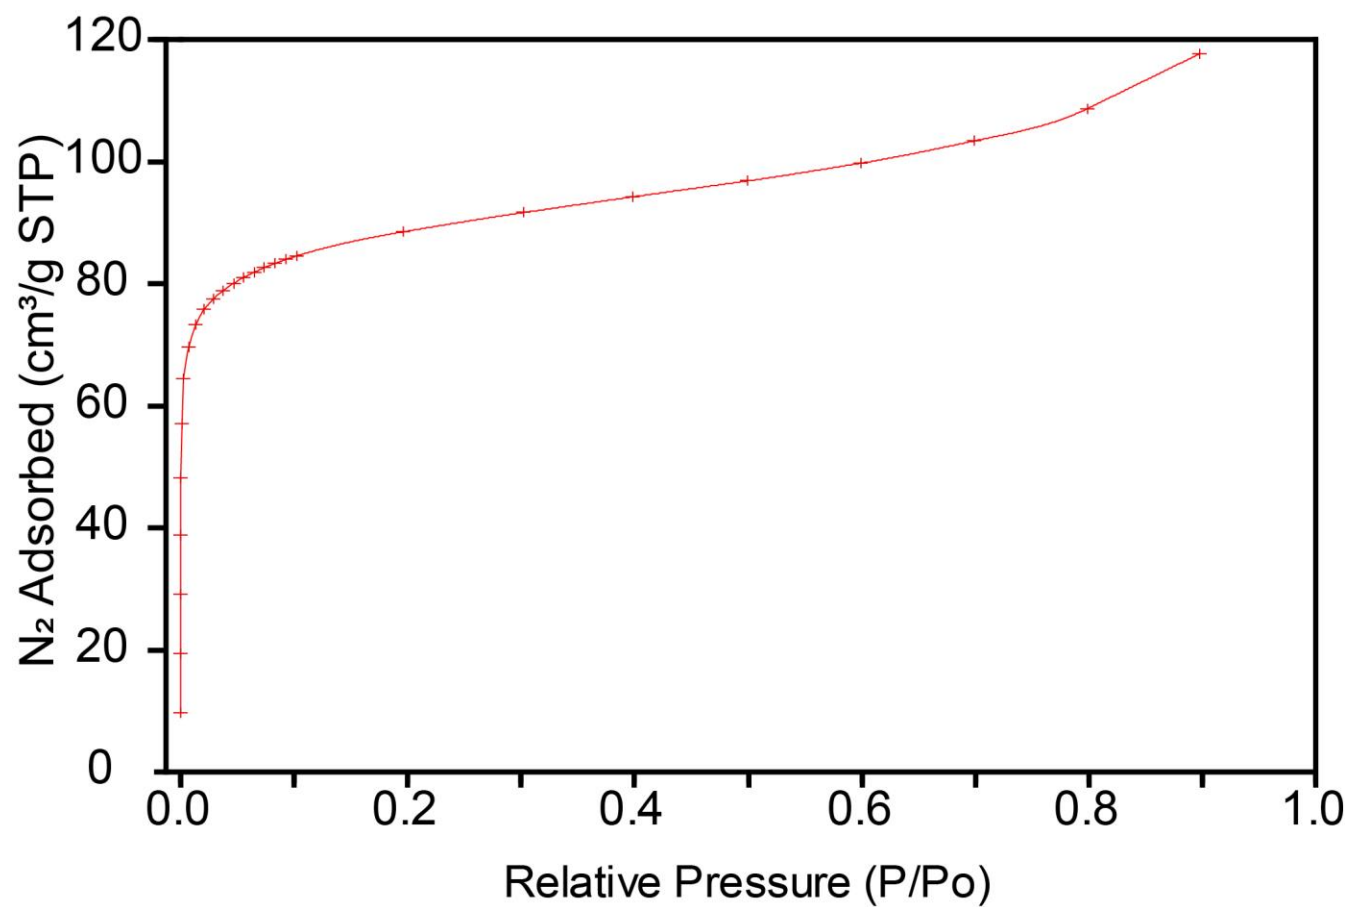

**Figure S38.** N<sub>2</sub> adsorption isotherm (77 K) for THF soaked sample of **2** after desolvation at 100 °C and 10<sup>-4</sup> torr for 16 h.

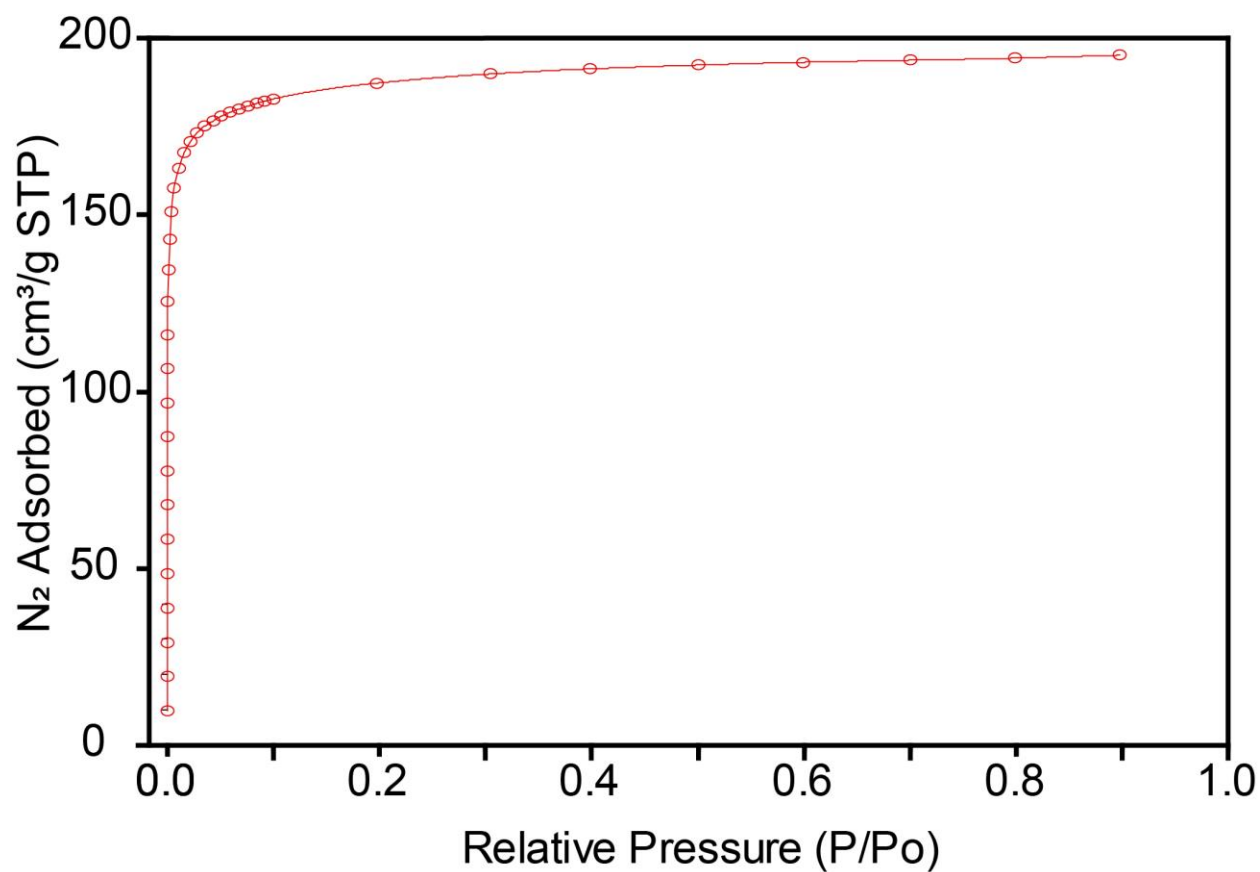

**Figure S39.** N<sub>2</sub> adsorption isotherm (77 K) for MeOH soaked sample of **3** after desolvation at 100 °C and 10<sup>-4</sup> torr for 16 h.

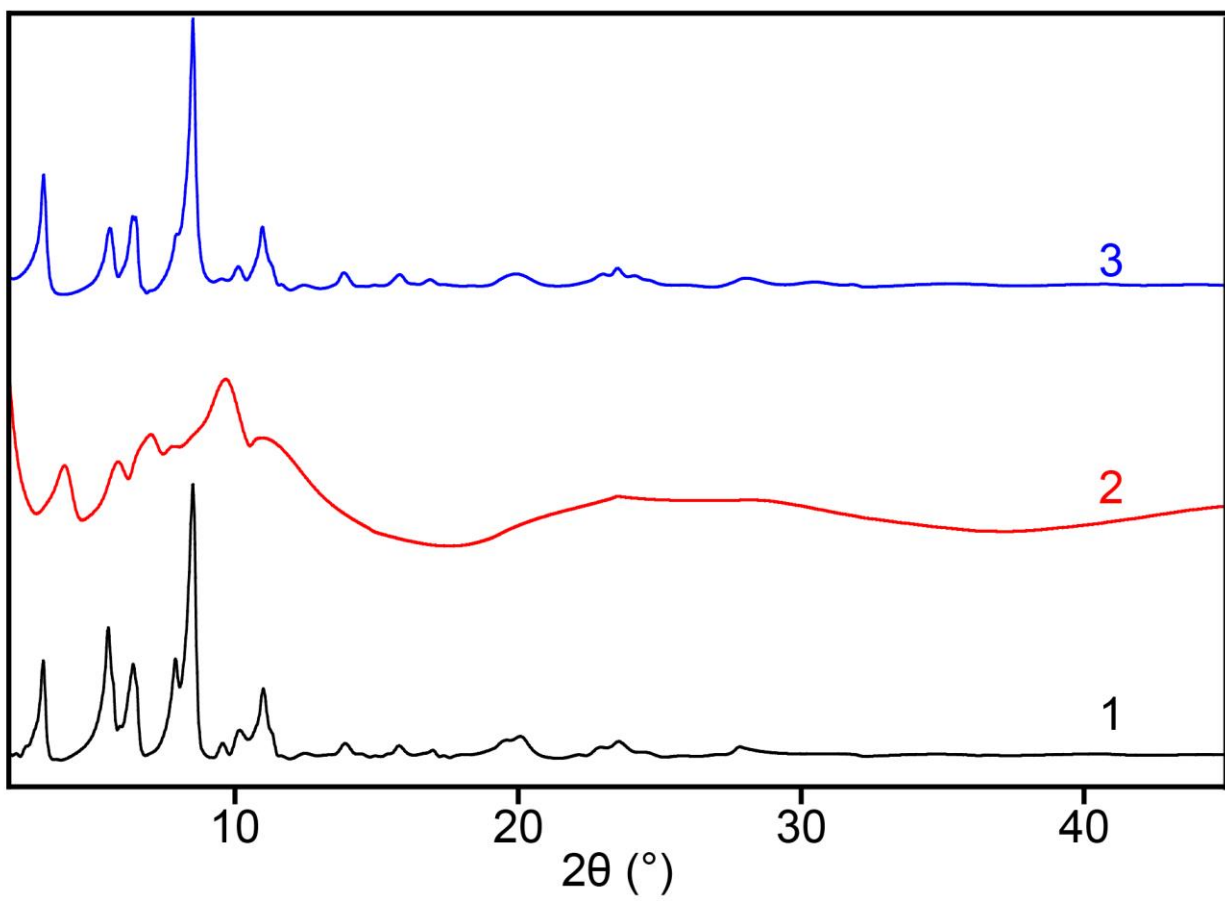

**Figure S40.** XRPD patterns (Cu-K $\alpha$  radiation,  $\lambda = 1.5418 \text{ \AA}$ ) for activated samples of **1**, **2** and **3**.

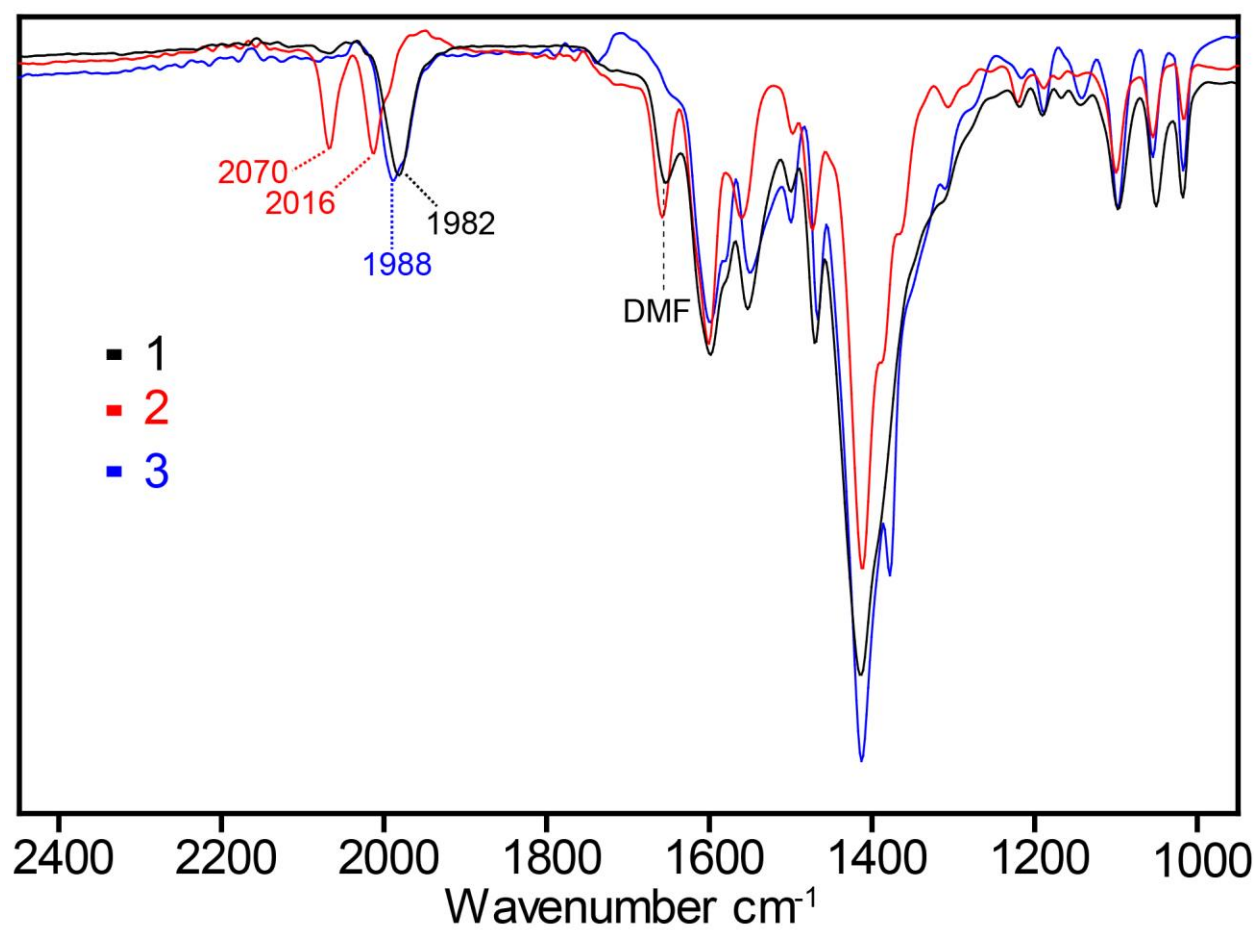

**Figure S41.** ATR-IR spectra for samples of **1**, **3** (MeOH soaked), and **2** (THF soaked).

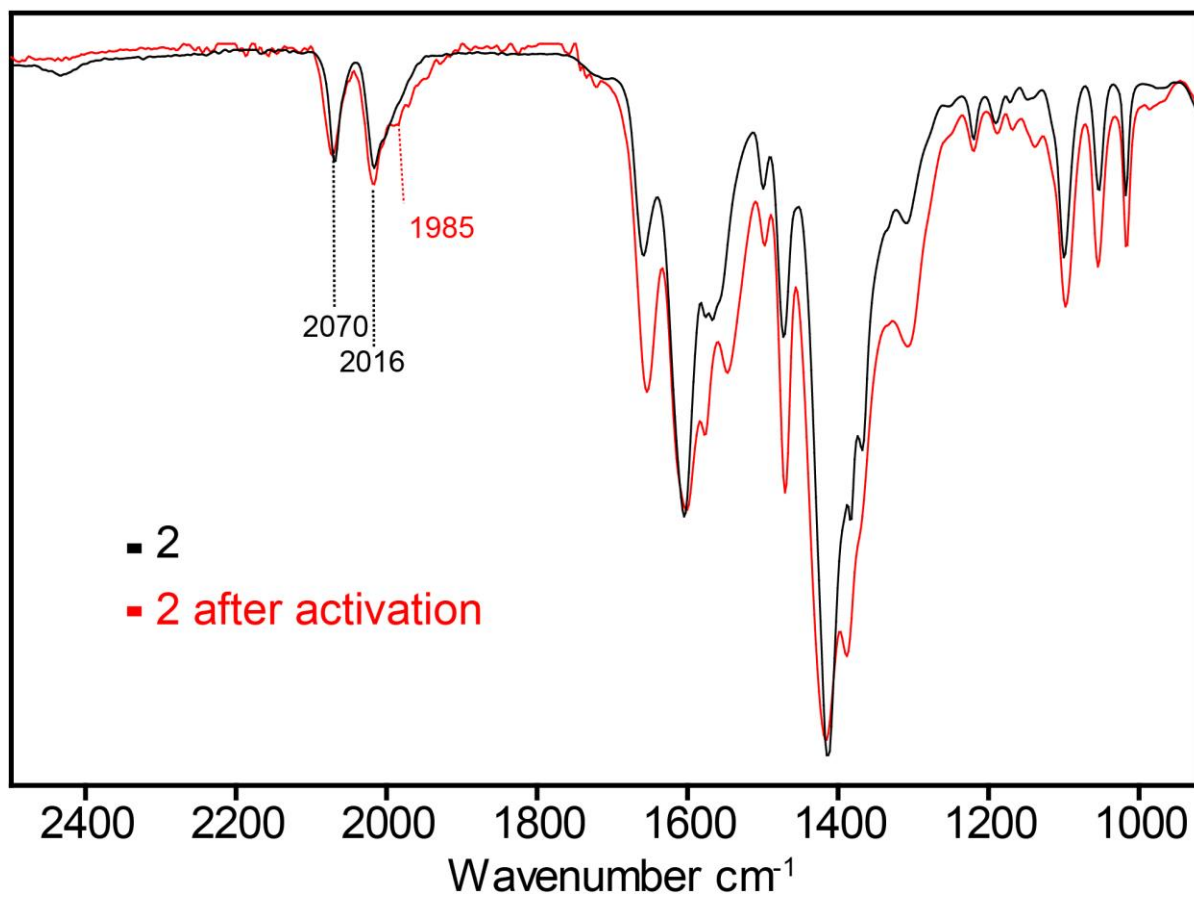

**Figure S42.** ATR-IR spectra for **2** before and after activation.

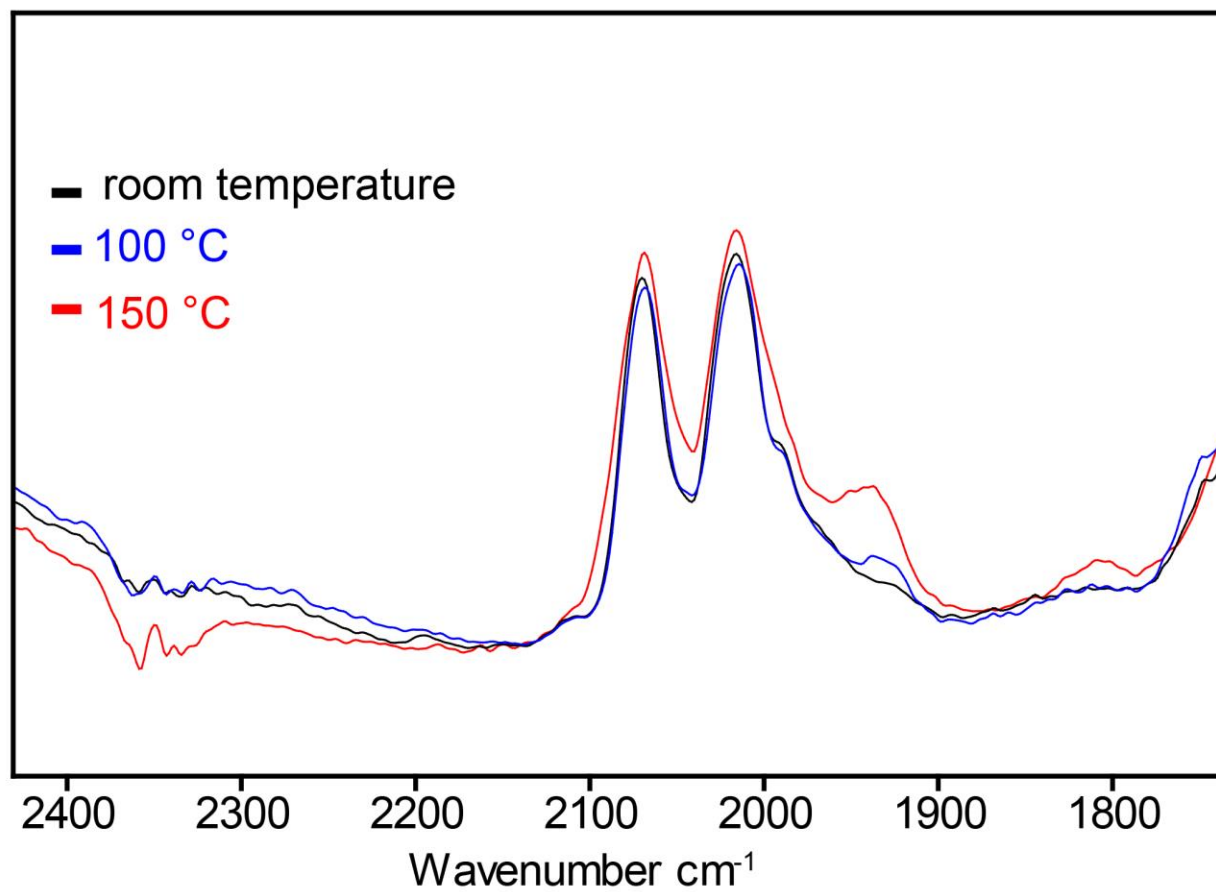

**Figure S43.** Diffuse reflectance IR spectra of **2** at room temperature and have heating to 100 and 150 °C under an N<sub>2</sub> atmosphere.



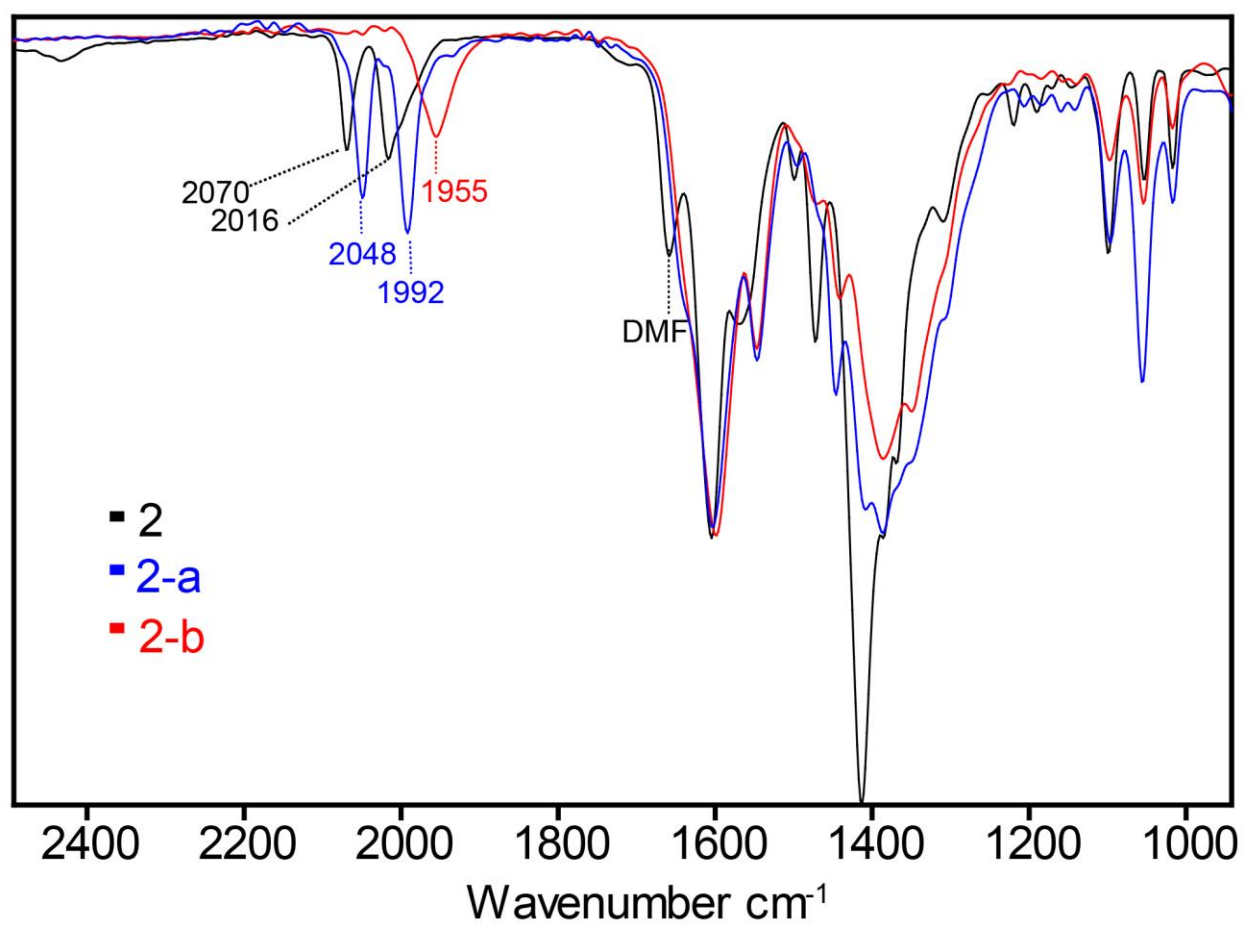

**Figure S44.** ATR-IR spectra of **2**, **2-a**, and **2-b**.

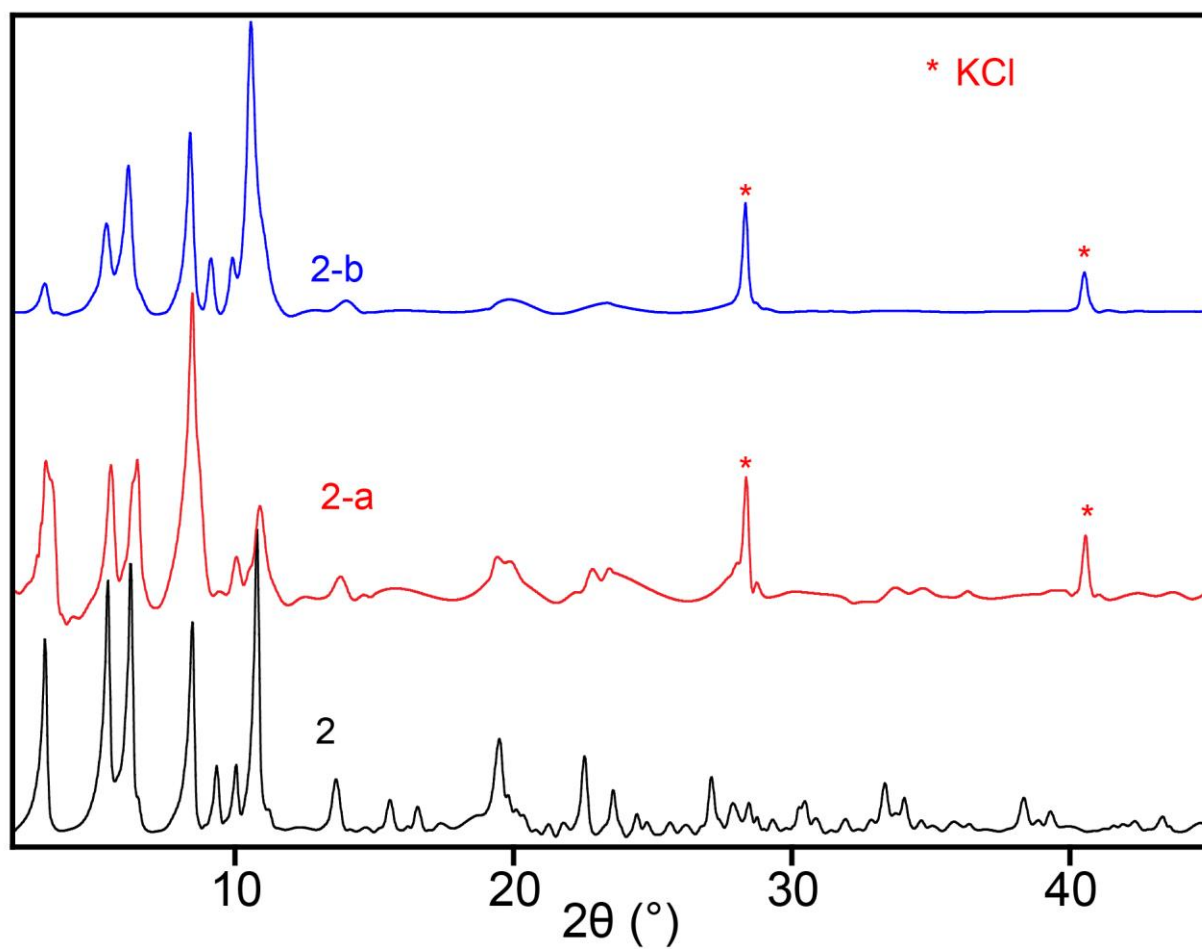

**Figure S45.** XRPD patterns (Cu-K $\alpha$  radiation,  $\lambda = 1.5418 \text{ \AA}$ ) of **2**, **2-a** and **2-b**.

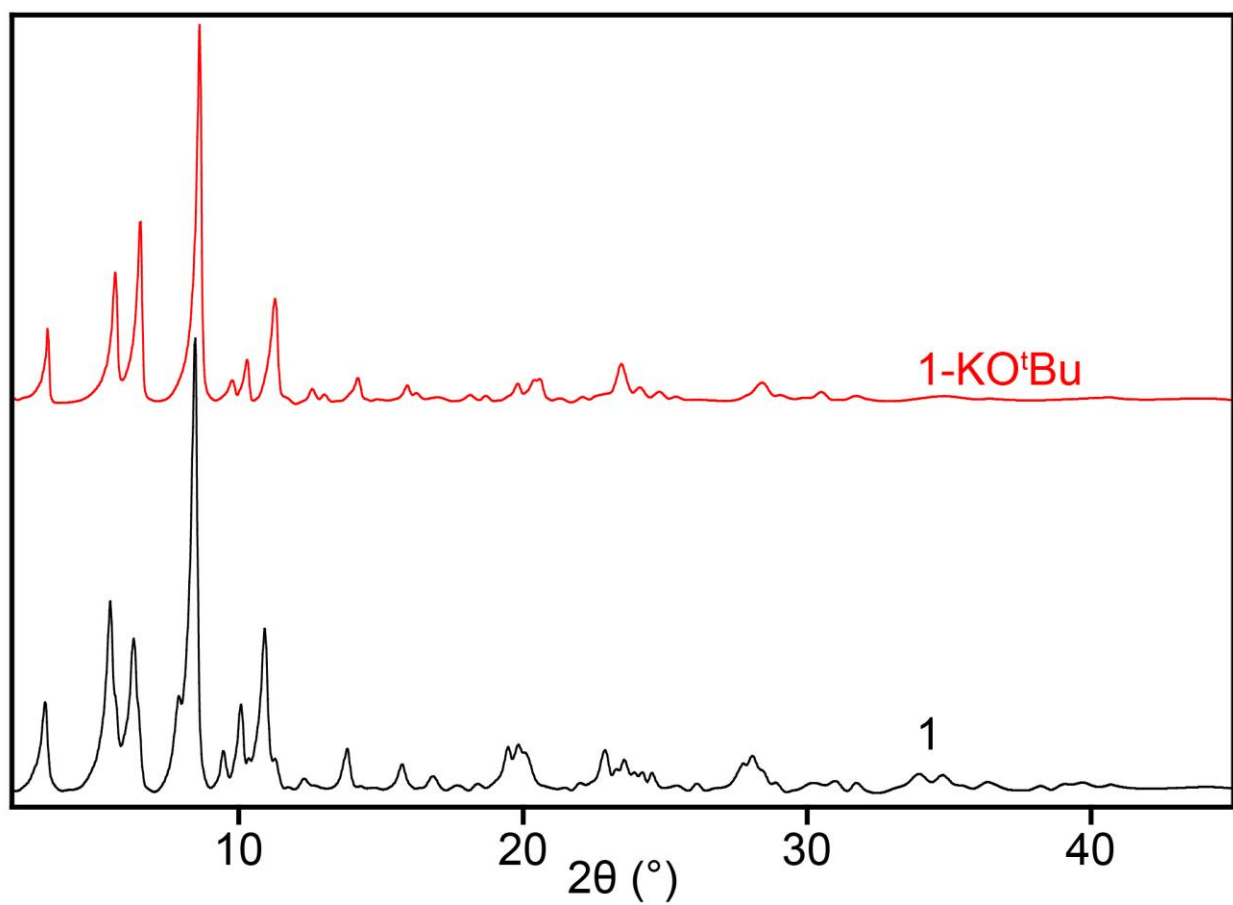

**Figure S46.** XRPD patterns (Cu-K $\alpha$  radiation,  $\lambda = 1.5418 \text{ \AA}$ ) of **1** and **1-KO<sup>t</sup>Bu**.

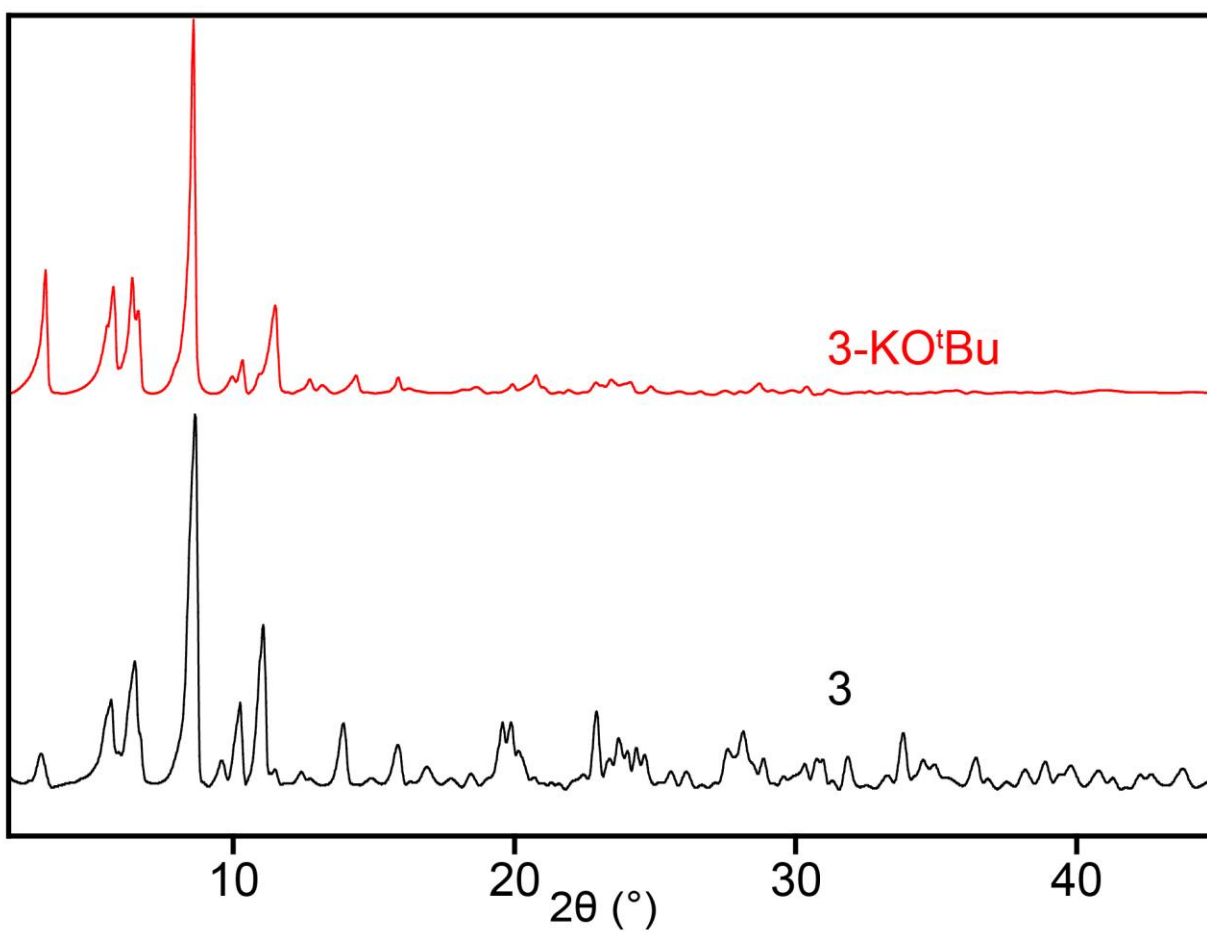

**Figure S47.** XRPD patterns (Cu-K $\alpha$  radiation,  $\lambda = 1.5418 \text{ \AA}$ ) of **3** and **3-KO<sup>t</sup>Bu**.

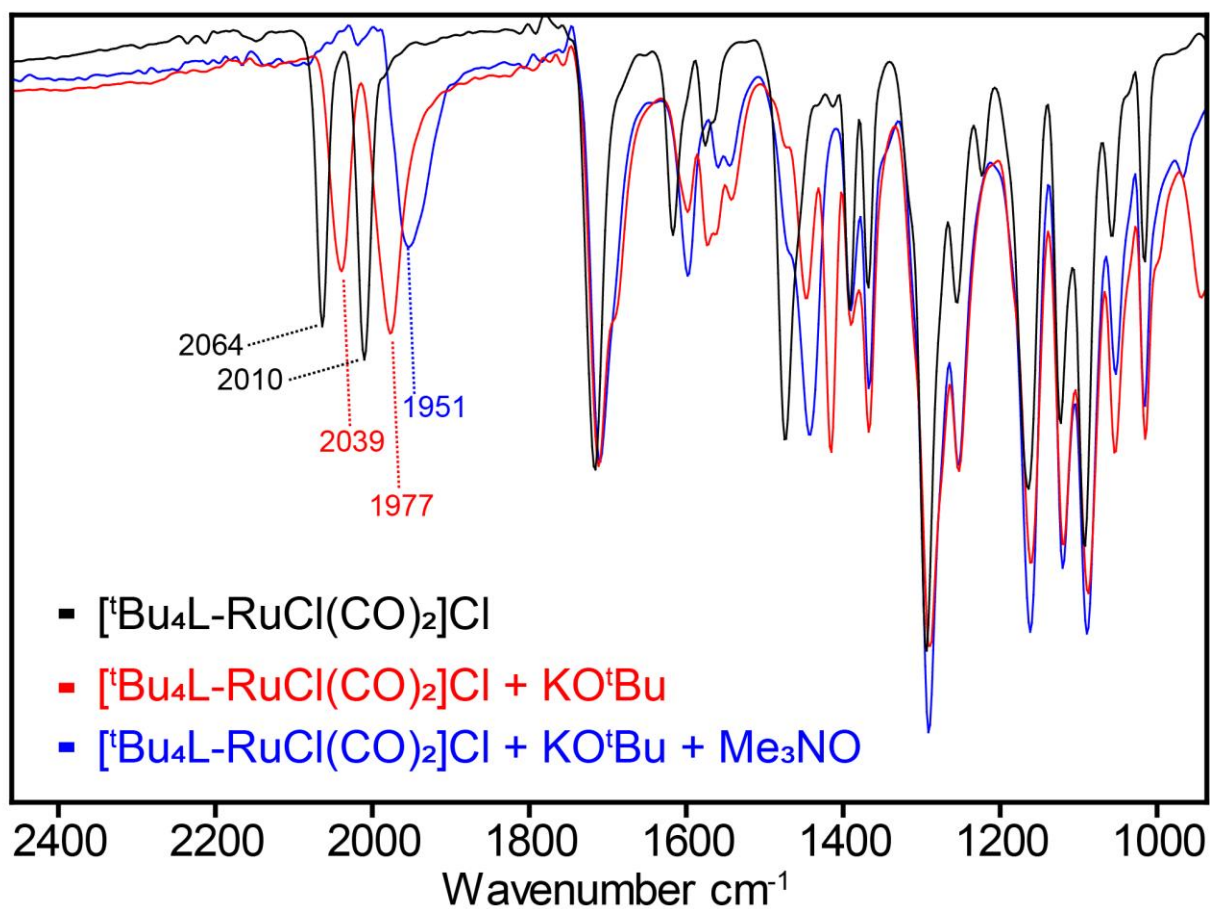

**Figure S48.** ATR-IR spectra for  $[\text{tBu}_4\text{L-RuCl}(\text{CO})_2]\text{Cl}$  reaction with  $\text{KO}^t\text{Bu}$  and  $\text{Me}_3\text{NO}$ .

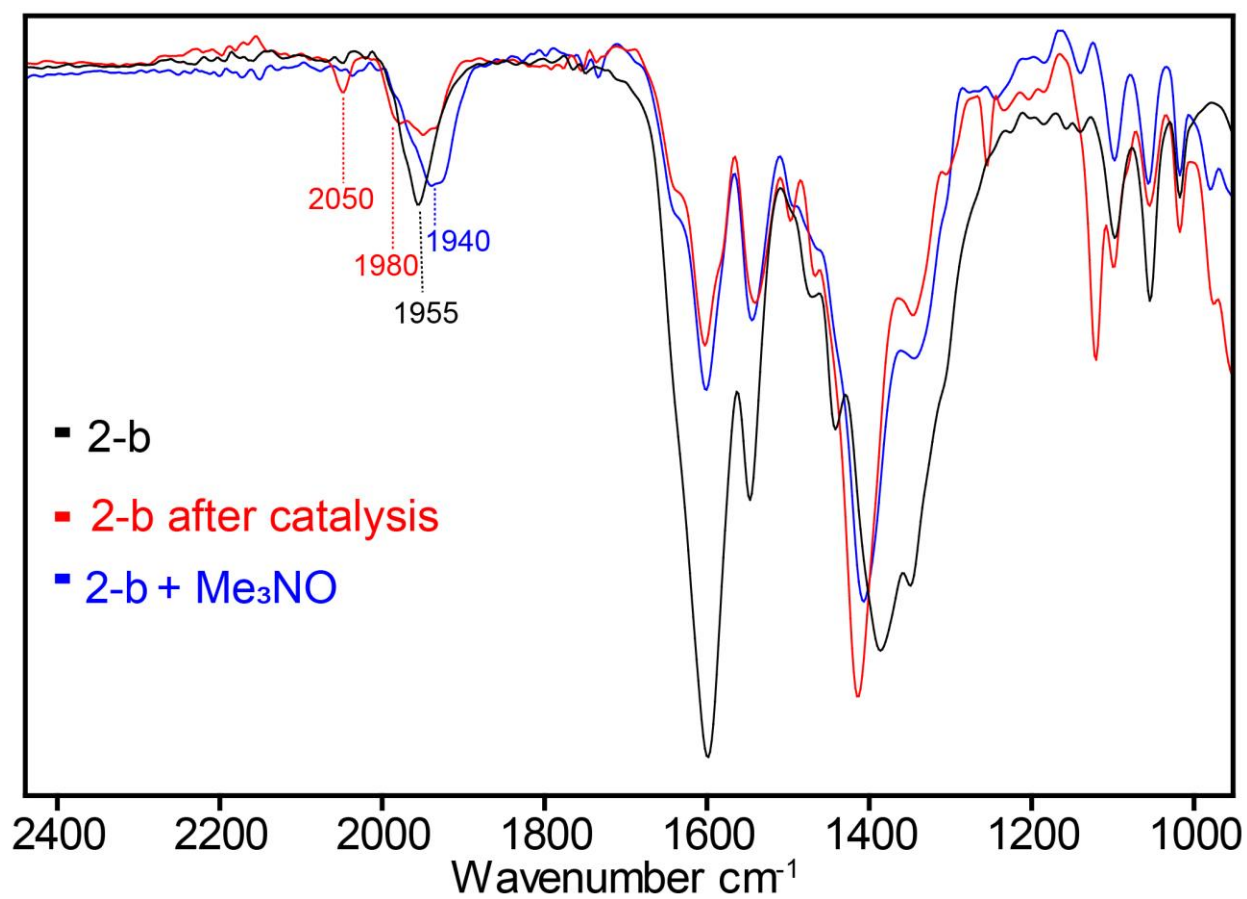

**Figure S49.** ATR-IR spectra for **2-b** before and after catalysis, and regeneration of **2-b** with Me<sub>3</sub>NO.

**Table S3.** Hydrosilylation of aryl aldehydes catalyzed by **2-b**<sup>a</sup>

| $\text{Ar}-\text{CHO} + \text{R}_3\text{SiH} \xrightarrow[\text{100 } ^\circ\text{C, 12 h}]{\text{5 mol \% [Ru], 1,4-dioxane}} \text{Ar}-\text{CH}_2\text{OSiR}_3$<br>( 2 equiv.) |                                                                                     |                                                                                     |                      |
|-----------------------------------------------------------------------------------------------------------------------------------------------------------------------------------|-------------------------------------------------------------------------------------|-------------------------------------------------------------------------------------|----------------------|
| Entry                                                                                                                                                                             | Substrate                                                                           | Product                                                                             | % Yield <sup>b</sup> |
| 1                                                                                                                                                                                 |    |    | 91                   |
| 2                                                                                                                                                                                 |    |    | 86                   |
| 3                                                                                                                                                                                 |    |    | 92                   |
| 4                                                                                                                                                                                 |    |    | 69                   |
| 5                                                                                                                                                                                 |   |   | 9                    |
| 6 <sup>c</sup>                                                                                                                                                                    |  |  | < 5                  |

<sup>a</sup>Reaction conditions: substrate (0.2 mmol), catalyst (0.01 mmol), Et<sub>3</sub>SiH (0.4 mmol), 1,4-dioxane (1 mL), 12 h, 100 °C. <sup>b</sup>Yields were determined by <sup>1</sup>H NMR with respect to an internal standard (hexamethylbenzene). <sup>c</sup>Ph<sub>3</sub>SiH (0.4 mmol) was used in place of Et<sub>3</sub>SiH.

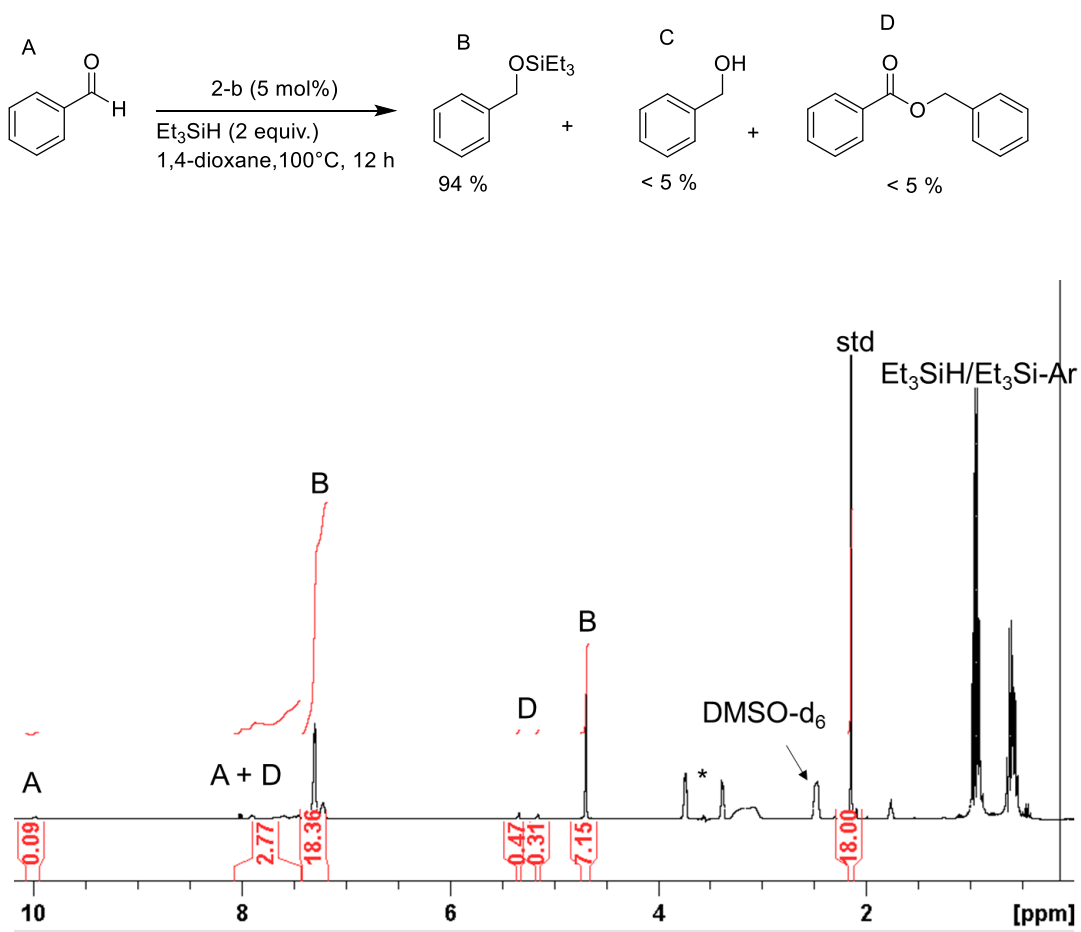

**Figure S50.**  $^1\text{H}$  NMR spectrum for hydrosilylation of benzaldehyde with **2-b**. (Substrate: hexamethylbenzene = 3.8:1). Asterisk (\*) is used to denote suppressed 1,4-dioxane.



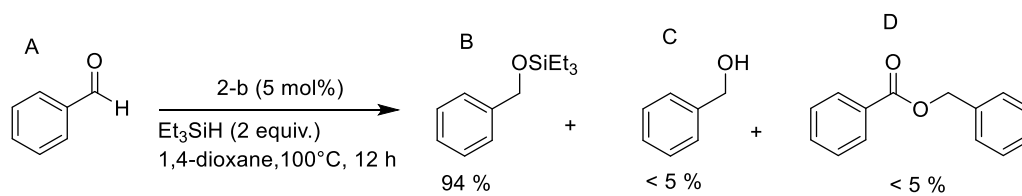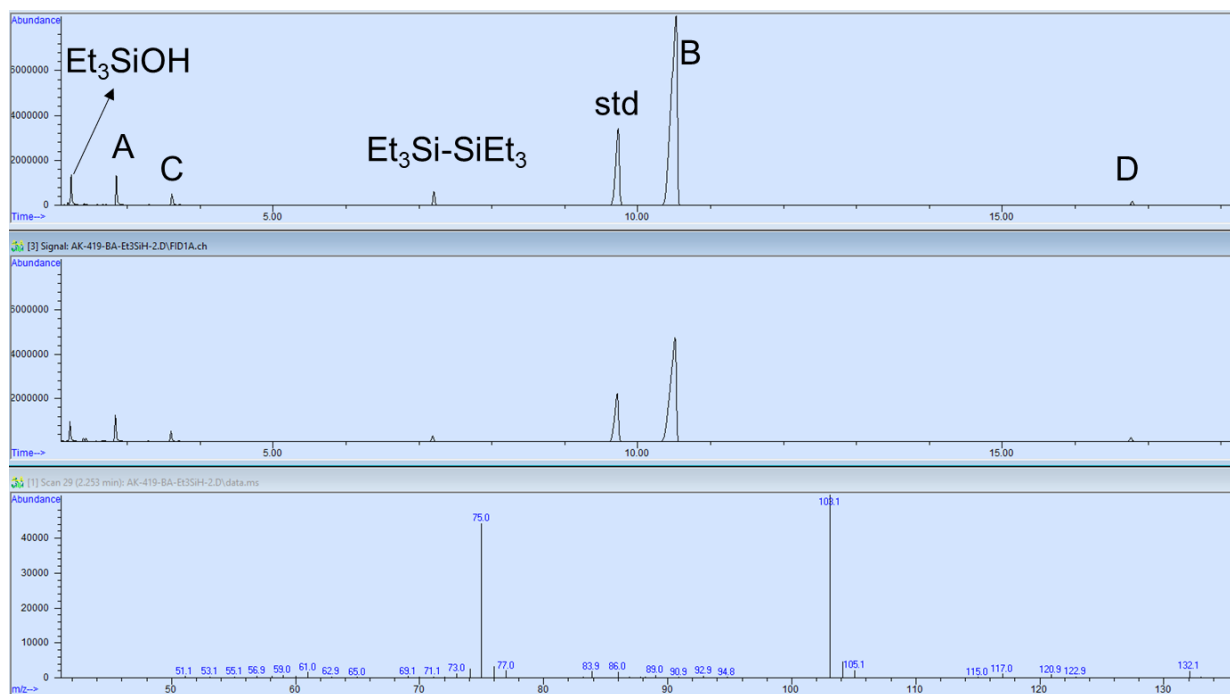

**Figure S51.** GC/MS chromatogram for the hydrosilylation of benzaldehyde with **2-b**.

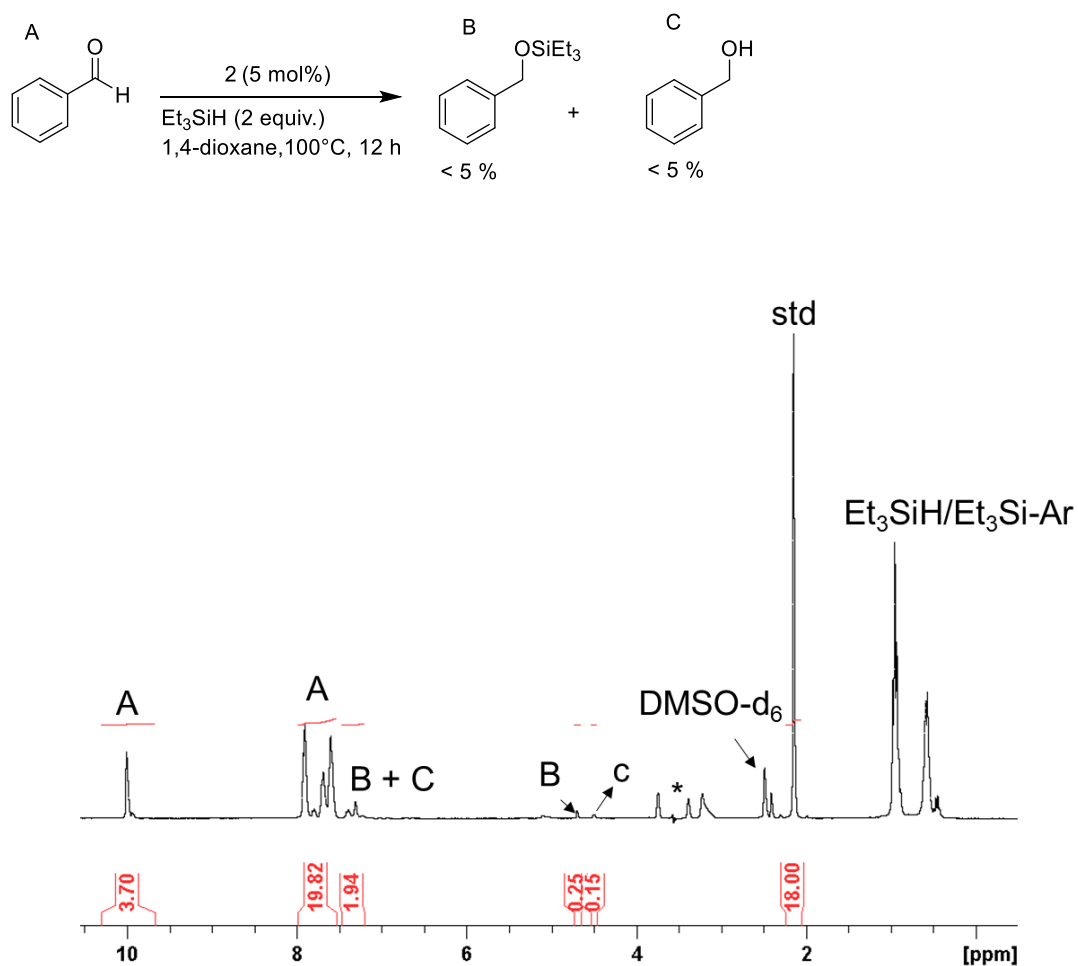

**Figure S52.**  $^1\text{H}$  NMR spectrum for hydrosilylation of benzaldehyde with **2**. (Substrate: hexamethylbenzene = 3.8:1). Asterisk (\*) is used to denote suppressed 1,4-dioxane.

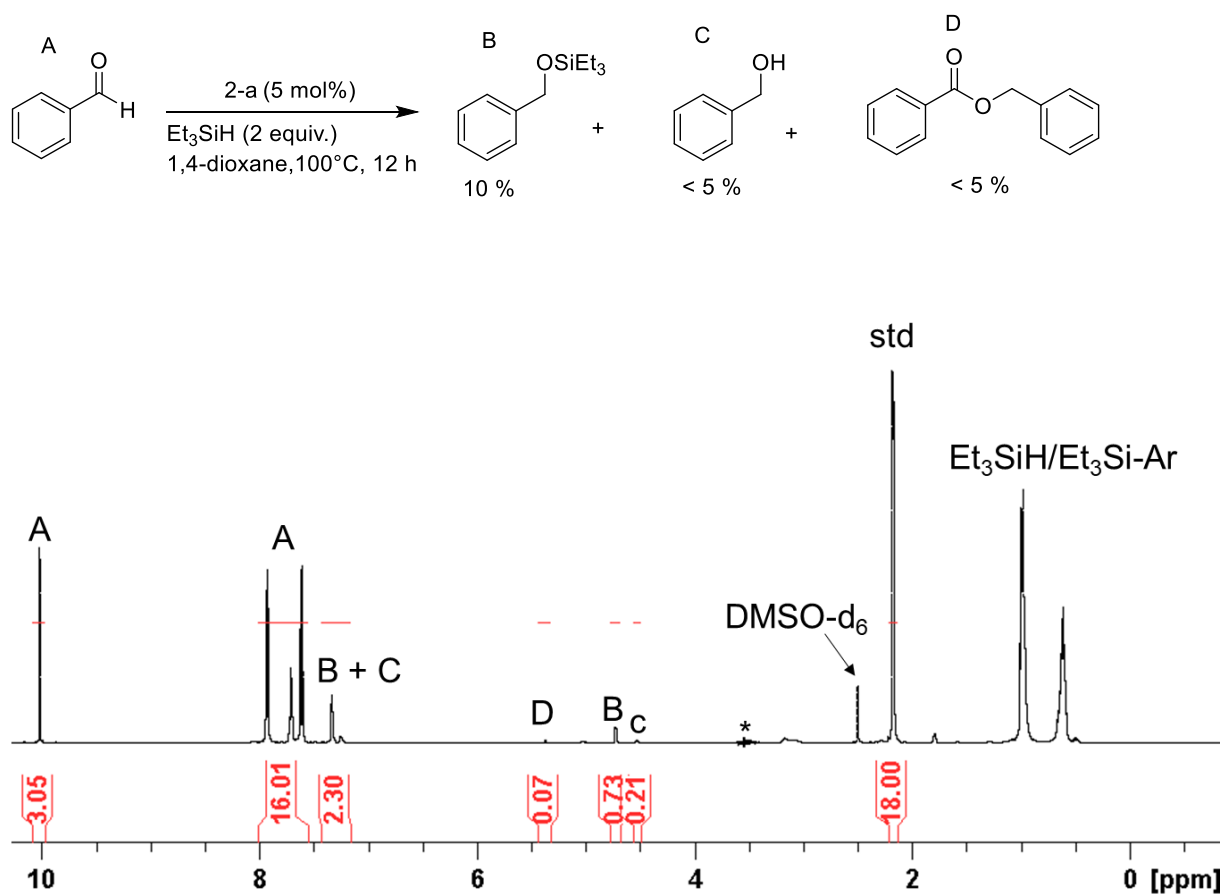

**Figure S53.**  $^1\text{H}$  NMR spectrum for hydrosilylation of benzaldehyde with **2-a**. (Substrate: hexamethylbenzene = 3.8:1). Asterisk (\*) is used to denote suppressed 1,4-dioxane.

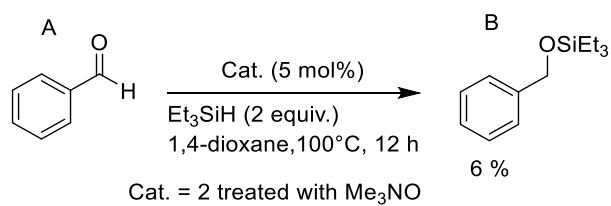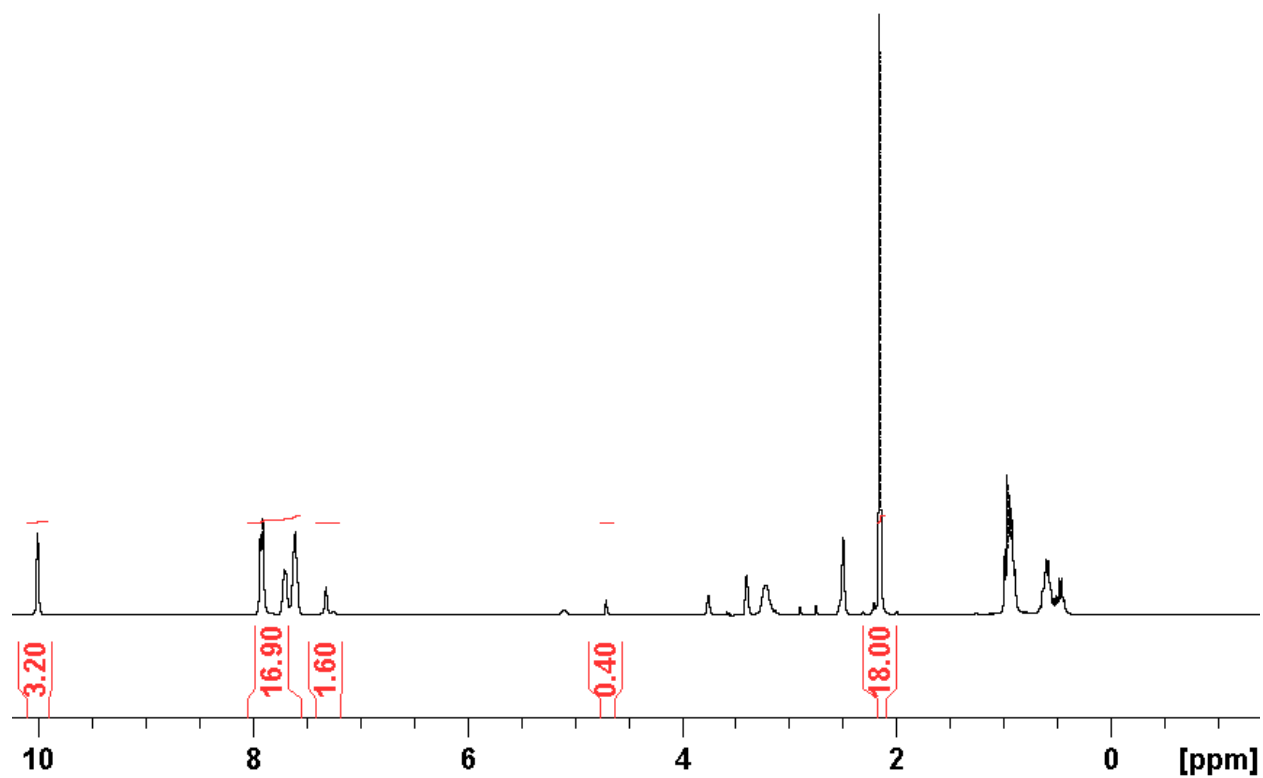

**Figure S54.** <sup>1</sup>H NMR spectrum for hydrosilylation of benzaldehyde with **2** treated with Me<sub>3</sub>NO. (Substrate: hexamethylbenzene = 3.3:1).

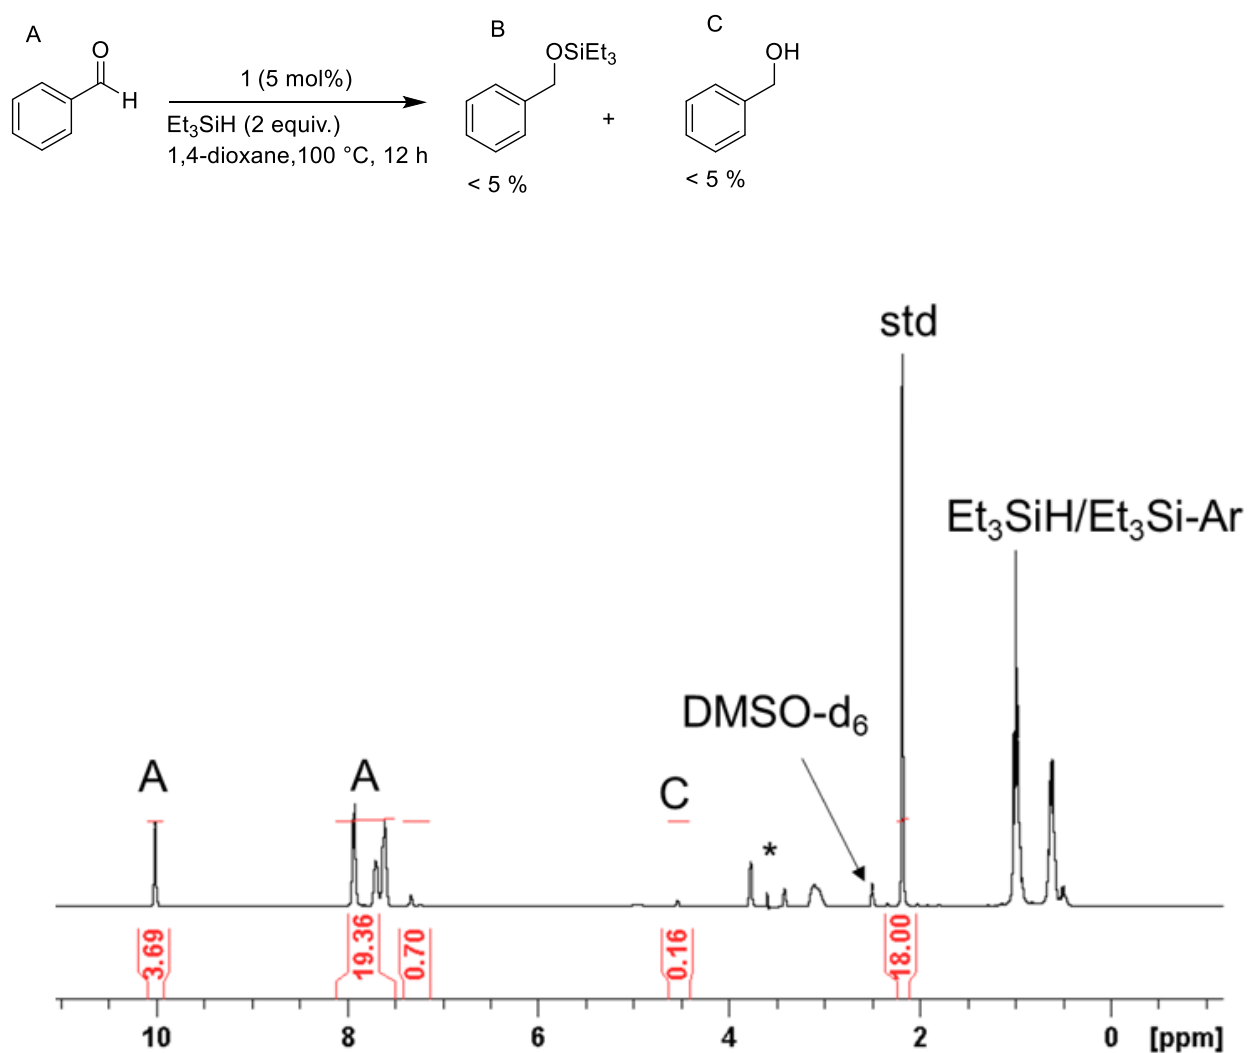

**Figure S55.**  $^1\text{H}$  NMR spectrum for hydrosilylation of benzaldehyde with **1**. (Substrate: hexamethylbenzene = 3.98:1). Asterisk (\*) is used to denote suppressed 1,4-dioxane.

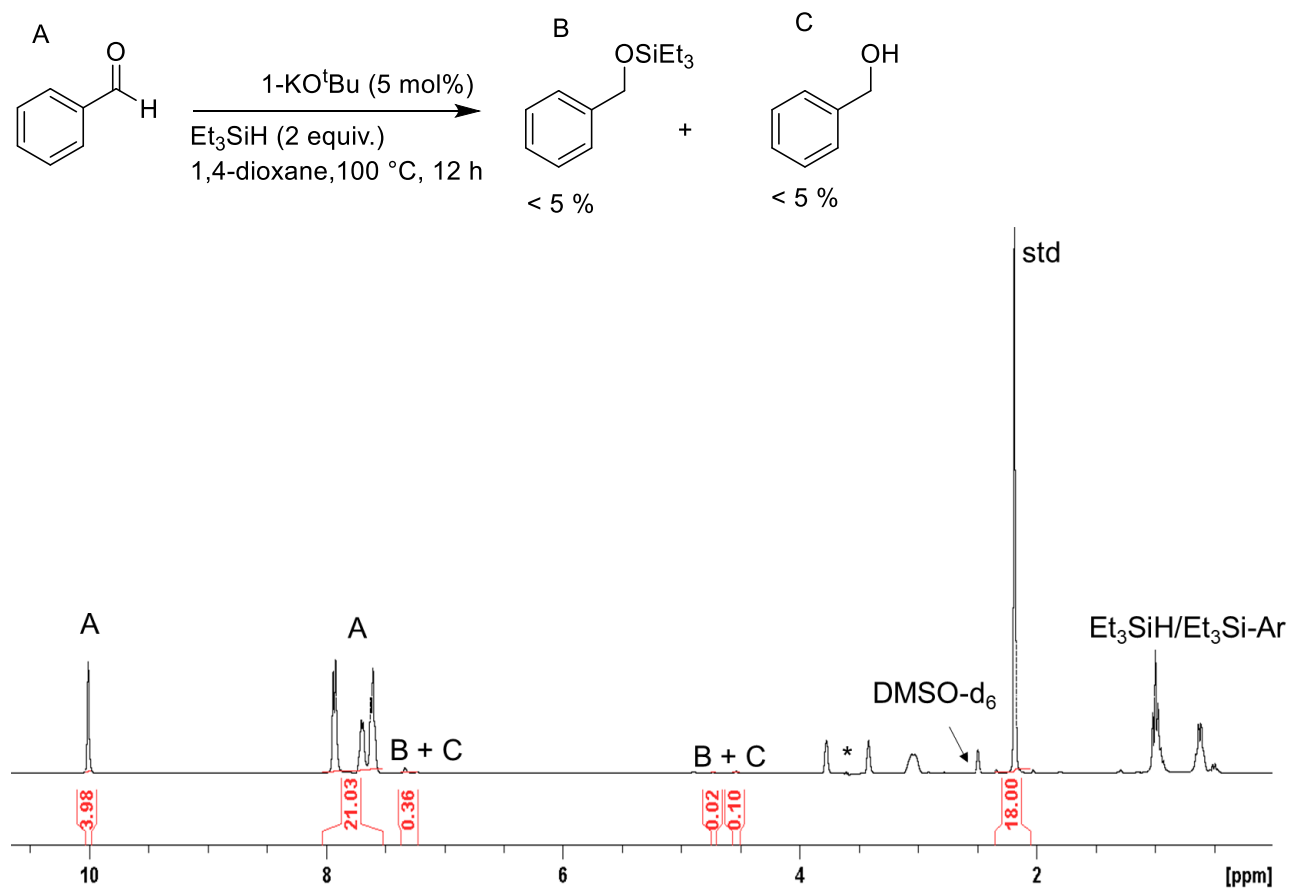

**Figure S56.**  $^1\text{H}$  NMR spectrum for hydrosilylation of benzaldehyde with  $1\text{-KO}^t\text{Bu}$ . (Substrate: hexamethylbenzene = 4:1). Asterisk (\*) is used to denote suppressed 1,4-dioxane.

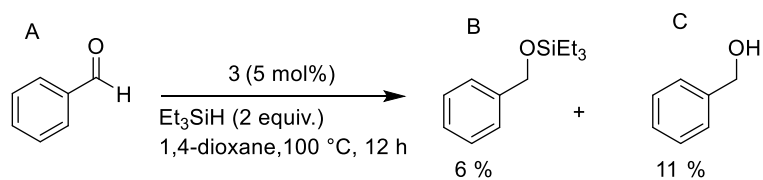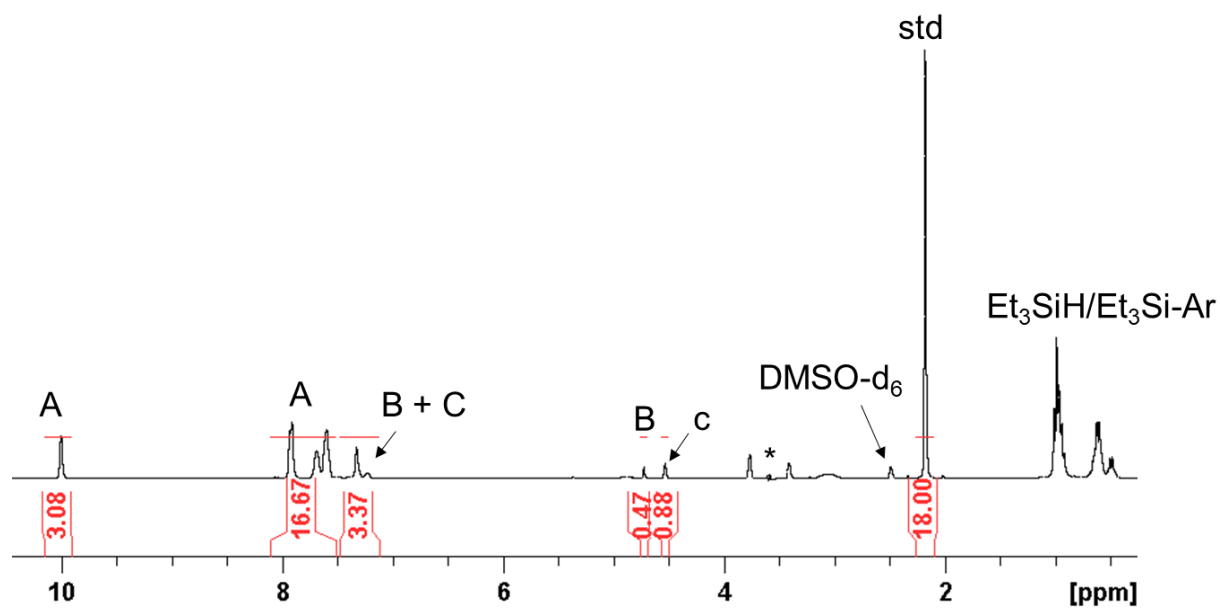

**Figure S57.**  $^1\text{H}$  NMR spectrum for hydrosilylation of benzaldehyde with **3**. (Substrate: hexamethylbenzene = 3.8:1). Asterisk is used to denote suppressed 1,4-dioxane.

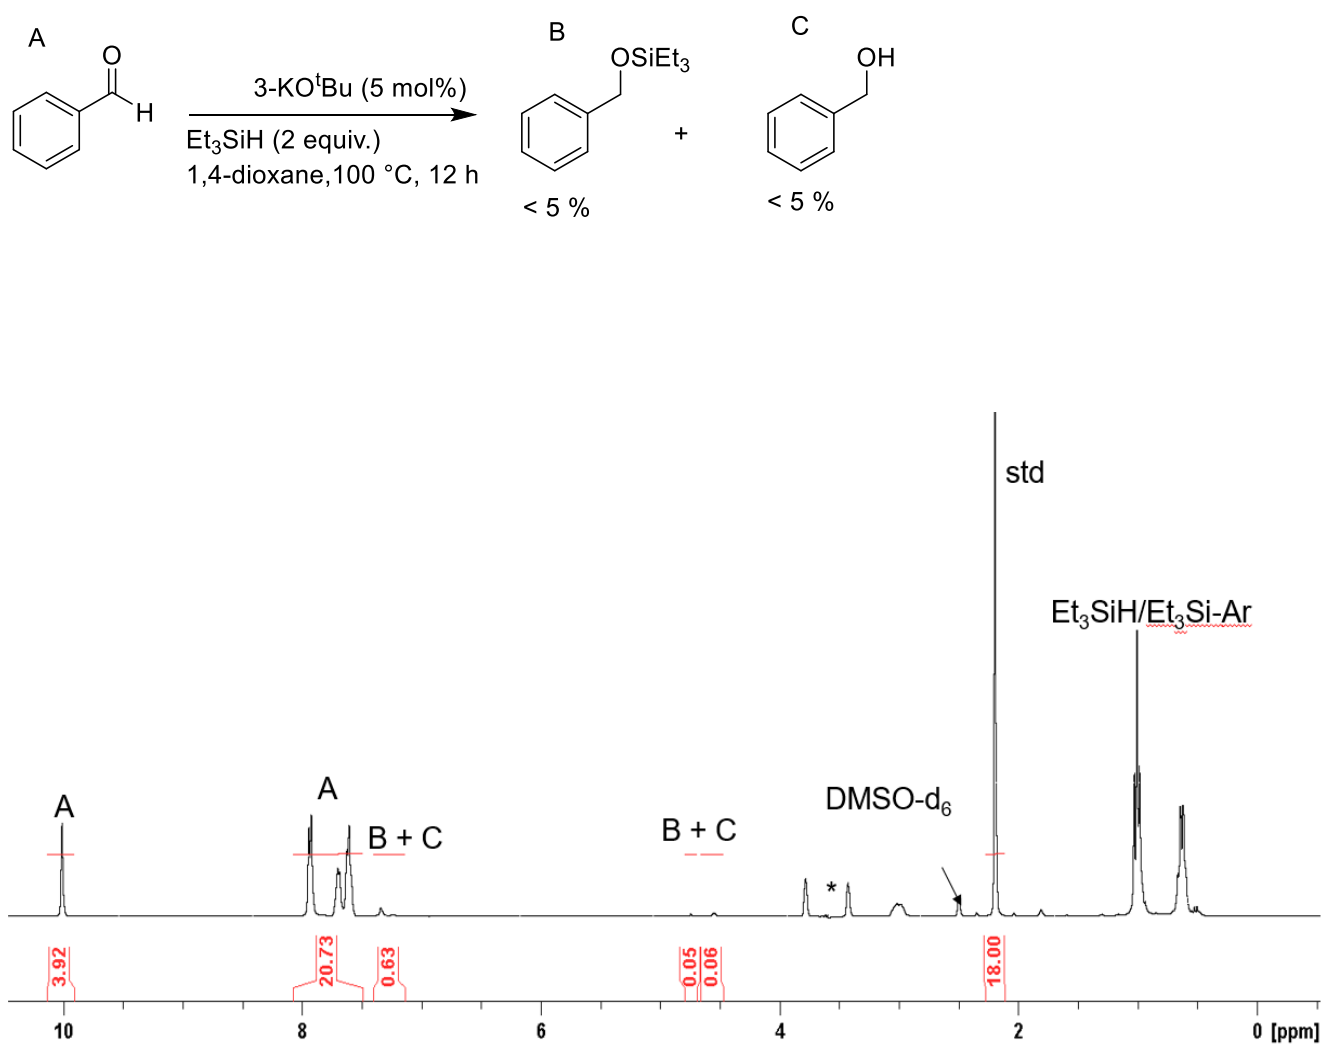

**Figure S58.**  $^1\text{H}$  NMR spectrum for hydrosilylation of benzaldehyde with **3-KO<sup>t</sup>Bu**. (Substrate: hexamethylbenzene = 4:1). Asterisk is used to denote suppressed 1,4-dioxane.



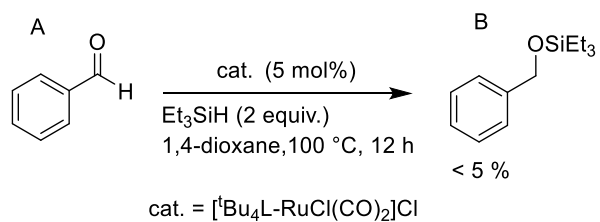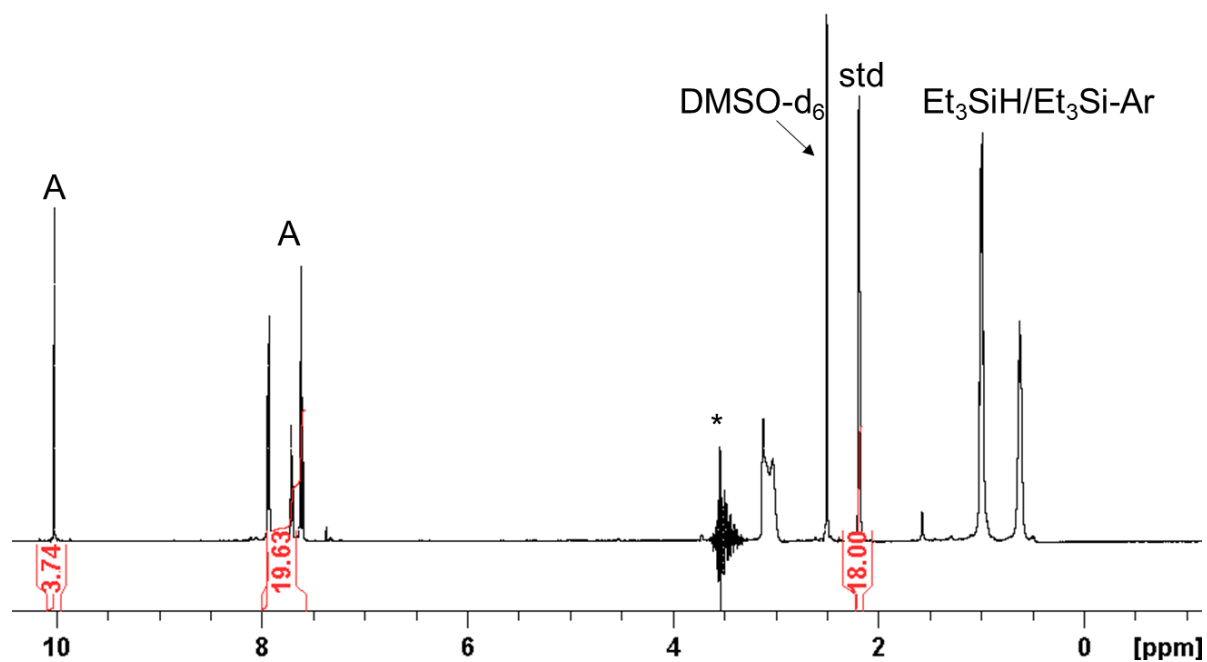

**Figure S59.**  $^1\text{H}$  NMR spectrum for hydrosilylation of benzaldehyde with  $[\text{tBu}_4\text{L-RuCl(CO)}_2]\text{Cl}$ . (Substrate: hexamethylbenzene = 3.8:1). Asterisk (\*) is used to denote suppressed 1,4-dioxane.

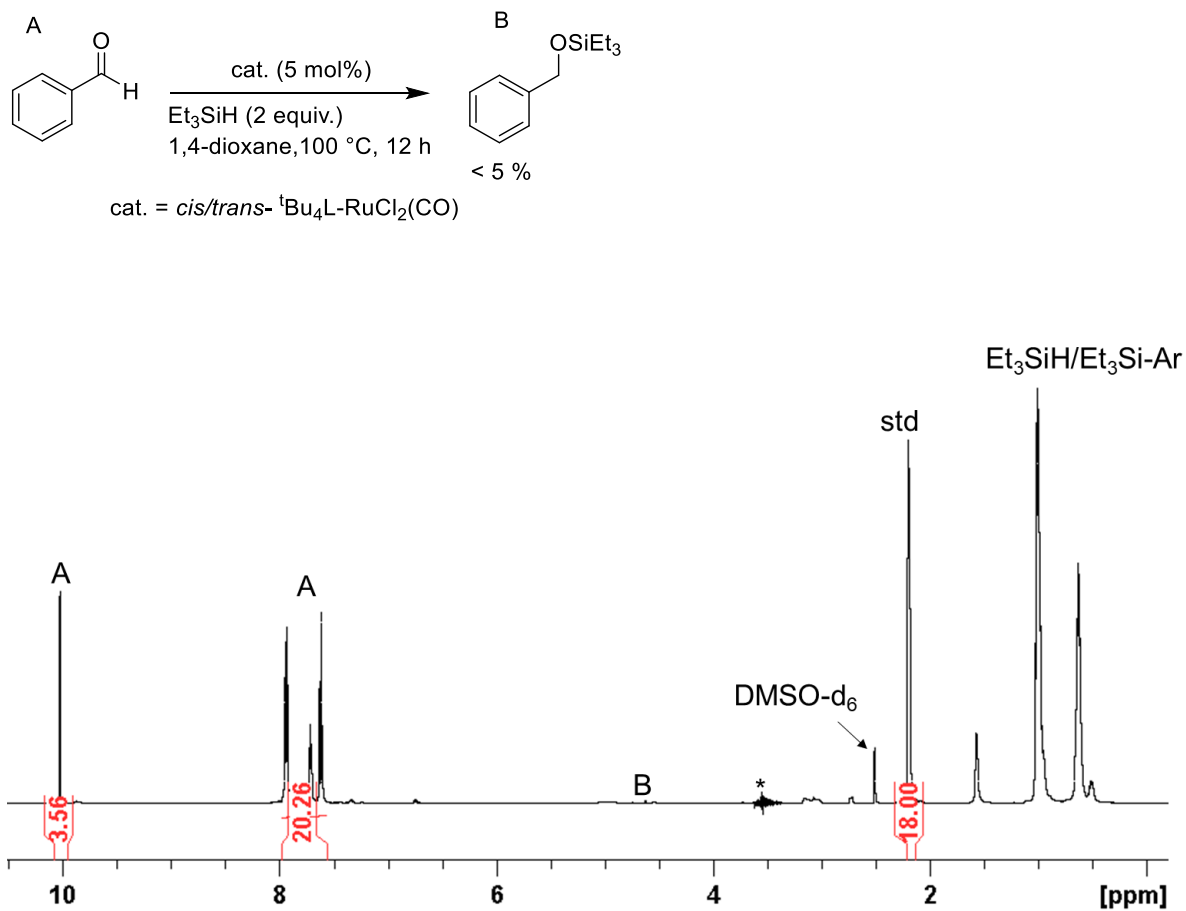

**Figure S60.** <sup>1</sup>H NMR spectrum for hydrosilylation of benzaldehyde with *cis/trans*-<sup>t</sup>Bu<sub>4</sub>L-RuCl<sub>2</sub>(CO). (Substrate: hexamethylbenzene = 3.8:1). Asterisk (\*) is used to denote suppressed 1,4-dioxane.

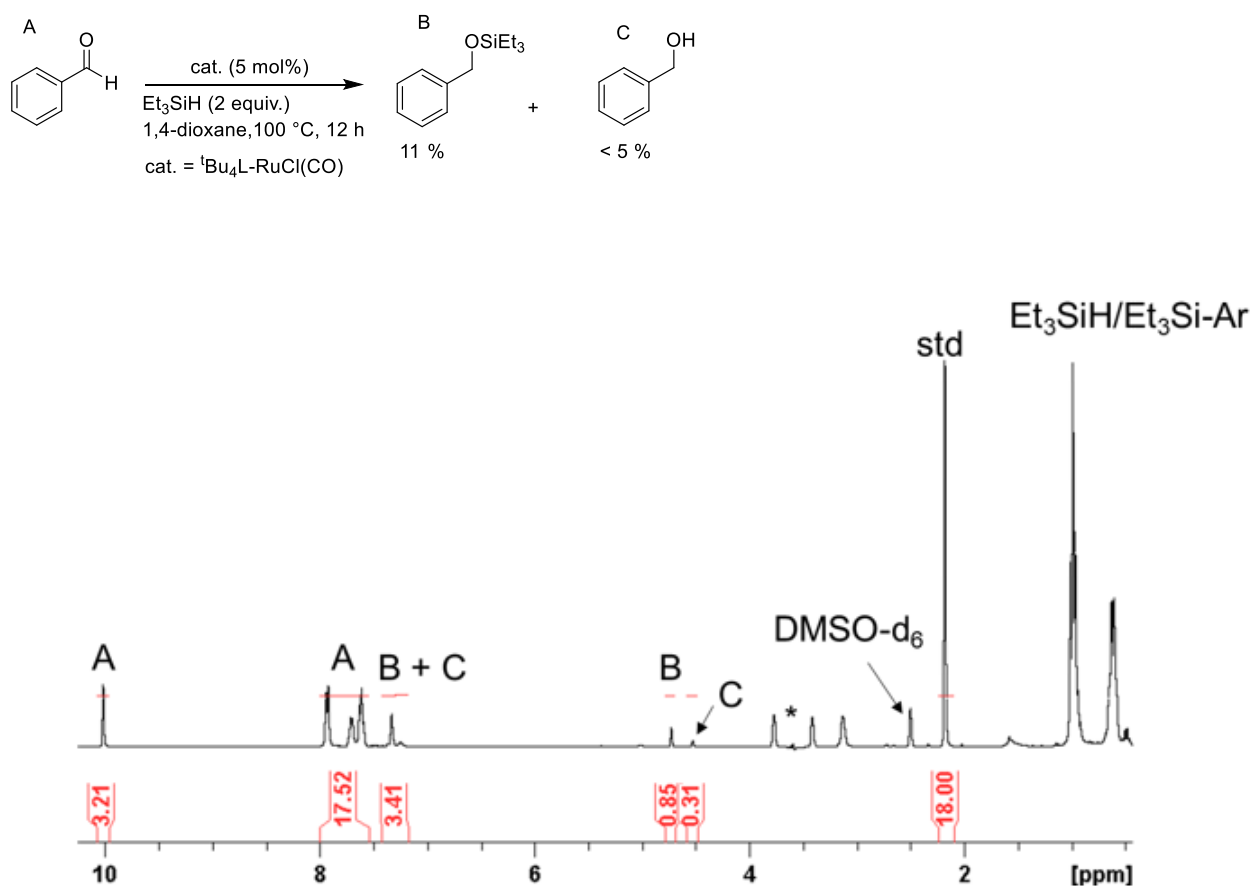

**Figure S61.**  $^1\text{H}$  NMR spectrum for hydrosilylation of benzaldehyde with  $[\text{tBu}_4\text{L-RuCl}(\text{CO})_2]\text{Cl}$  pretreated with  $\text{KO}^t\text{Bu}$  and  $\text{Me}_3\text{NO}$ . (Substrate: hexamethylbenzene = 3.8:1). Asterisk (\*) is used to denote suppressed 1,4-dioxane.

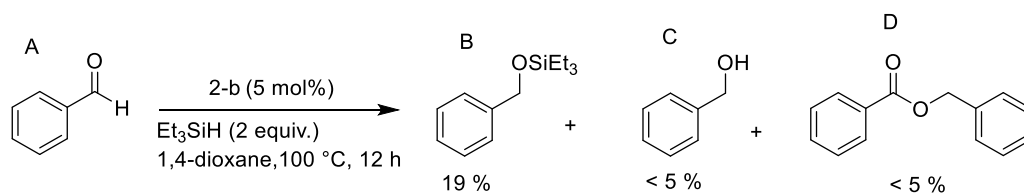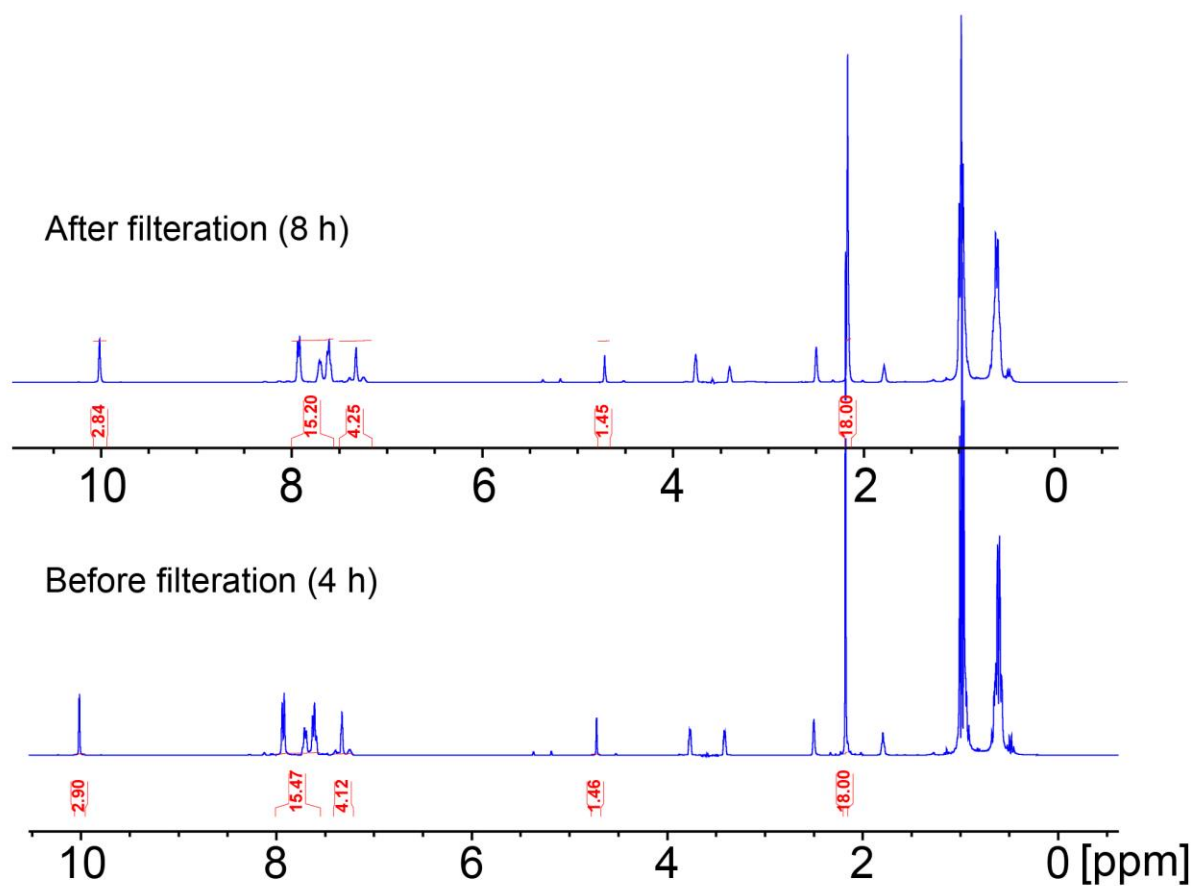

**Figure S62.**  $^1\text{H}$  NMR spectra before (bottom) and after (top) hot filtration for hydrosilylation of benzaldehyde with **2-b**. (Substrate: hexamethylbenzene = 3.8:1). Asterisk (\*) is used to denote suppressed 1,4-dioxane.

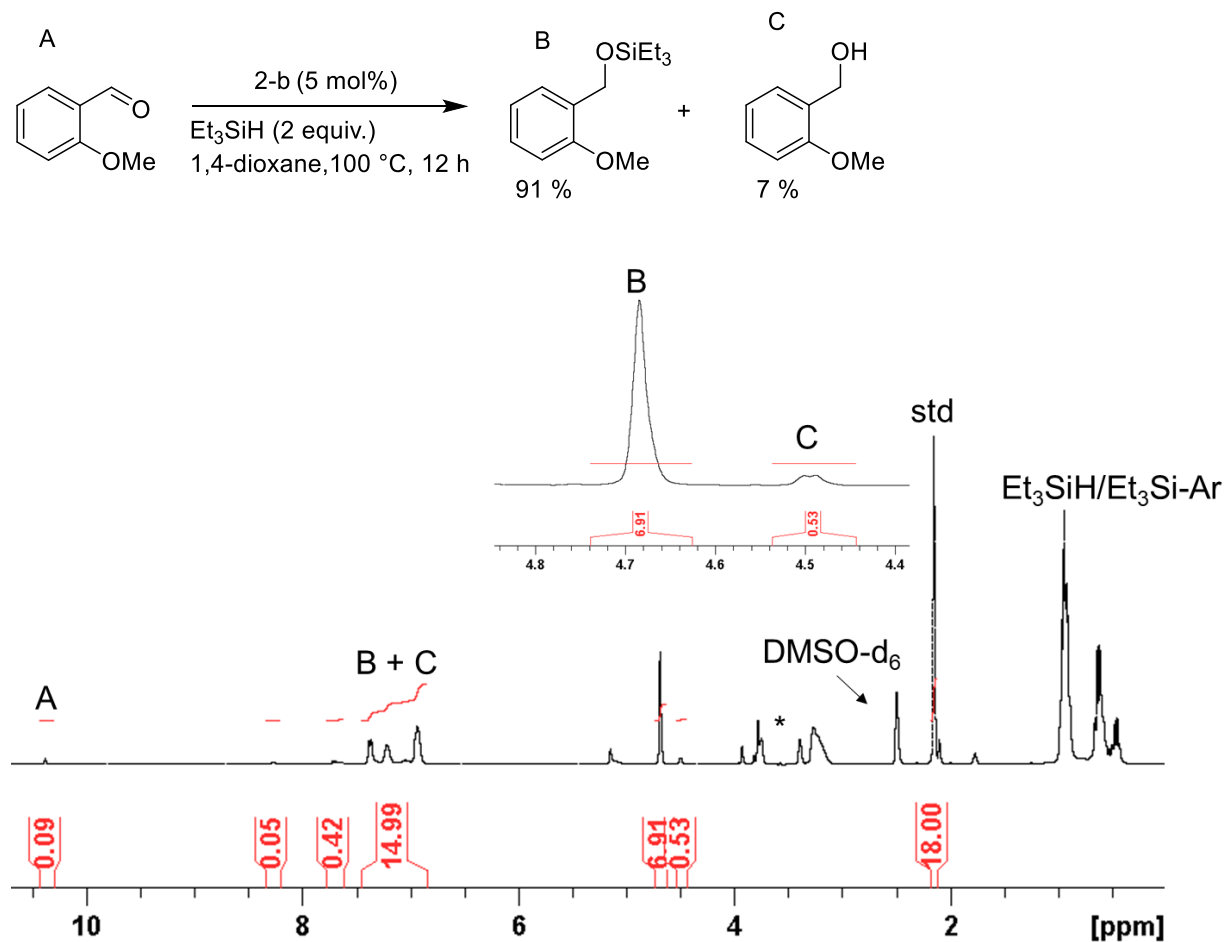

**Figure S63.** <sup>1</sup>H NMR spectrum for hydrosilylation of o-anisaldehyde with **2-b**. (Substrate: hexamethylbenzene = 3.8:1). Asterisk (\*) is used to denote suppressed 1,4-dioxane.

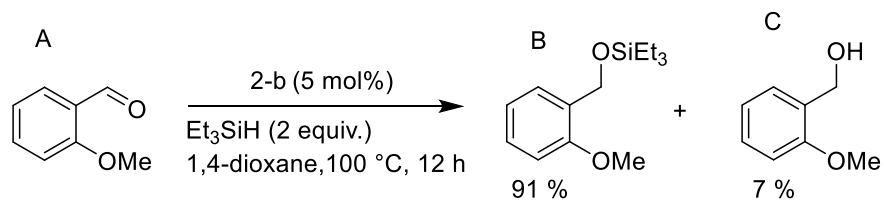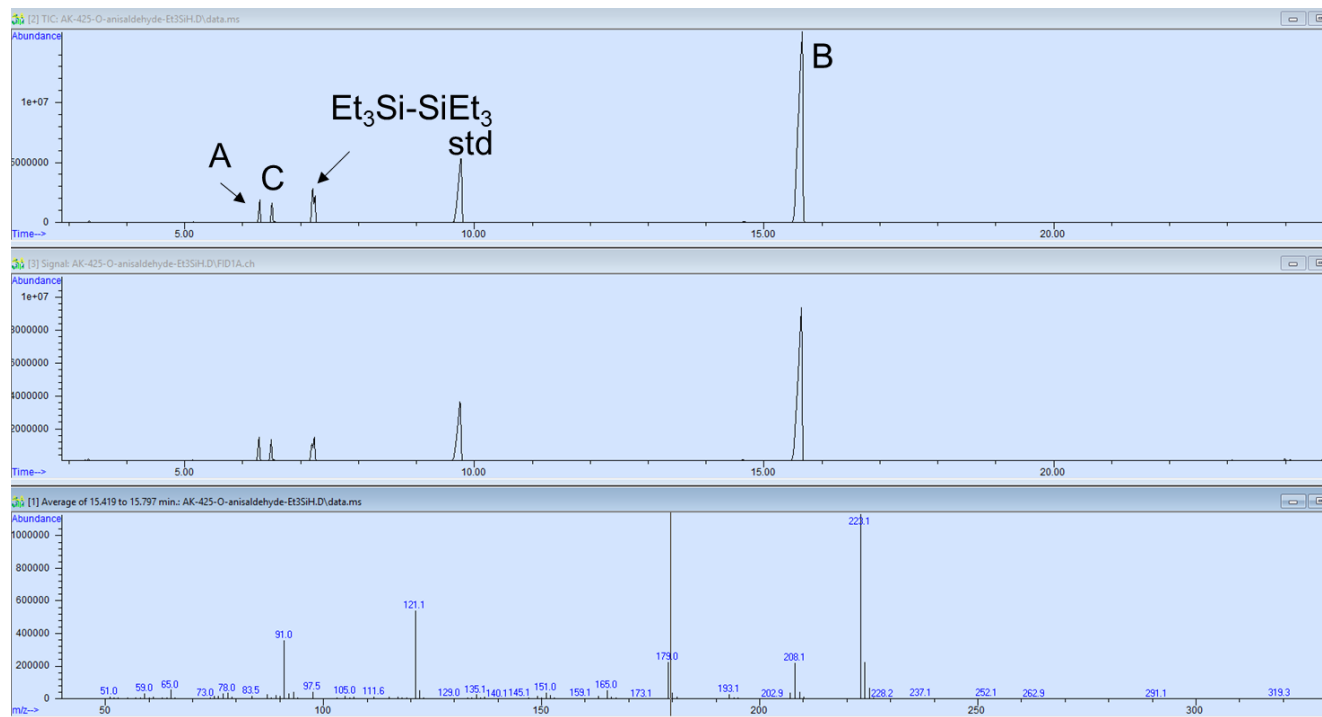

**Figure S64.** GC/MS chromatogram for the hydrosilylation of O-anisaldehyde with **2-b**.

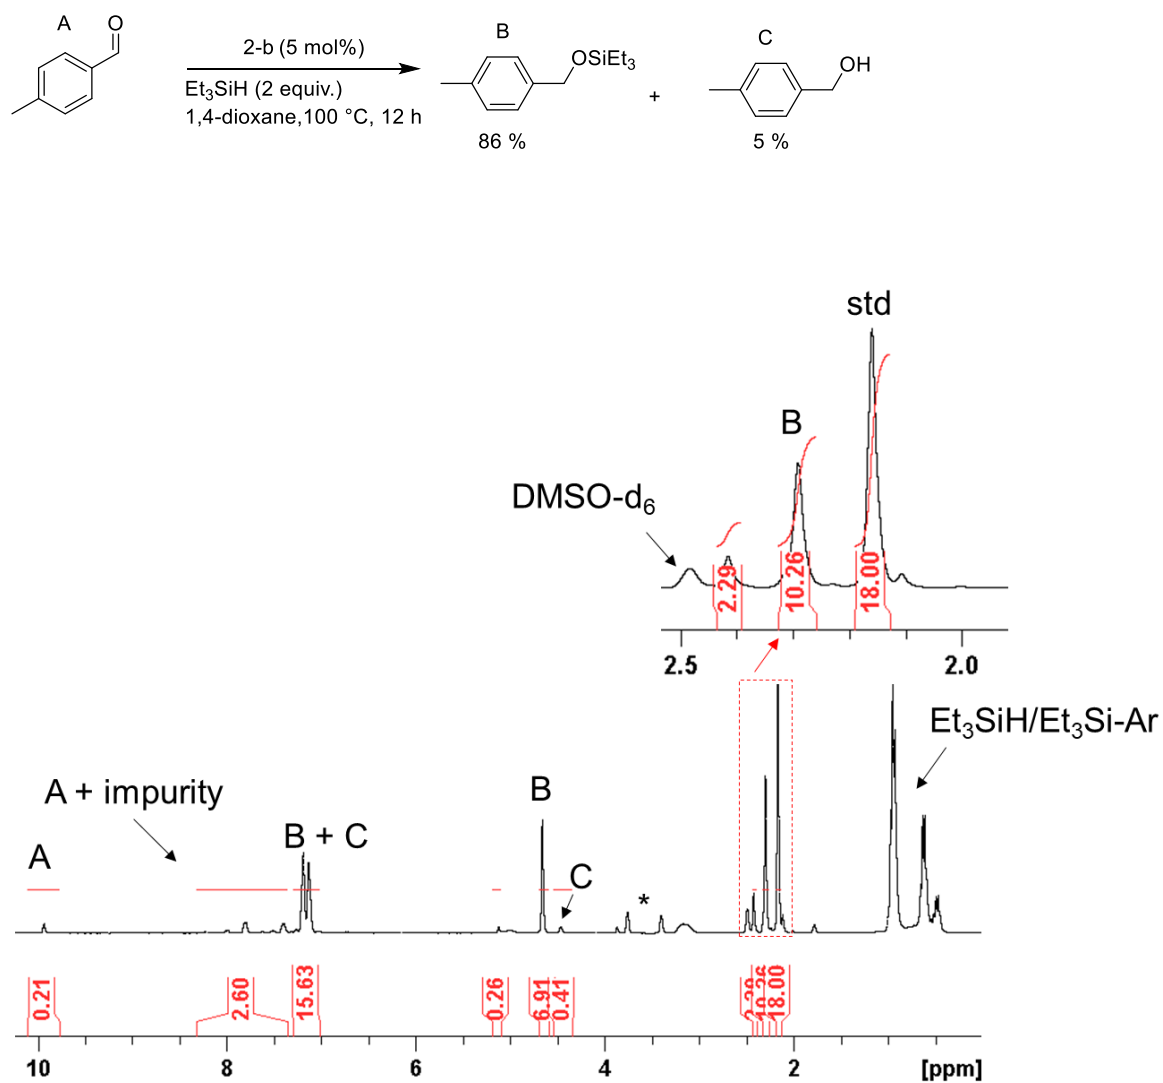

**Figure S65.**  $^1\text{H}$  NMR spectrum for hydrosilylation of 4-methylbenzaldehyde with **2-b**. (Substrate: hexamethylbenzene = 4:1). The substrate had some impurity that was not removed after distillation. GC/MS analysis of the substrate predicts the impurity as methyl benzoate. Asterisk (\*) is used to denote suppressed 1,4-dioxane.

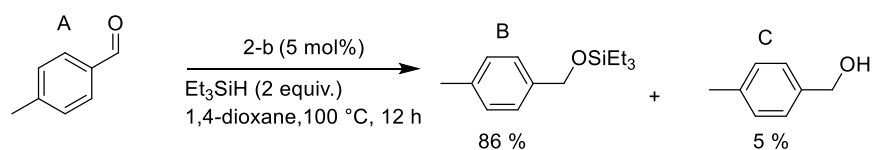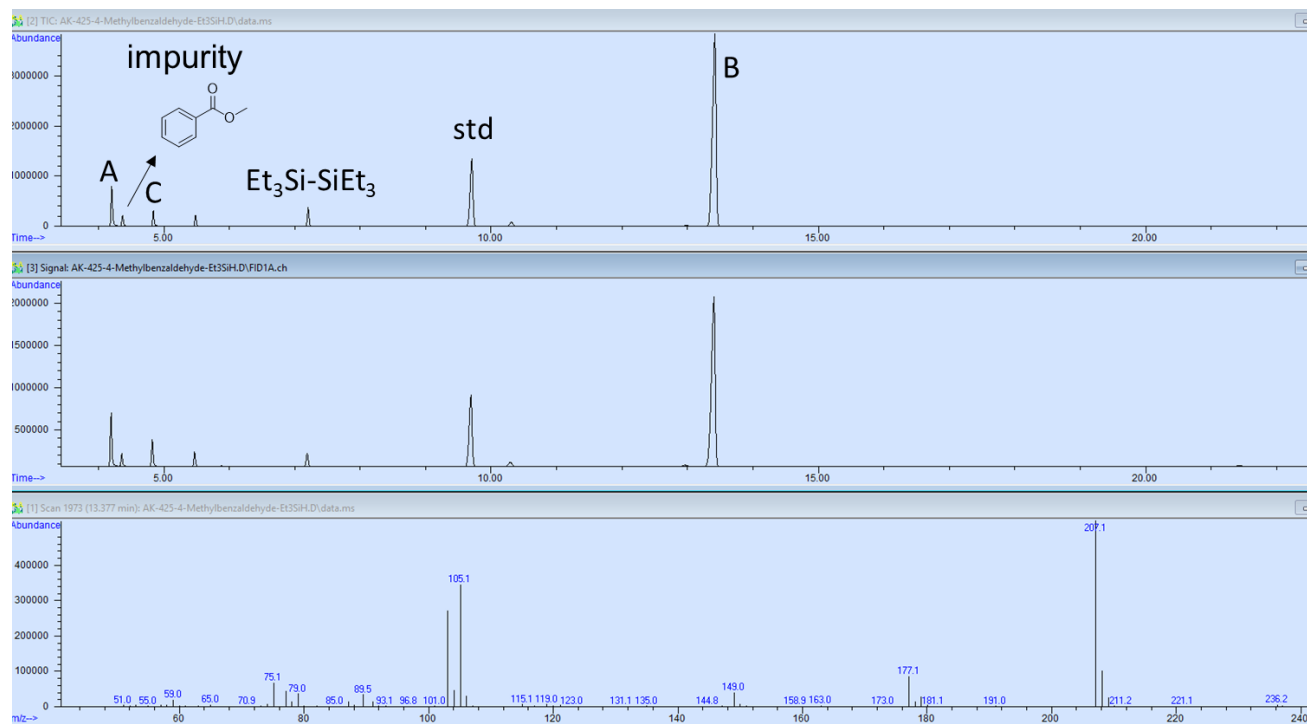

**Figure S66.** GC/MS chromatogram for the hydrosilylation of 4-methylbenzaldehyde with **2-b**.



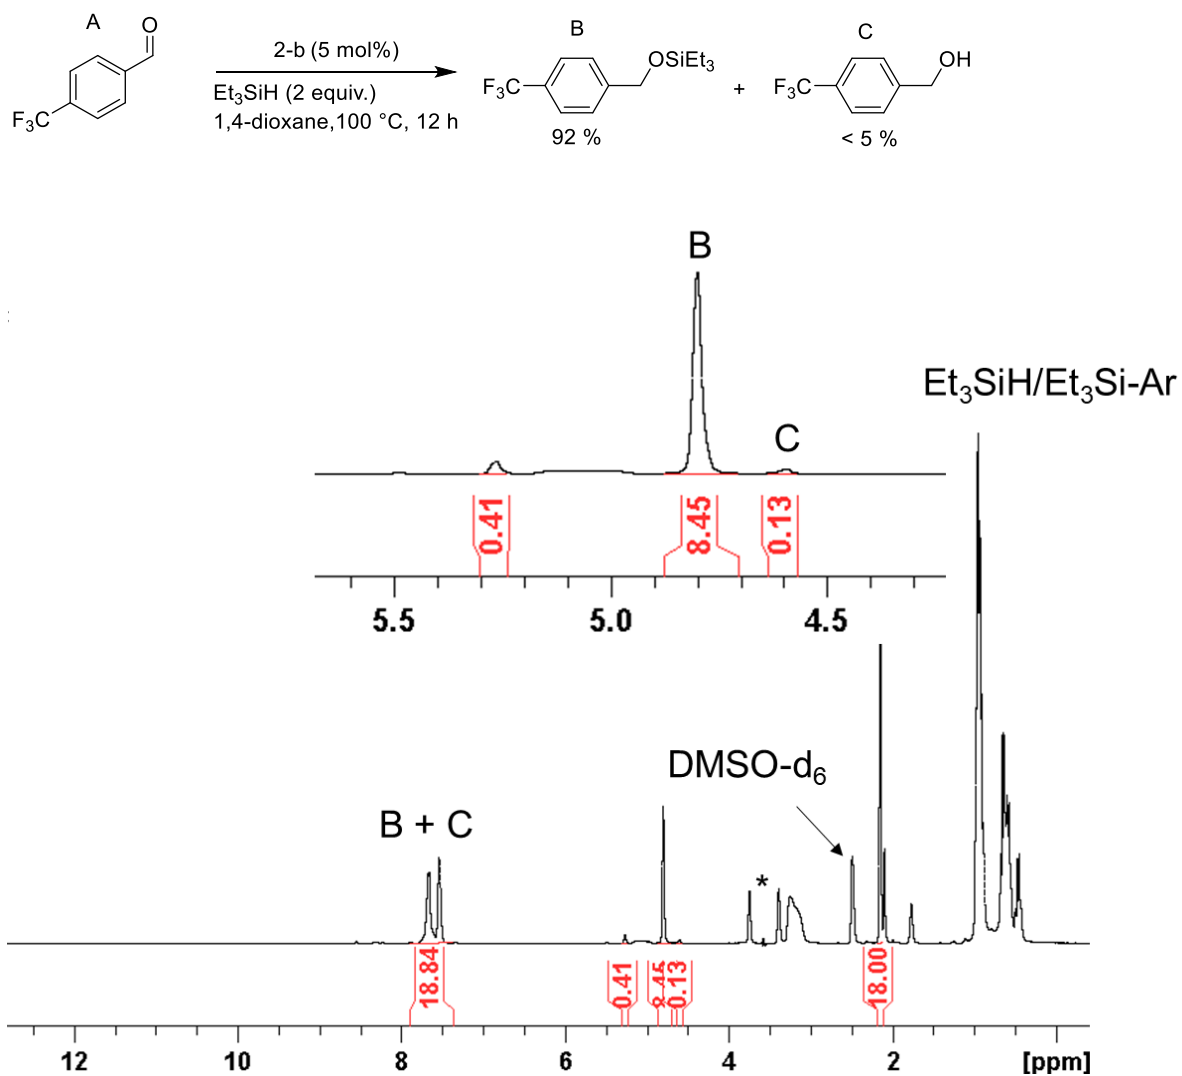

**Figure S67.**  $^1\text{H}$  NMR spectrum for hydrosilylation of 4-(Trifluoromethyl)benzaldehyde with **2-b**. (Substrate: hexamethylbenzene = 4.6:1). Asterisk (\*) is used to denote suppressed 1,4-dioxane.

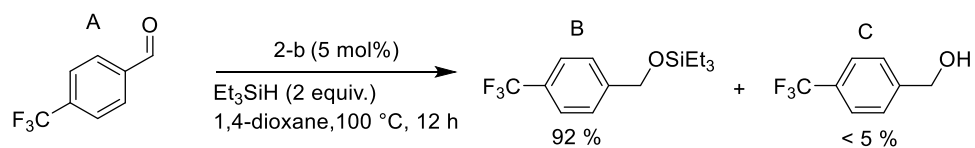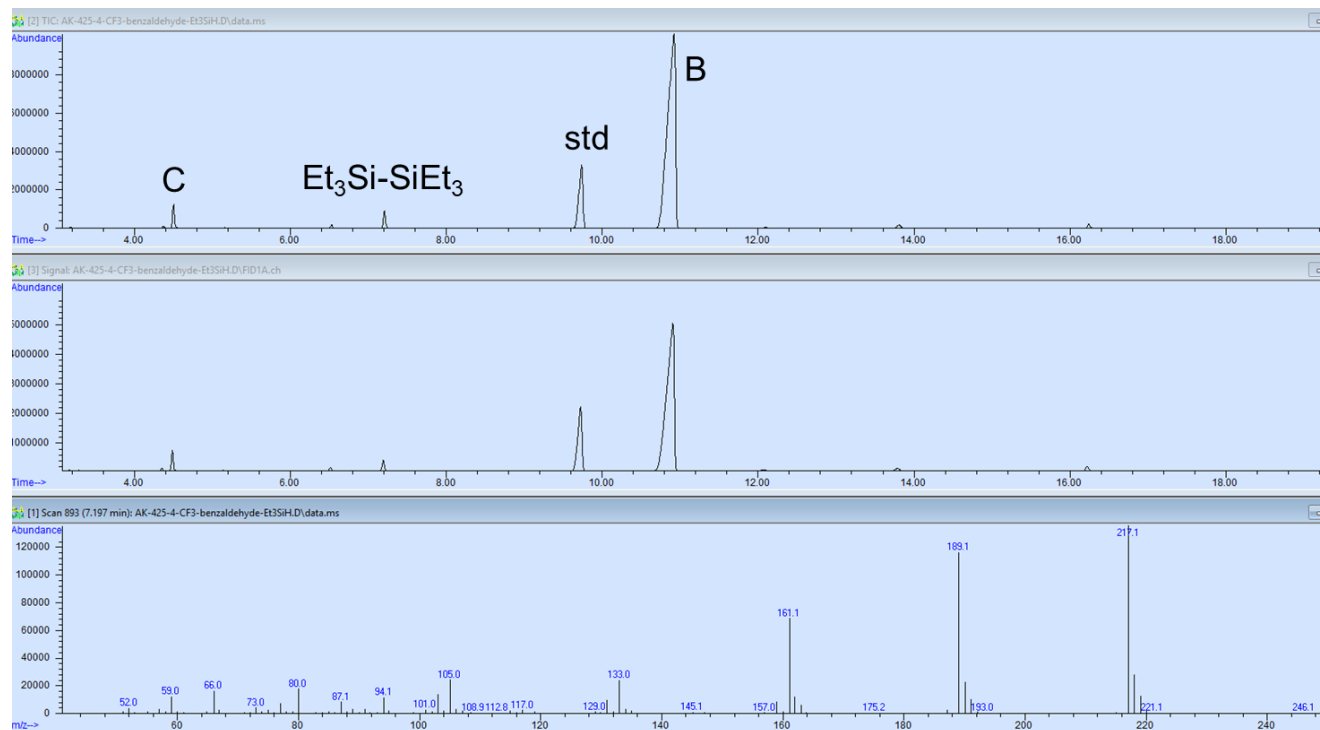

**Figure S68.** GC/MS chromatogram for the hydrosilylation of 4-(Trifluoromethyl)benzaldehyde with **2-b**.

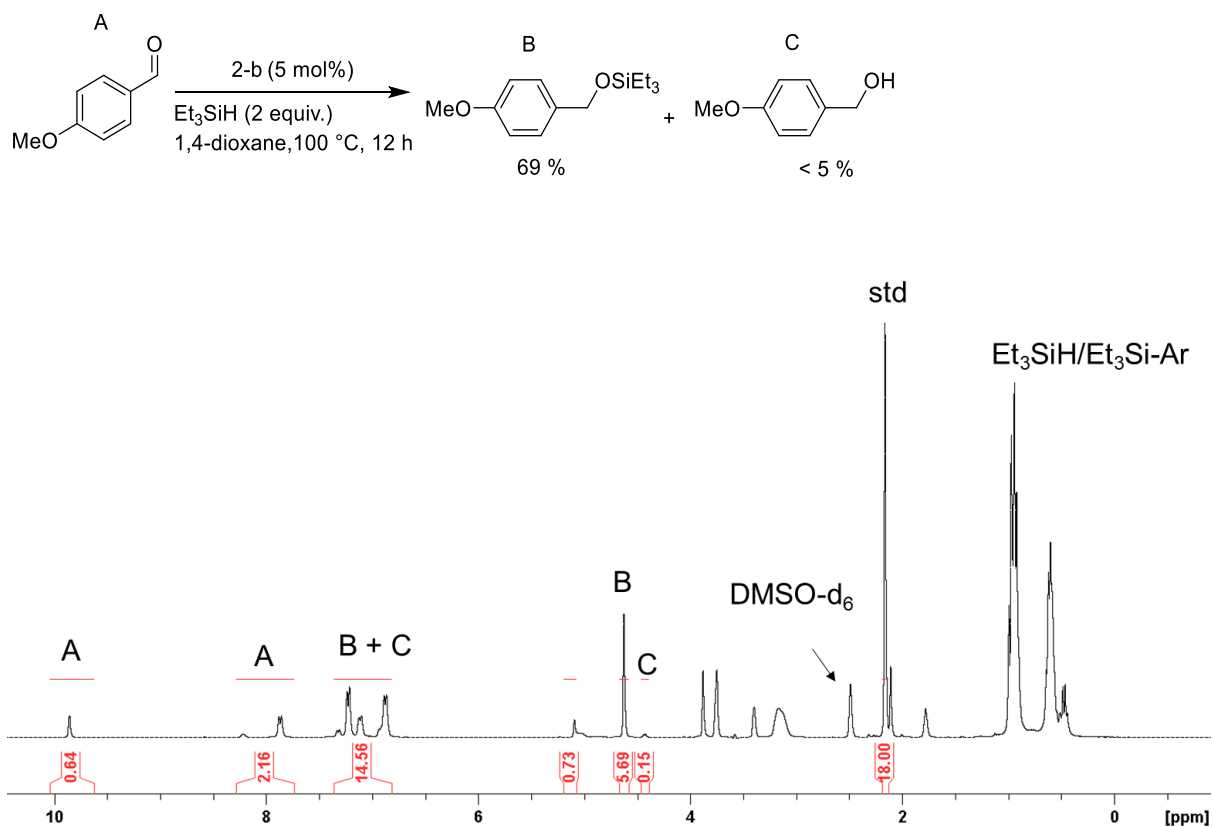

**Figure S69.**  $^1\text{H}$  NMR spectrum for the hydrosilylation of 4-methoxybenzaldehyde with **2-b**. (Substrate: hexamethylbenzene = 4.1:1). Asterisk (\*) is used to denote suppressed 1,4-dioxane.

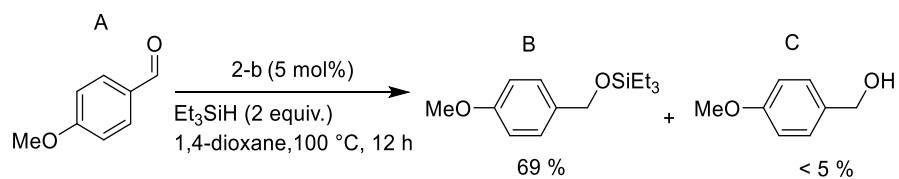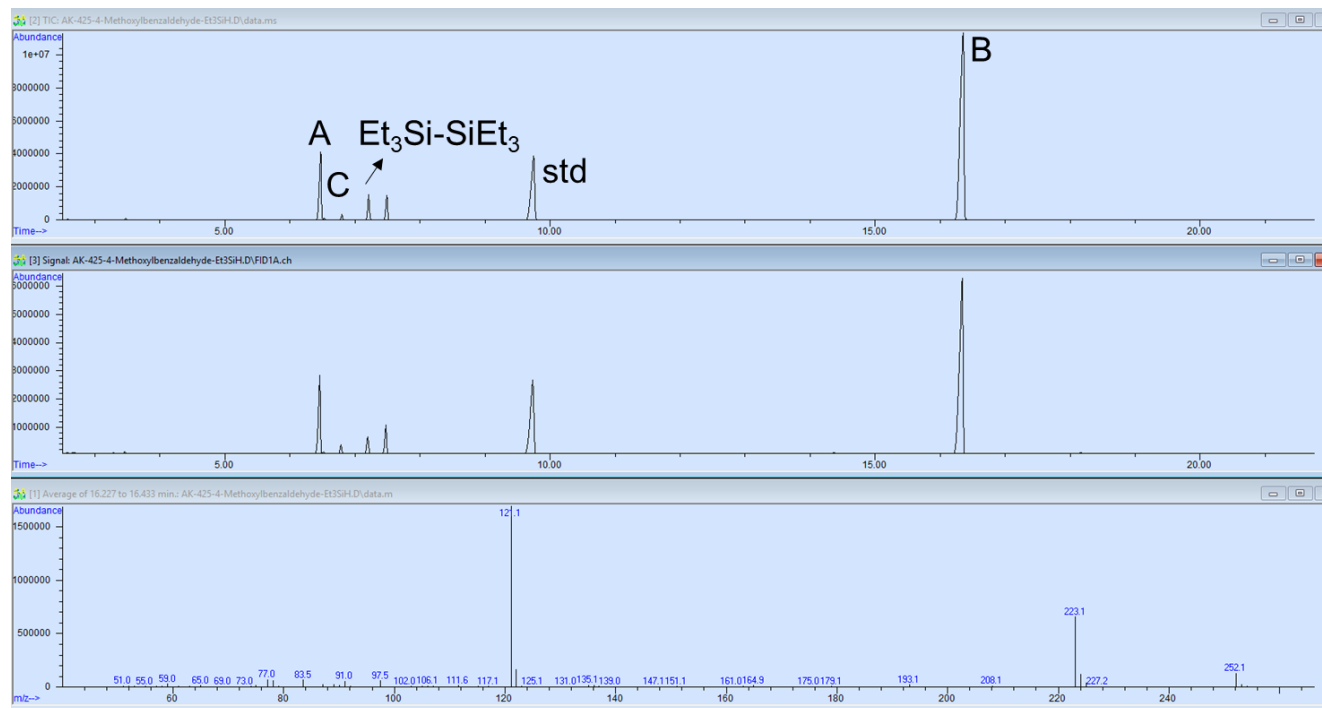

**Figure S70.** GC/MS chromatogram for the hydrosilylation of 4-methoxybenzaldehyde with **2-b**.

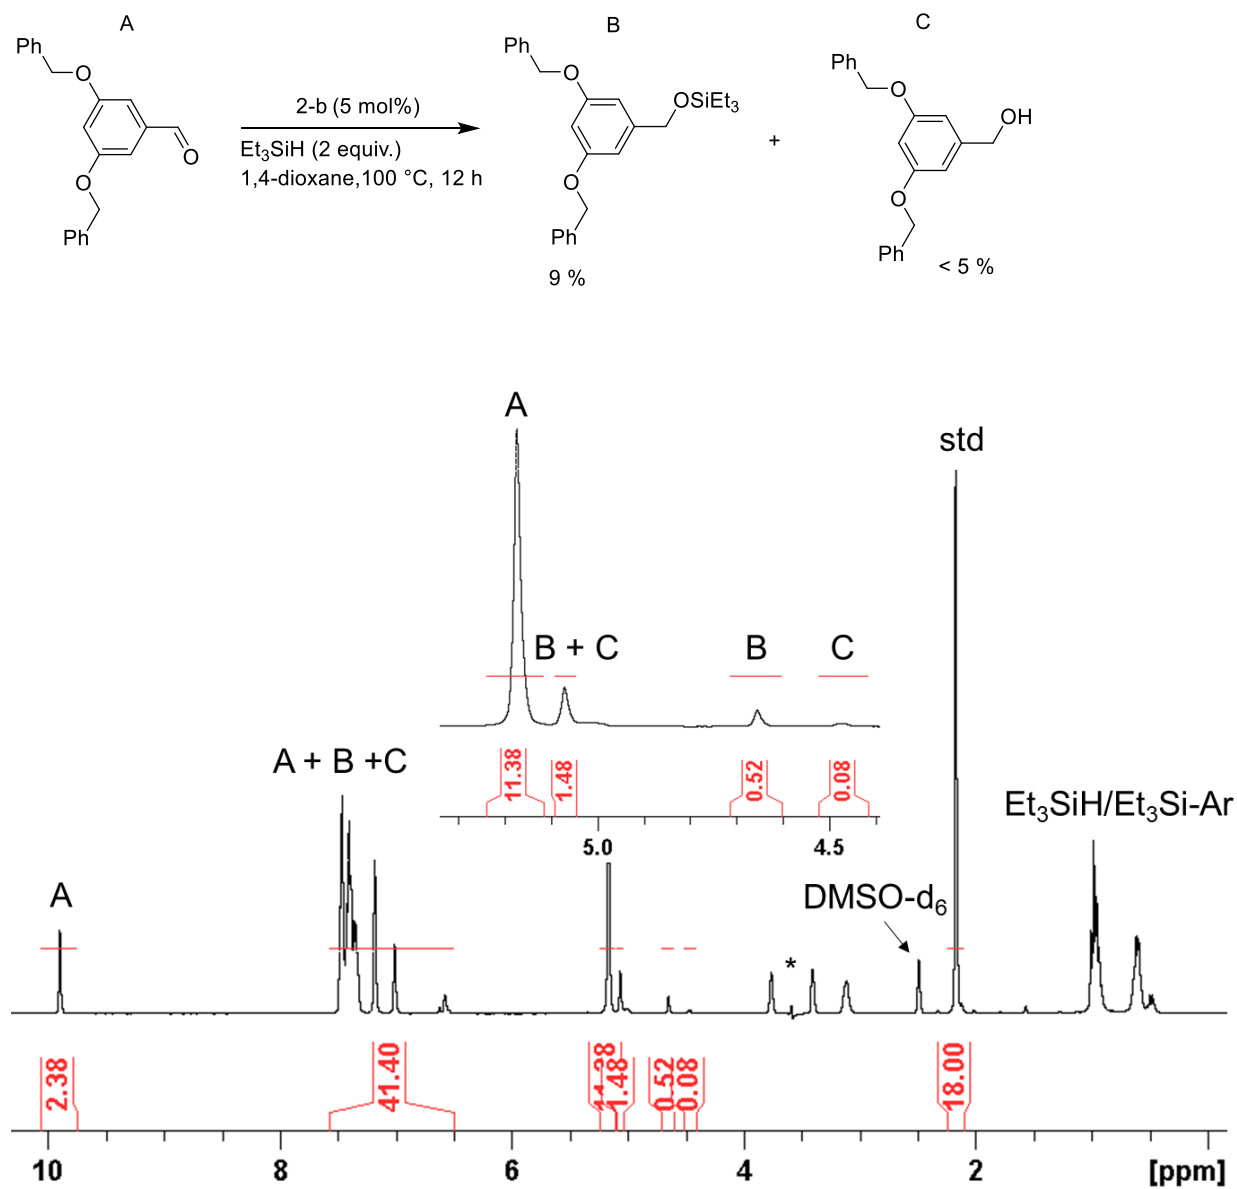

**Figure S71.**  $^1\text{H}$  NMR spectrum for the hydrosilylation of 3,5-dibenzoyloxybenzaldehyde with 2-b. (Substrate: hexamethylbenzene = 2.9:1)

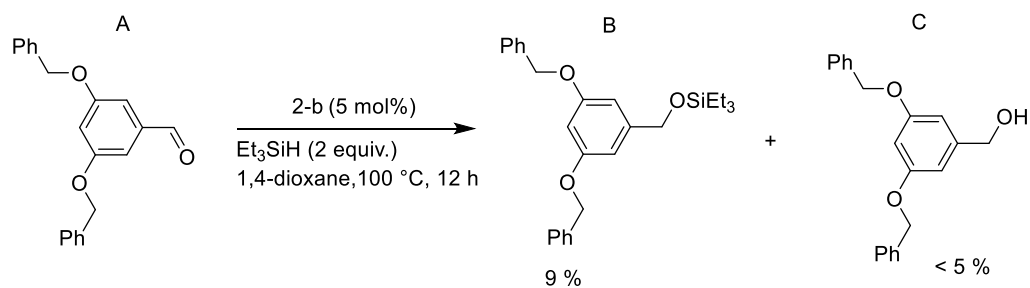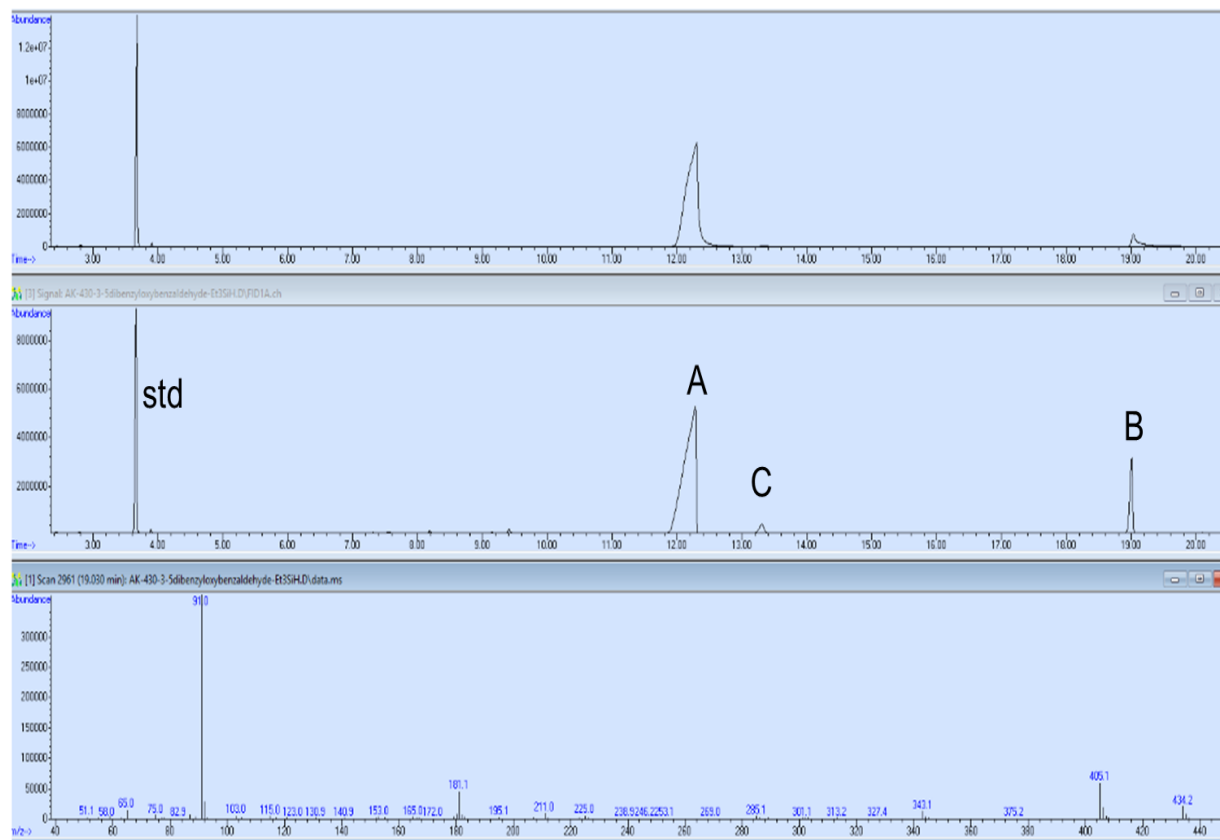

**Figure S72.** GC/MS chromatogram for the hydrosilylation of 3,5-dibenzoyloxybenzaldehyde with 2-b.

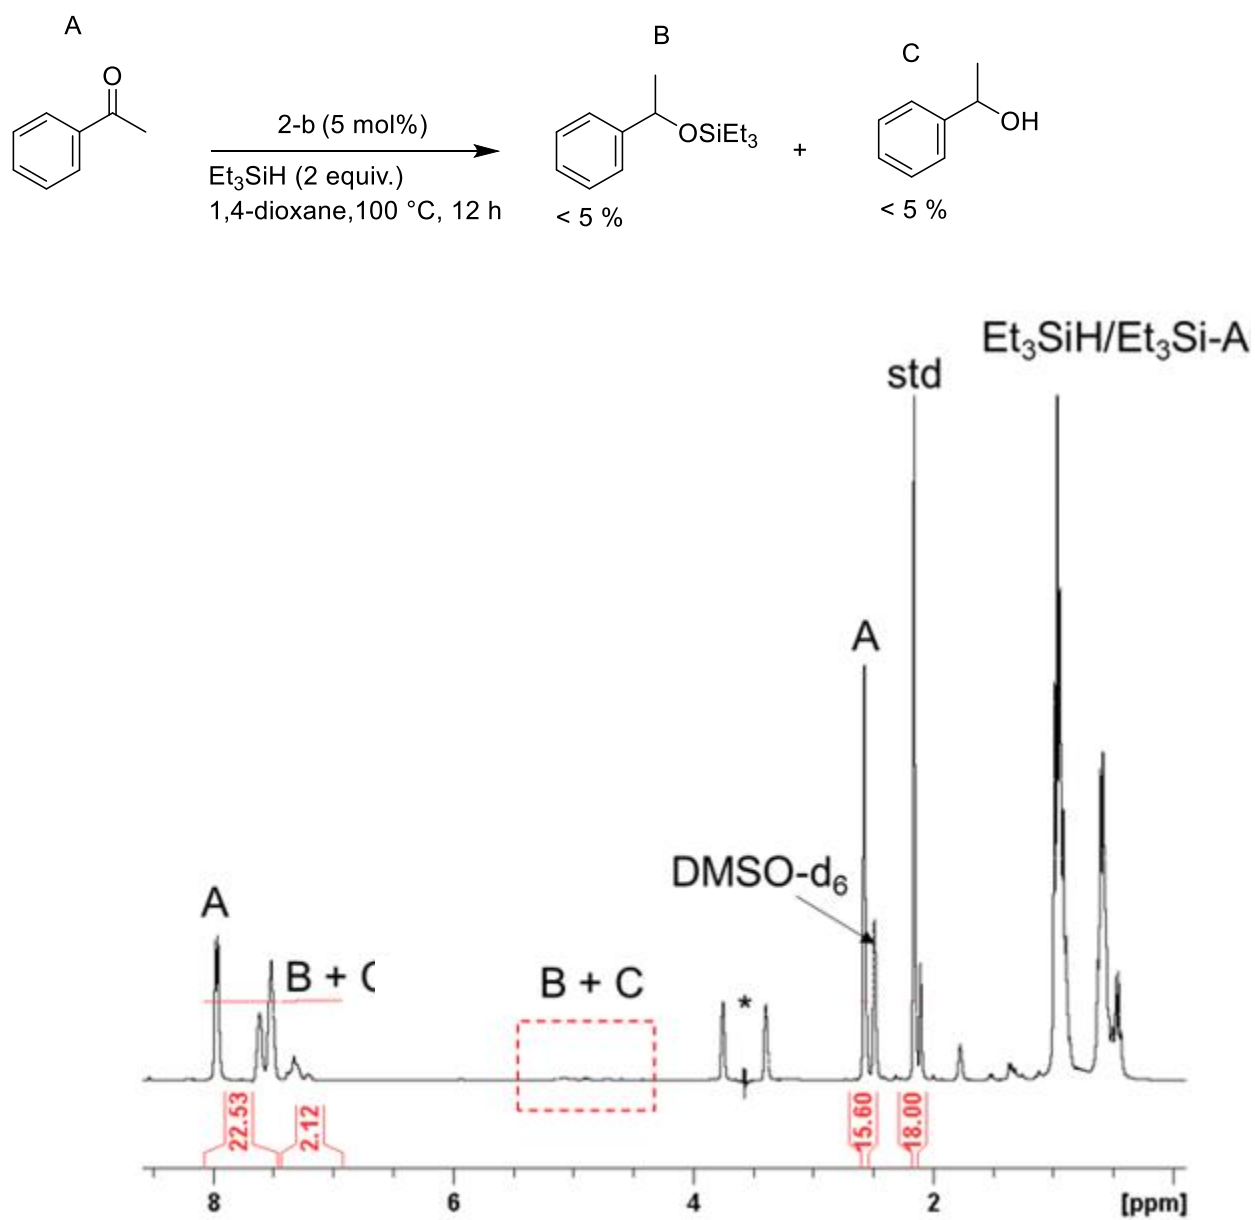

**Figure S73.**  $^1\text{H}$  NMR spectrum for the hydrosilylation of acetophenone with **2-b**. (Substrate: hexamethylbenzene = 4.6:1)

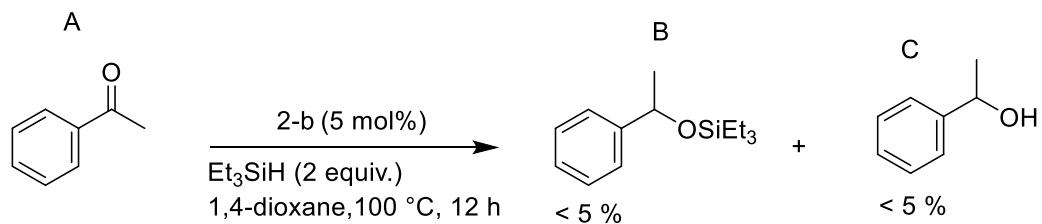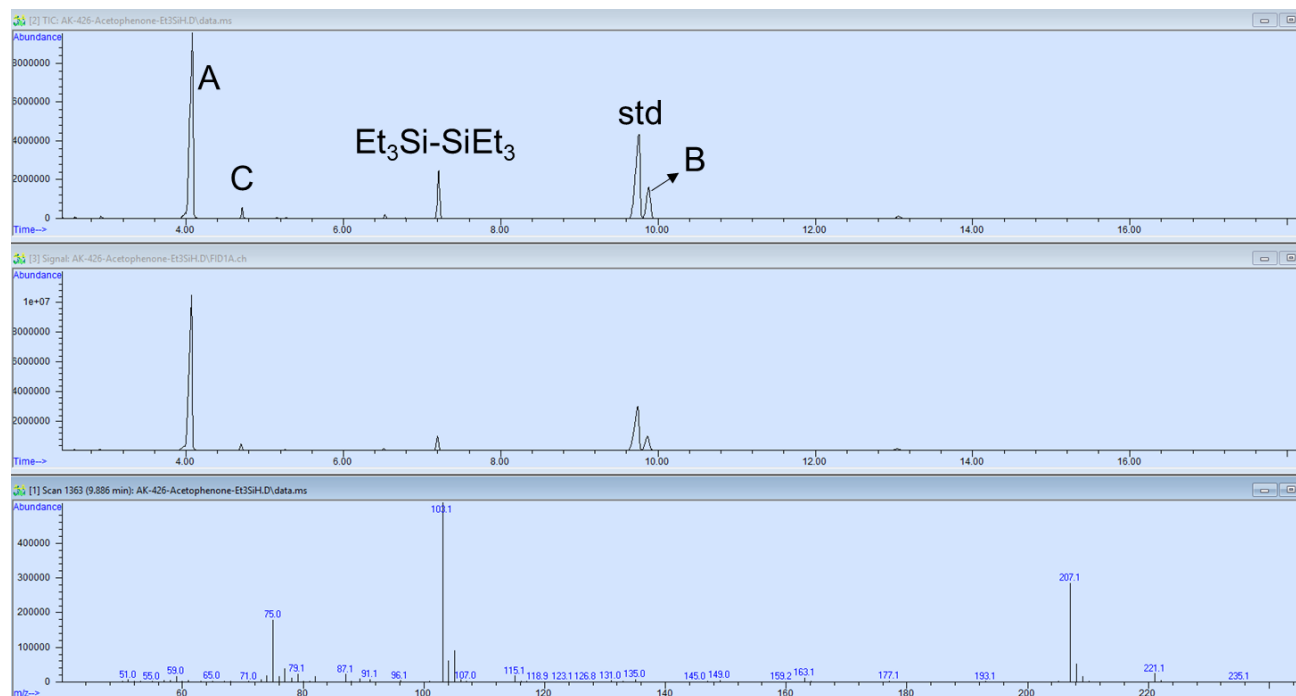

**Figure S74.** GC/MS chromatogram for the hydrosilylation of acetophenone with **2-b**.



## REFERENCES

- (1) Kassie, A. A.; Duan, P.; McClure, E. T.; Schmidt-Rohr, K.; Woodward, P. M.; Wade, C. R. Postsynthetic Metal Exchange in a Metal–Organic Framework Assembled from Co(III) Diphosphine Pincer Complexes. *Inorg. Chem.* **2019**, 58, 3227–3236.
